# Supplementary material for: Histone lactylation promotes multidrug resistance in hepatocellular carcinoma by forming a positive feedback loop with PTEN
Source: PubMed Central journal article supplement (PMC11785747; doi:10.1038/s41419-025-07359-9), 2025-01-31

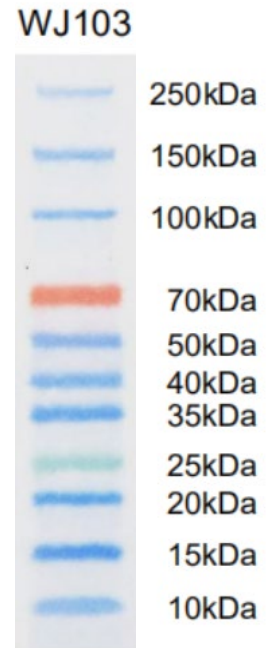

The markers were purchased from Yazyme Biotechnology Co., Ltd. (WJ101, China), and their molecular weights are indicated in the figure. For our experiments, we utilize 10% or 12.5% SDS-PAGE gels. After transferring to a PVDF membrane (ISEQ00010, Merck KGaA, Darmstadt, Germany), we cut out the respective membrane segment based on the target protein's molecular weight and the intervals as indicated by the marker. Subsequently, the corresponding primary antibody for the target protein is incubated. Finally, the development of the western blot is carried out using ProteinSimple FluorChemE, eBlot Touch Imager, and Bio-Rad ChemiDoc western blot imaging system.

Figure.1E

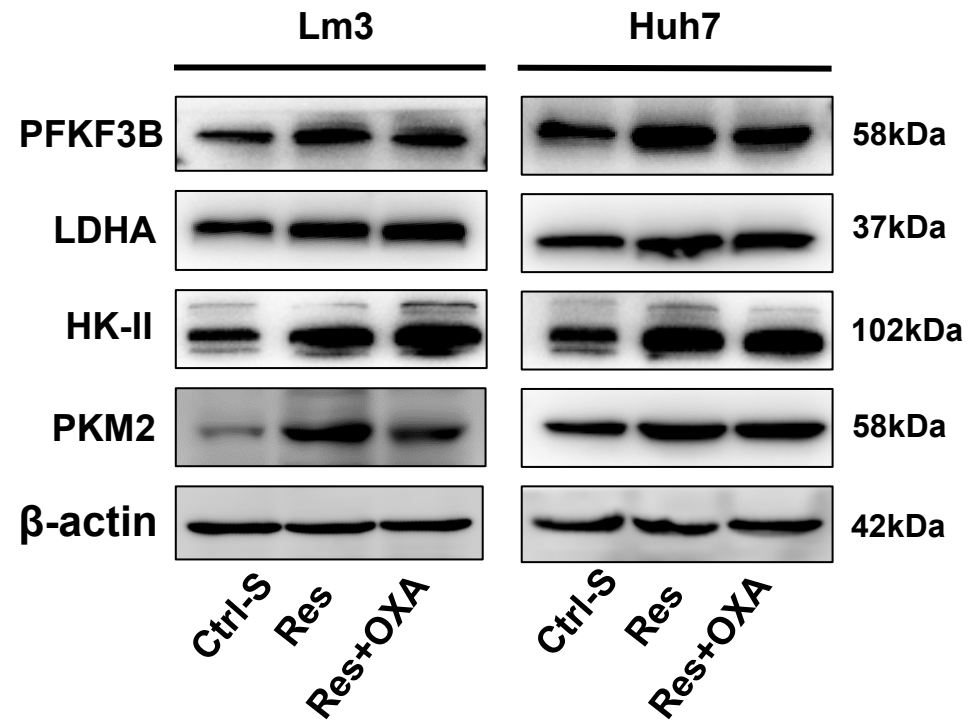

Lm3

**PFKF3B 58kDa**

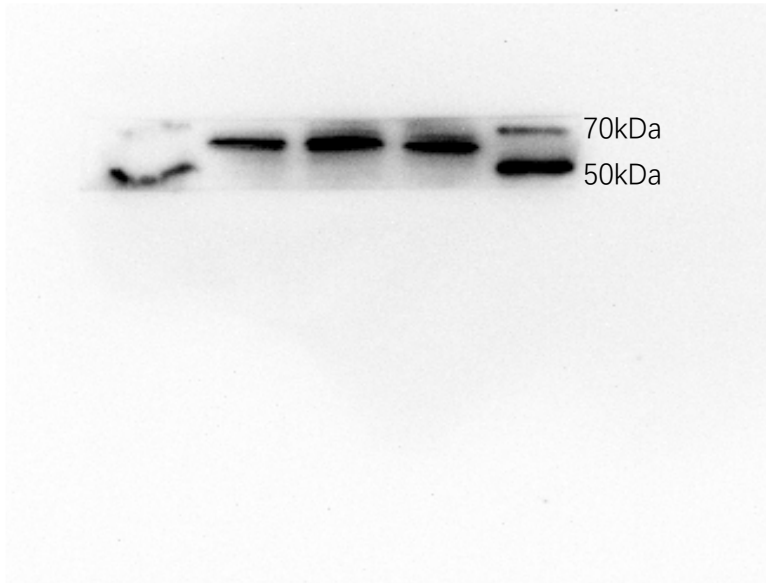

**LDHA 37kDa**

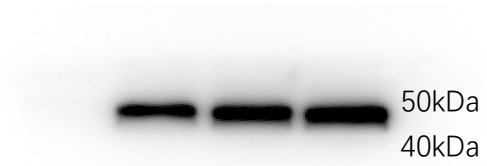

**HK-II 102kDa**

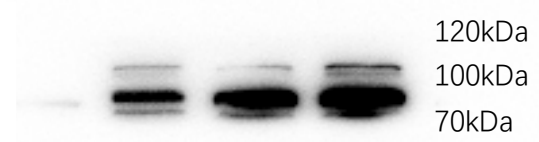

**PKM2 58kDa**

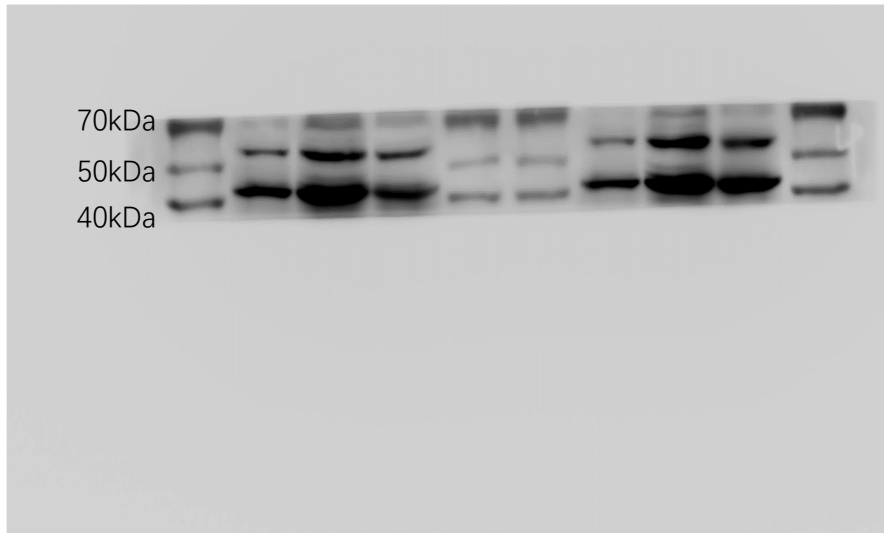

**$\beta$ -actin 42kDa**

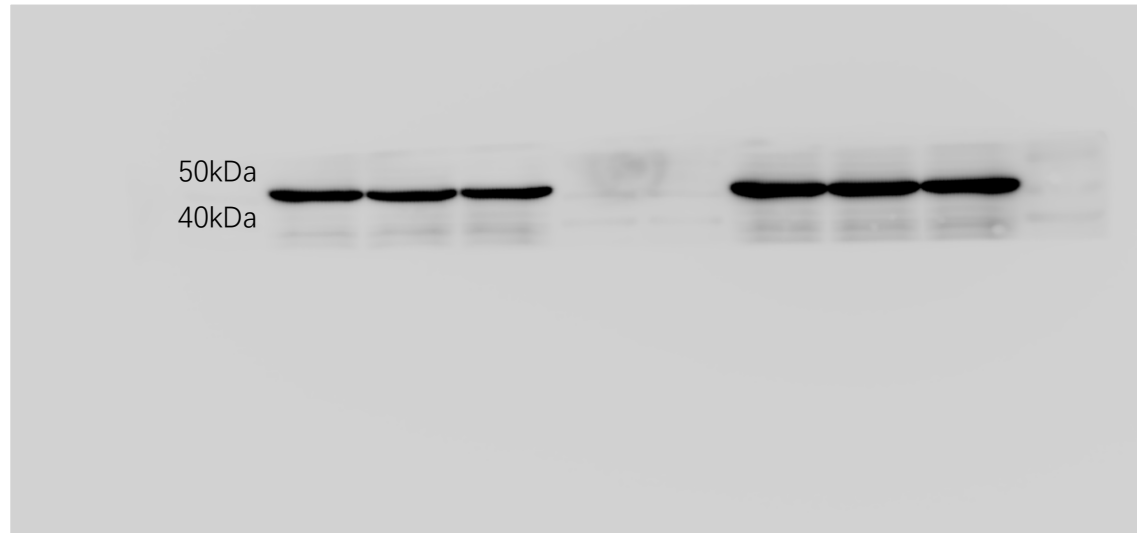

Huh7

**PFKF3B 58kDa**

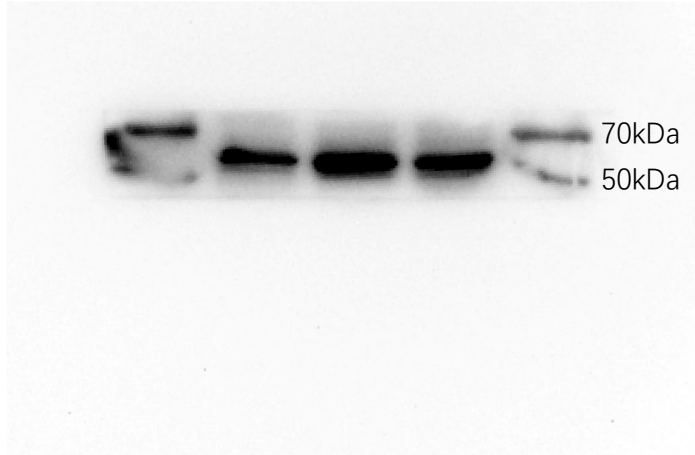

**LDHA 37kDa**

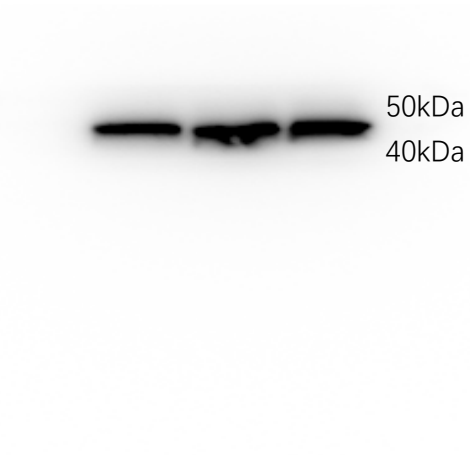

**HK-II 102kDa**

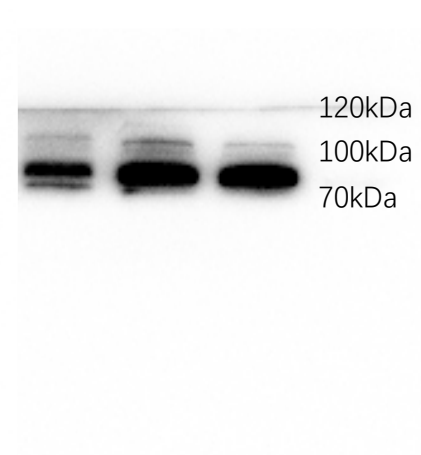

**PKM2 58kDa**

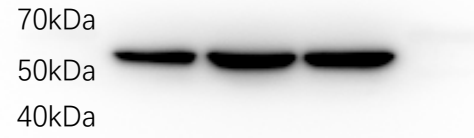

**$\beta$ -actin 42kDa**

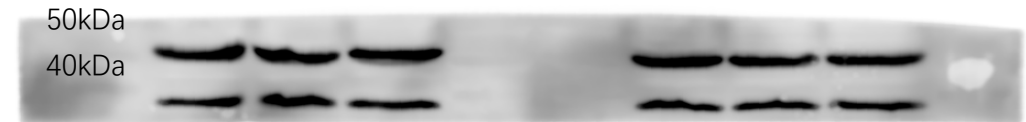



Lm3

**Pk1a 10-250kDa**

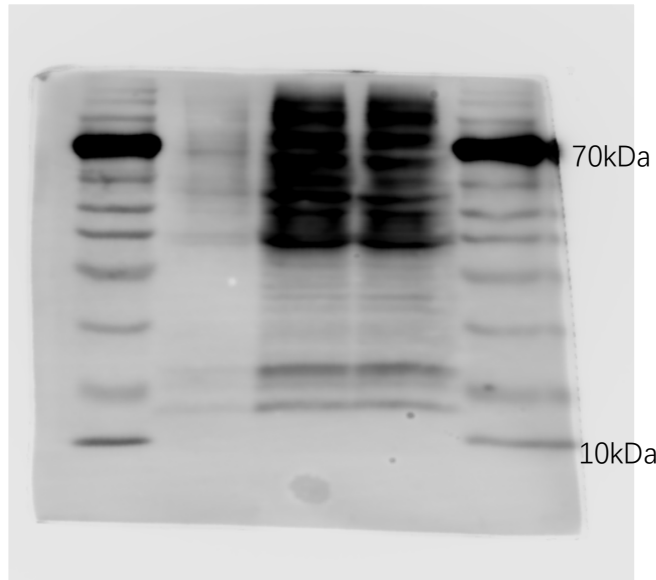

**H3K141a 18kDa**

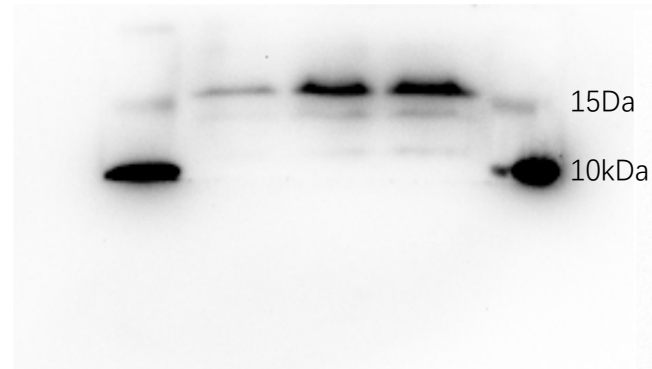

**H3K151a 18kDa**

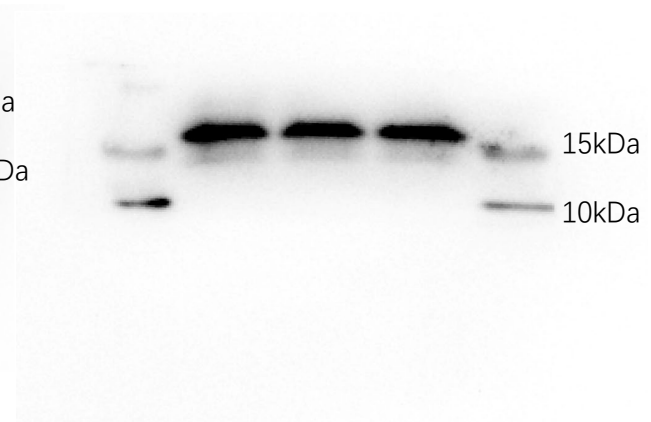

**Histone H3 18kDa**

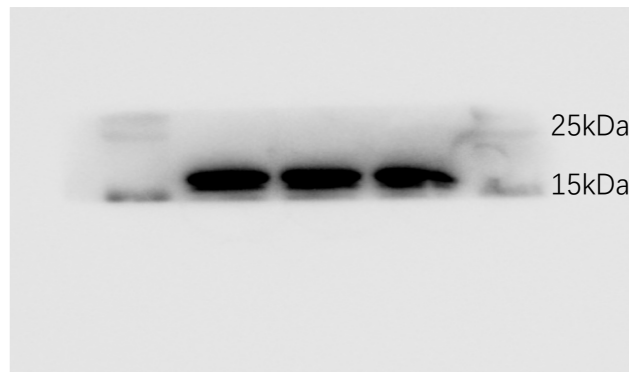

**$\beta$ -actin 42kDa**

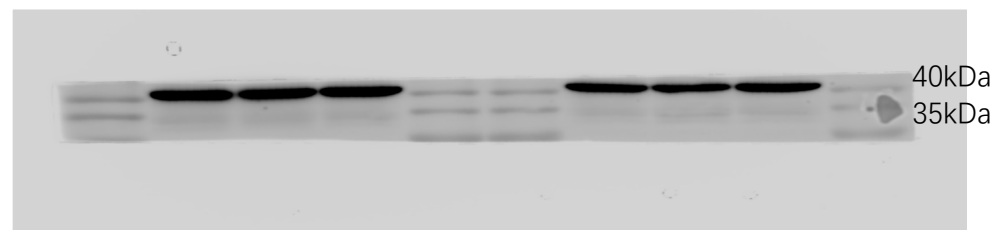

Huh7

**Pk1a 10-250kDa**

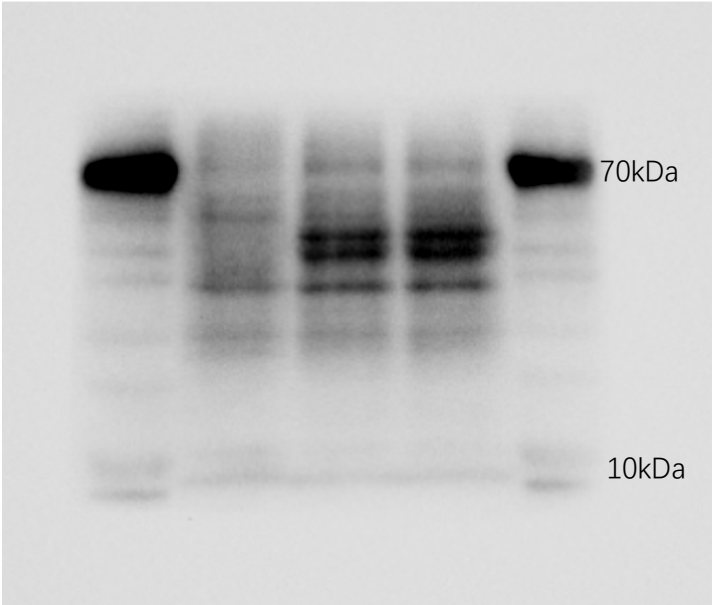

**H3K141a 18kDa**

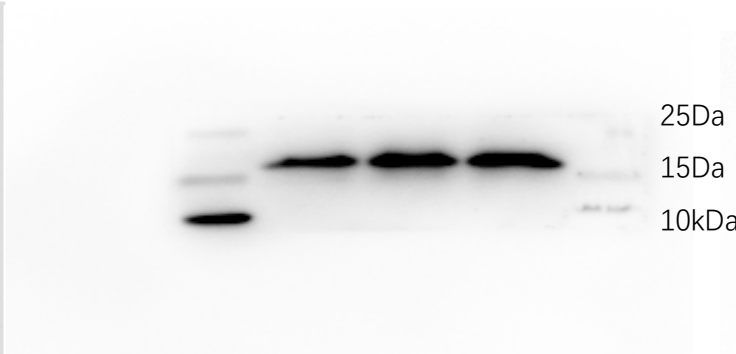

**H3K151a 18kDa**

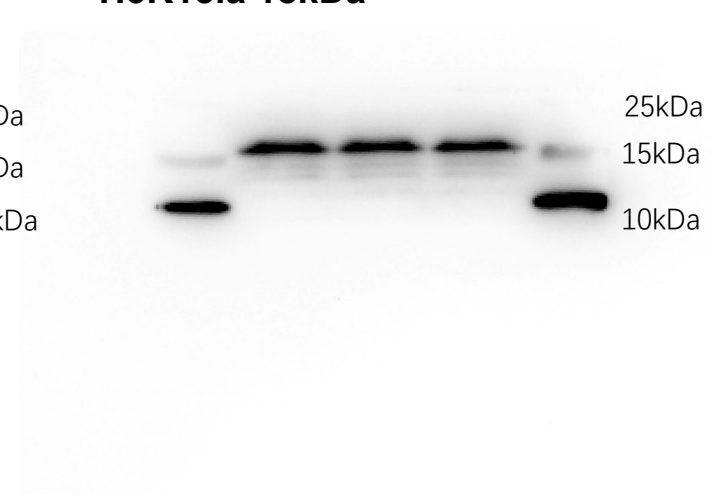

**Histone H3 18kDa**

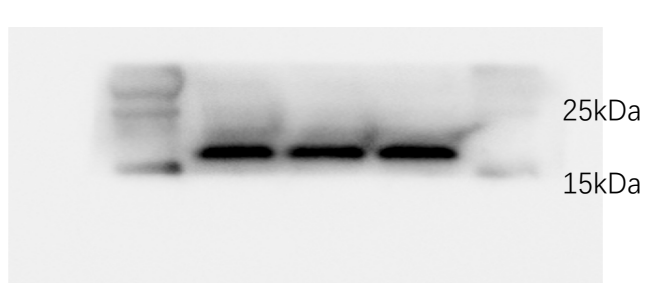

**$\beta$ -actin 42kDa**

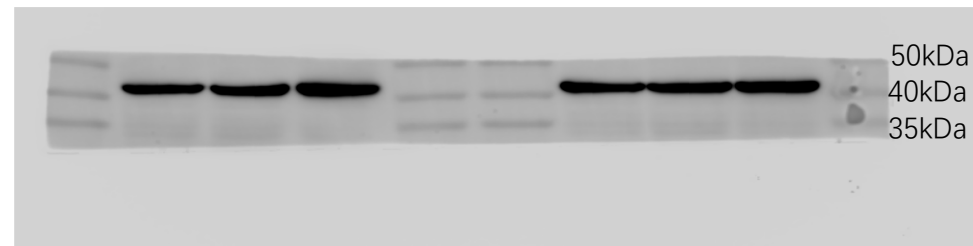

# Figure.2B

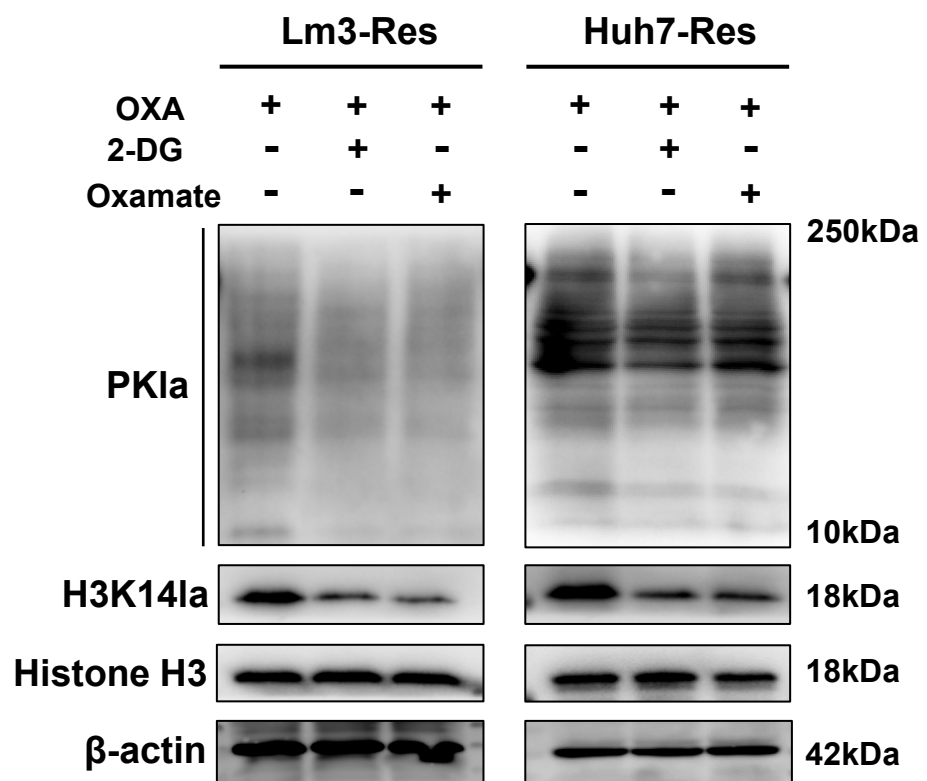



**Lm3-Res**

**Pk1a 10-250kDa**

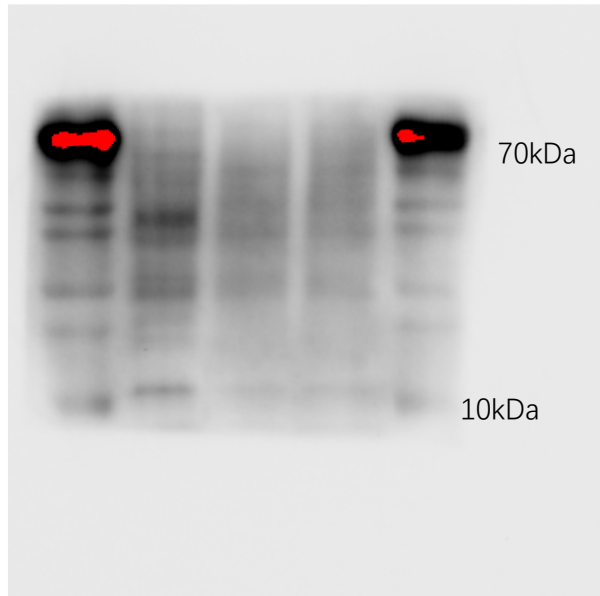

**H3K141a 18kDa**

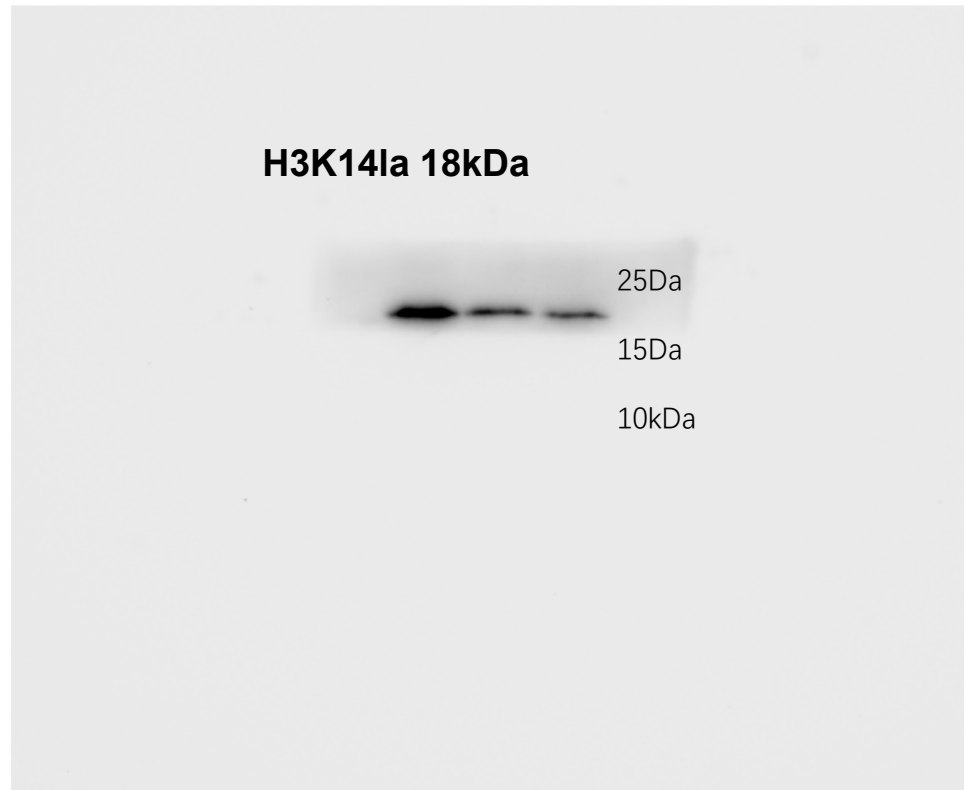

**Histone H3 18kDa**

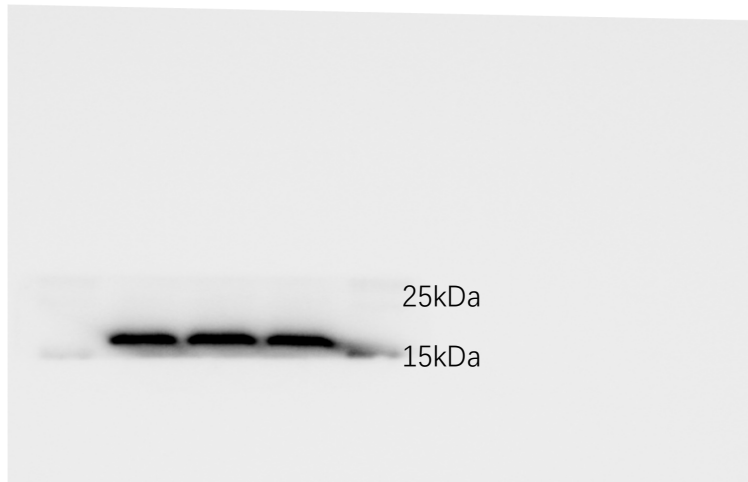

**$\beta$ -actin 42kDa**

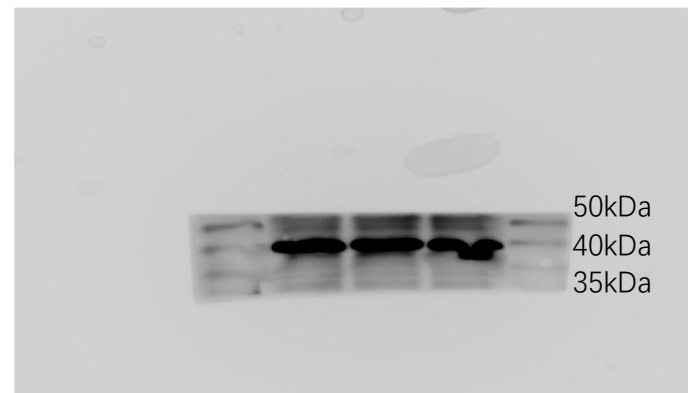

Huh7-Res

**Pk1a 10-250kDa**

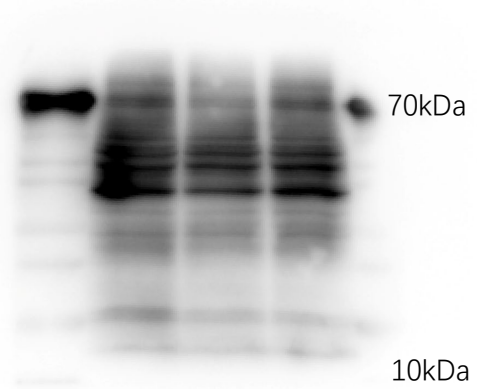

**H3K141a 18kDa**

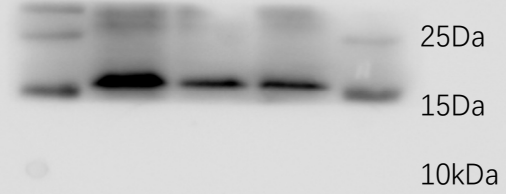

**Histone H3 18kDa**

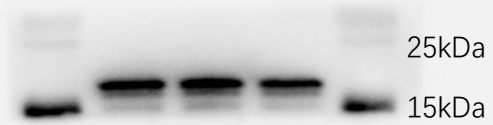

**$\beta$ -actin 42kDa**

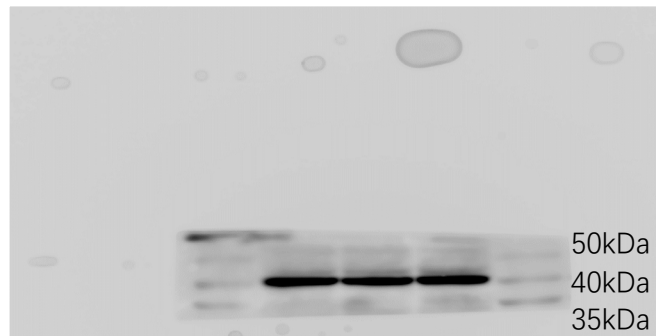

Figure.2F

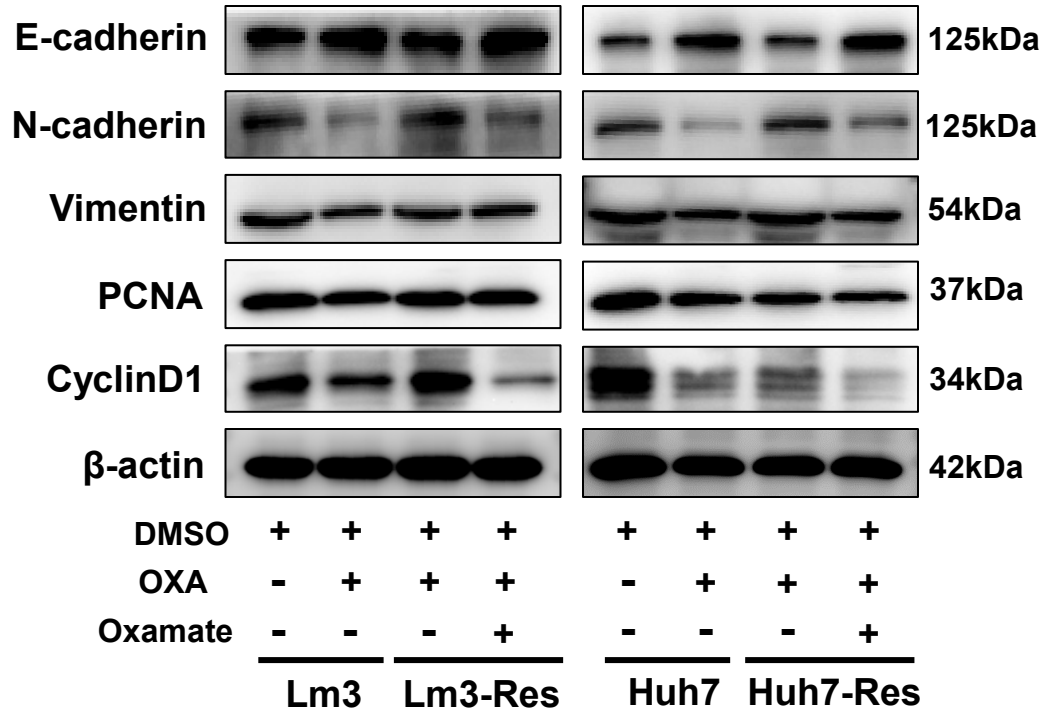

Lm3  $\beta$ -actin

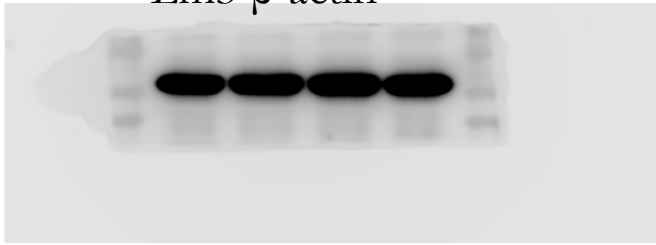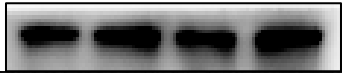

lm3 E-cadherin

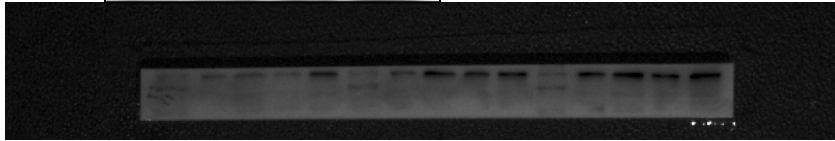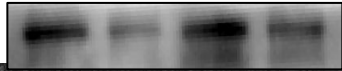

lm3 N-cadherin

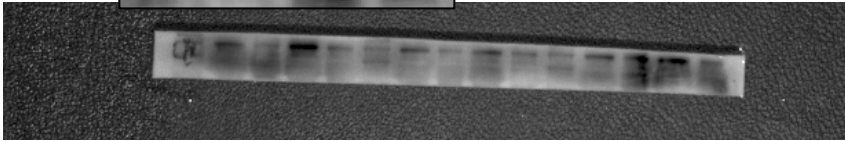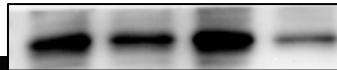

Lm3 CyclinD1 37kDa

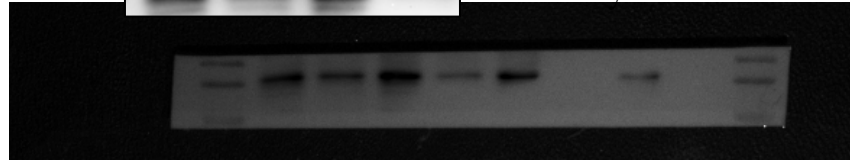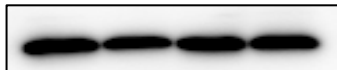

PCNA 37kDa

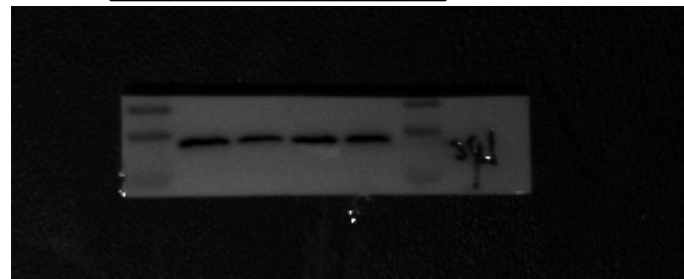

Huh7 Vimentin

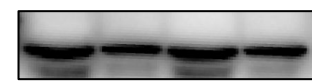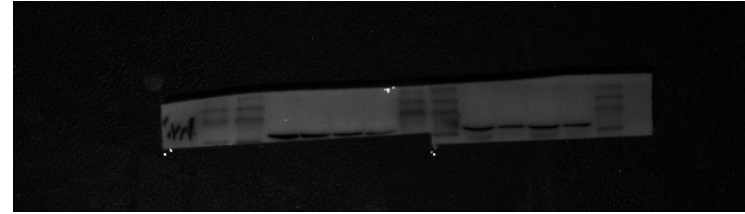

Huh7 N-cadherin

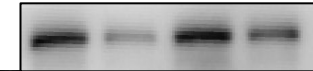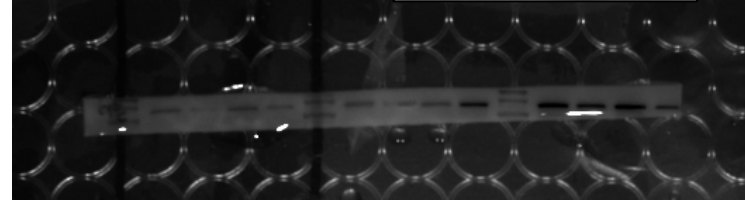

Huh7 E-cadherin

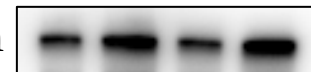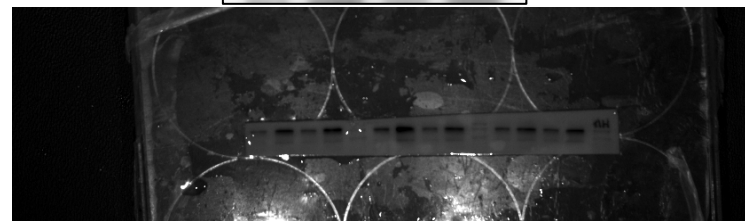

Huh7 CyclinD1 37kDa

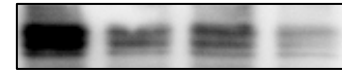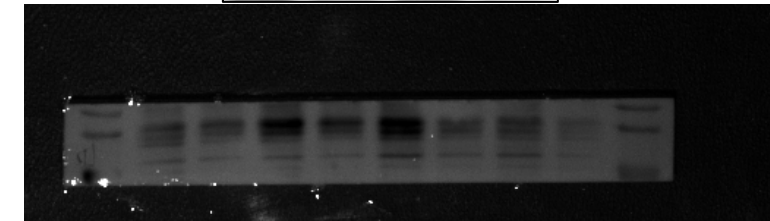

Huh7  $\beta$ -actin

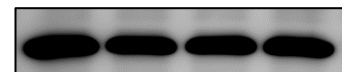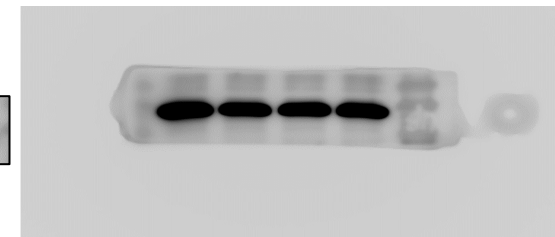

Figure.3G

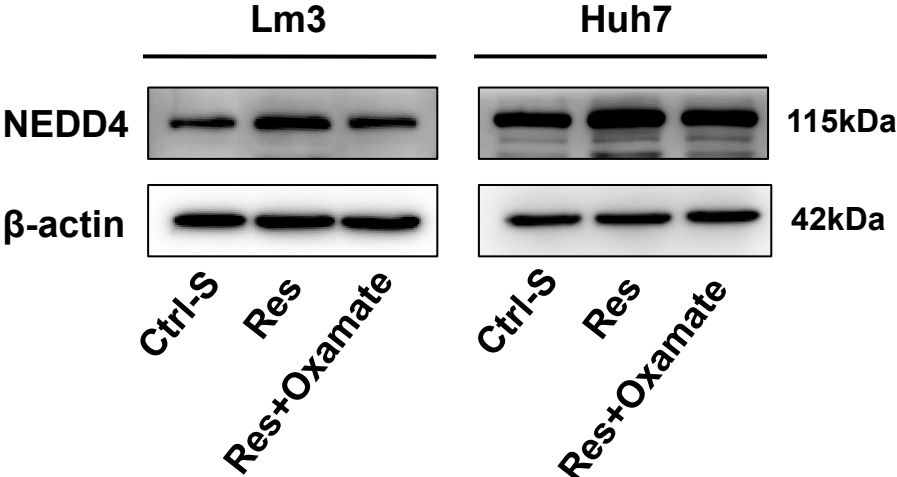

Huh7 NEDD4 115kDa

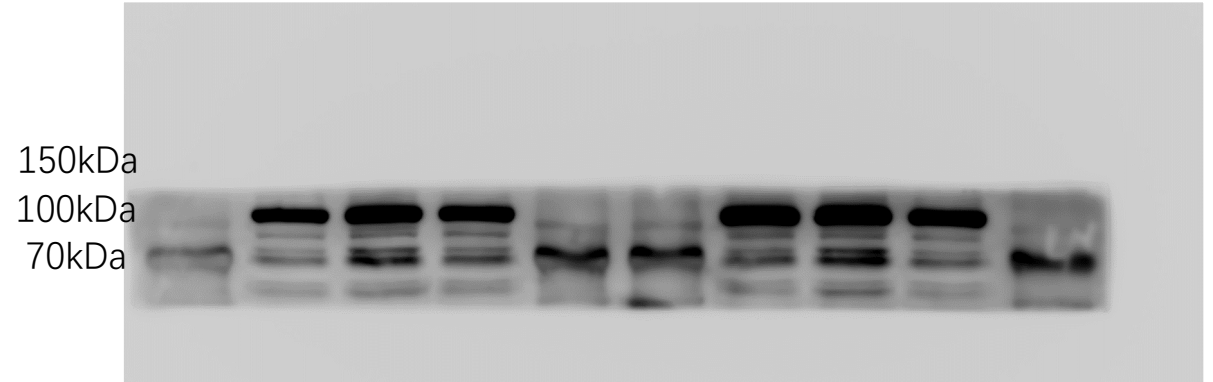

Lm3 NEDD4 115kDa

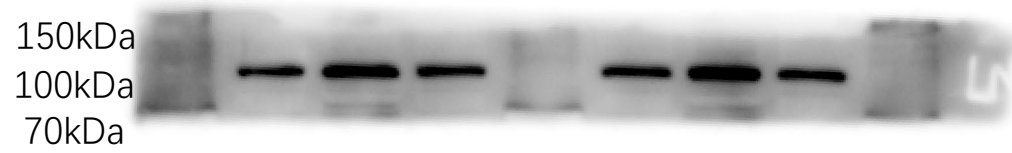

Huh7  $\beta$ -actin 42kDa

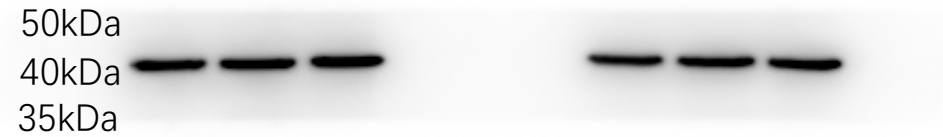

Lm3  $\beta$ -actin 42kDa

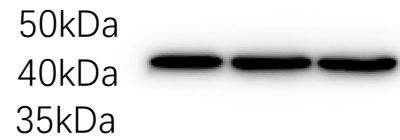

Figure.3H

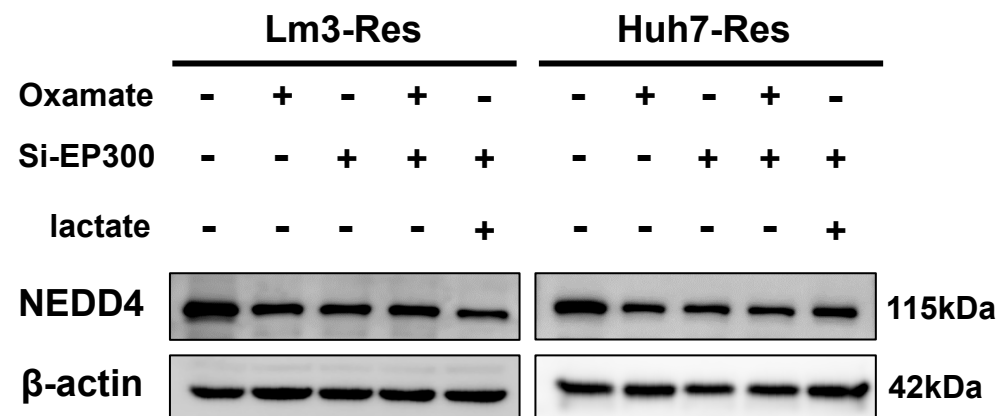

Lm3 NEDD4 115kDa

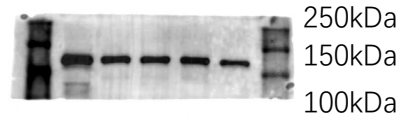

Huh7 NEDD4 115kDa

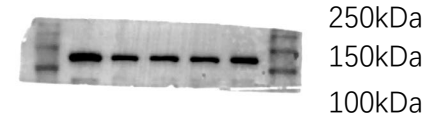

Lm3  $\beta$ -actin 42kDa

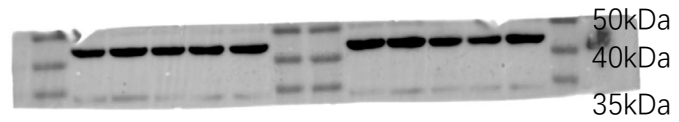

Huh7  $\beta$ -actin 42kDa

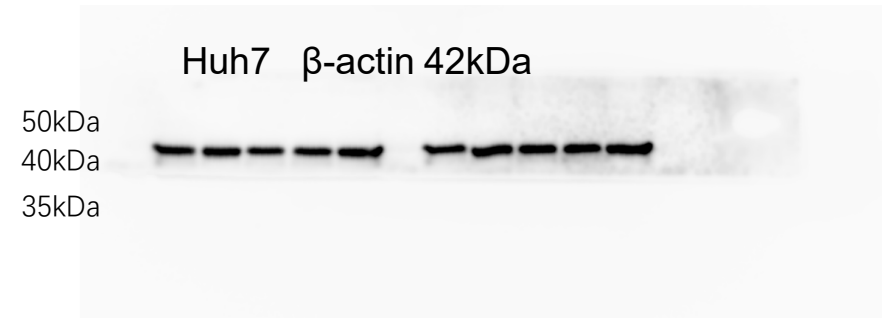



Figure.4E

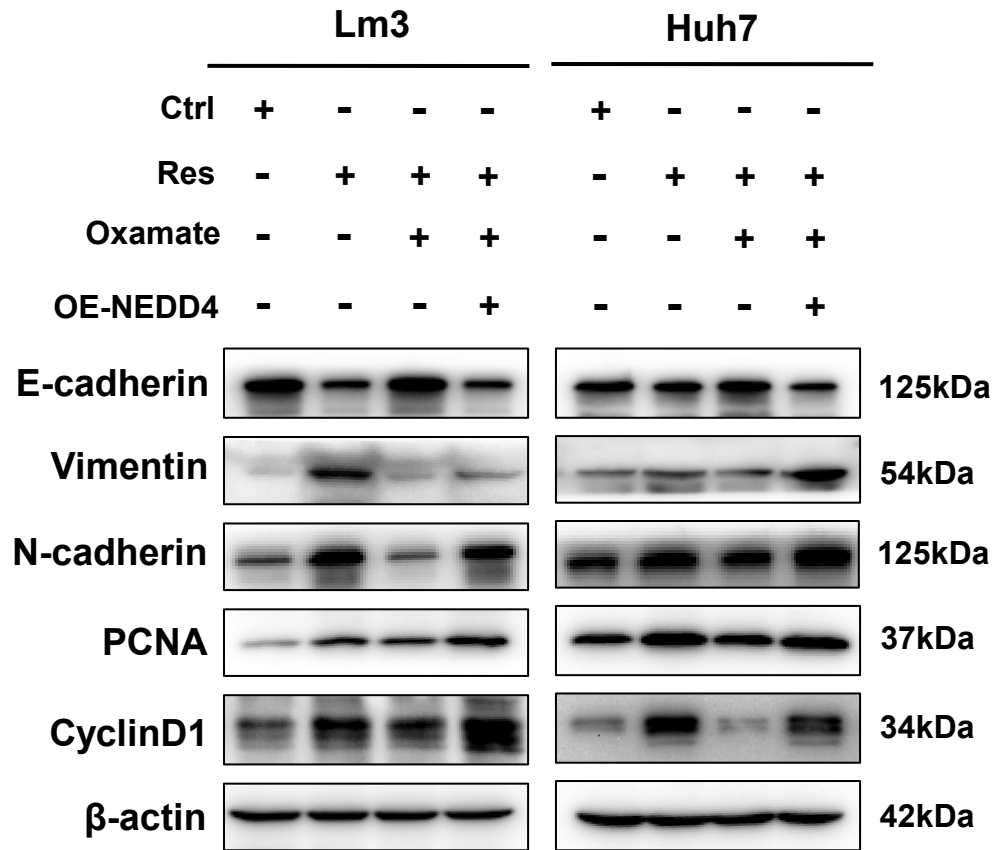

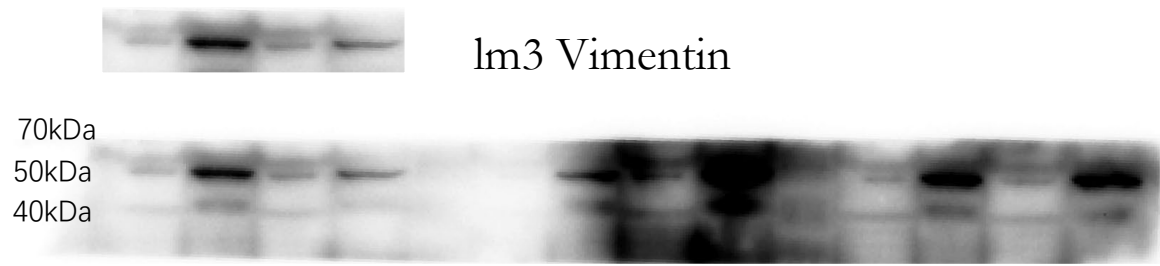

Im3 PCNA

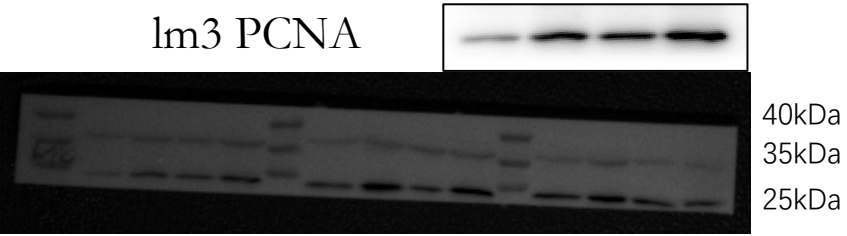

Im3 cyclinD1

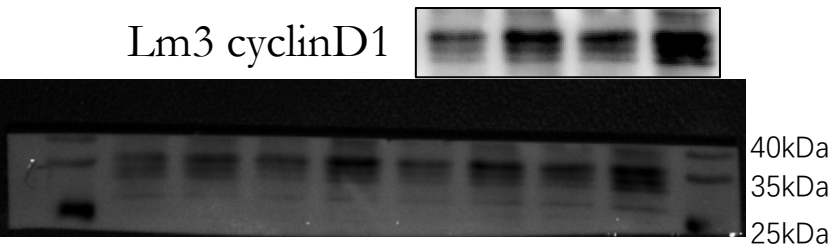

Im3 ACTB

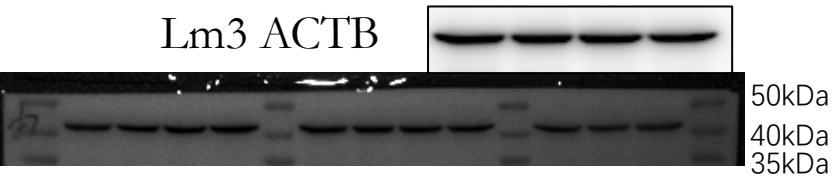

Im3 E-cadherin

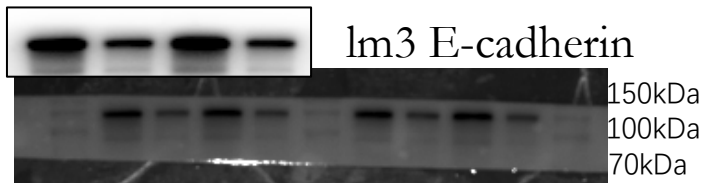

Huh7 cyclinD1

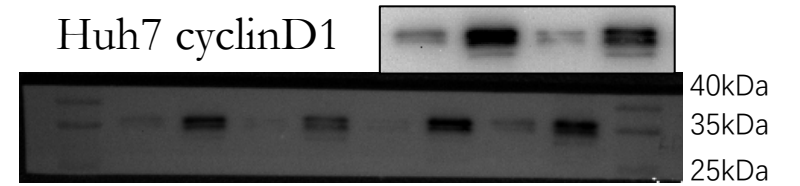

Huh7 N-cadherin

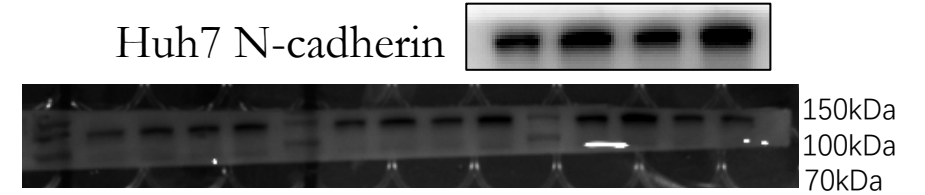

Huh7 PCNA

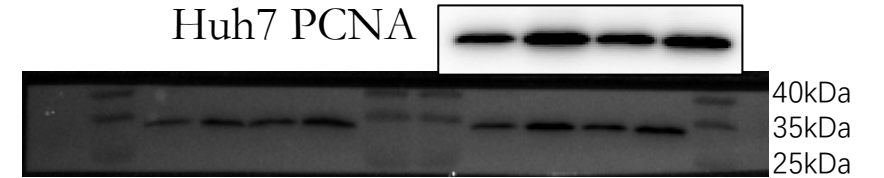

Huh7 Vimentin

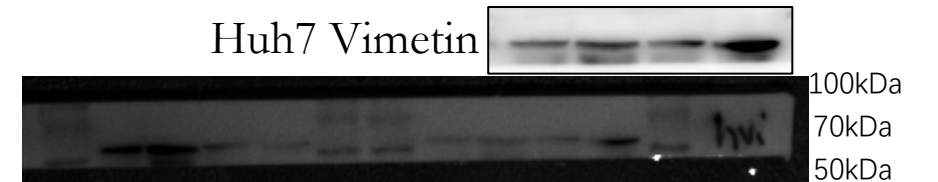

huh7 ACTB

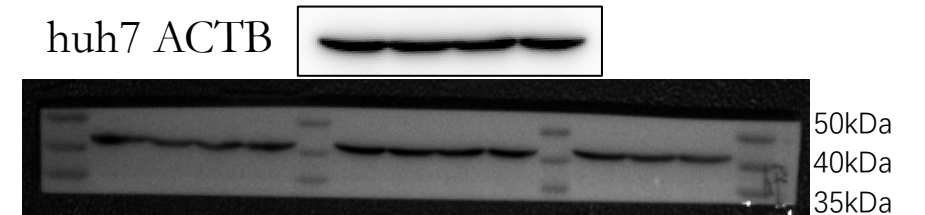

Huh7 E-cadherin

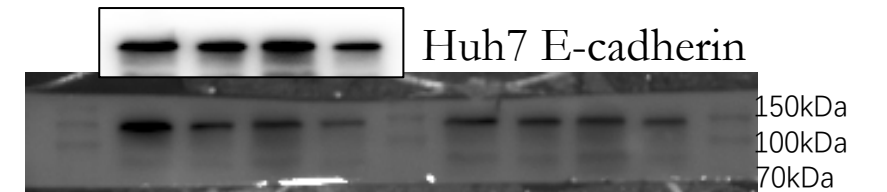

Figure.5B

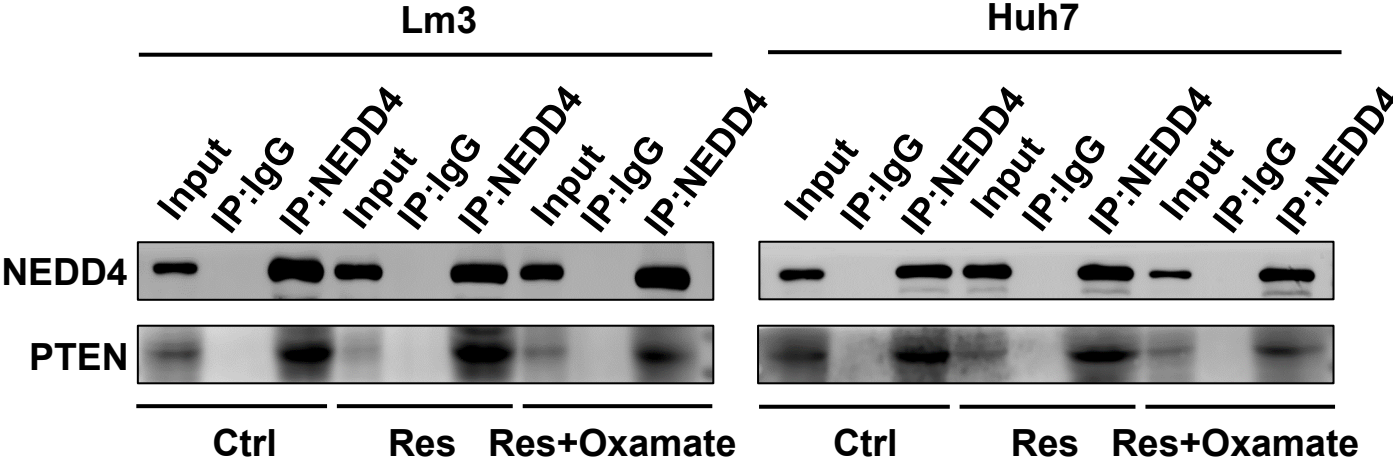

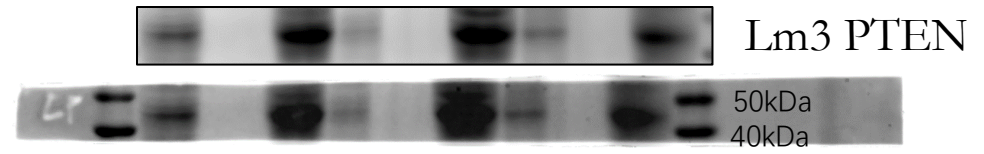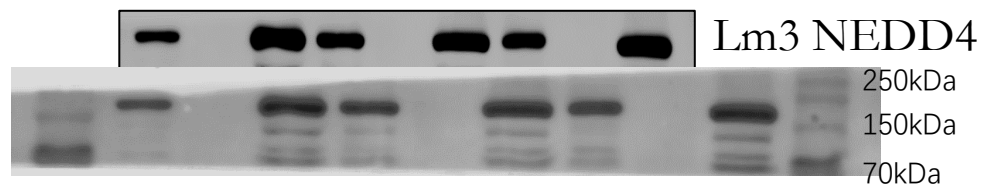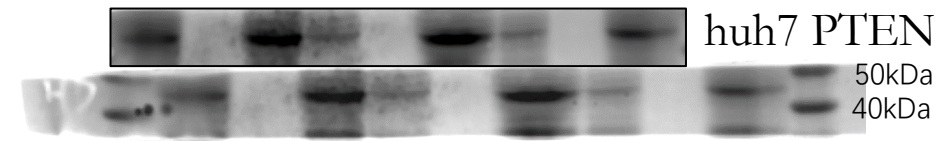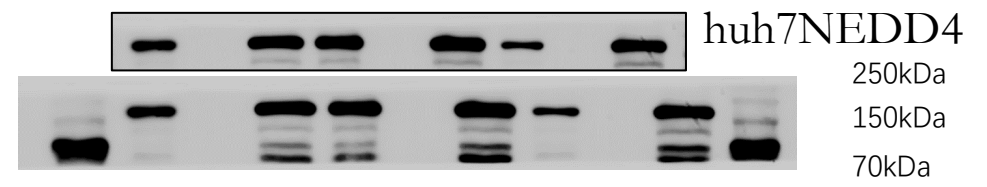



Lm3 PTEN

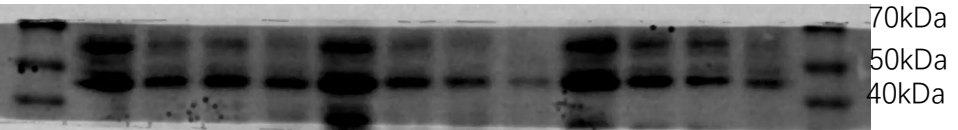

huh7 PTEN

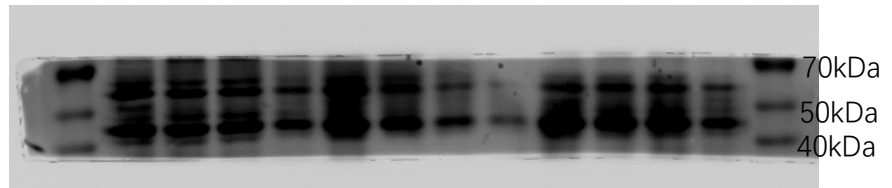

Lm3 ACTB

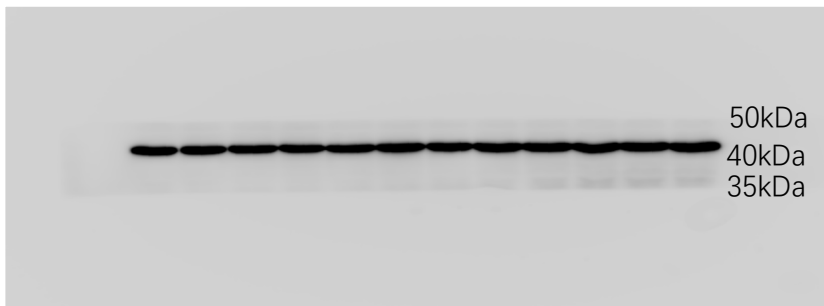

Huh7 ACTB

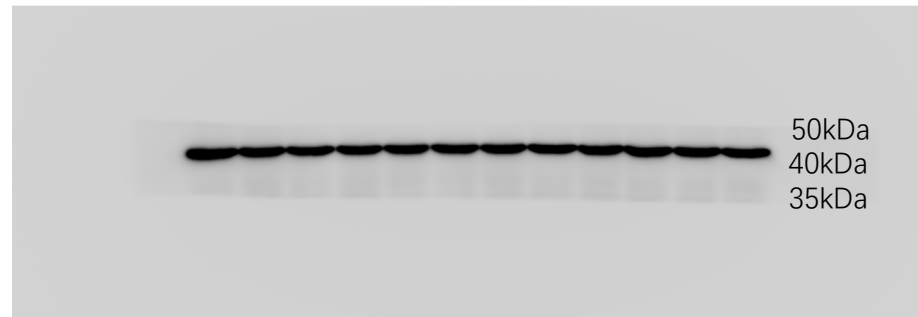



Lm3 PTEN

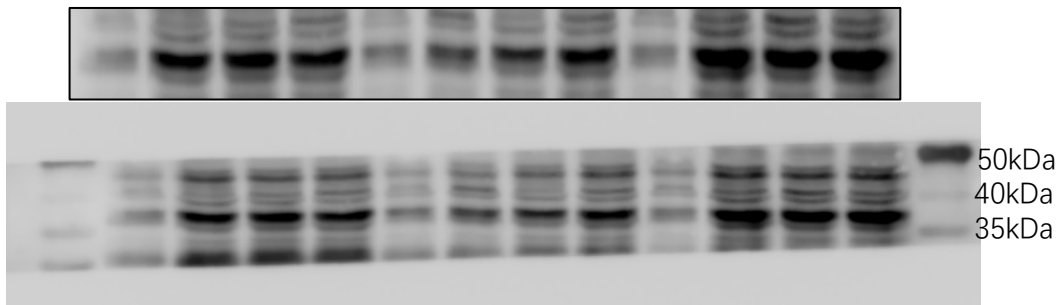

huh7 PTEN

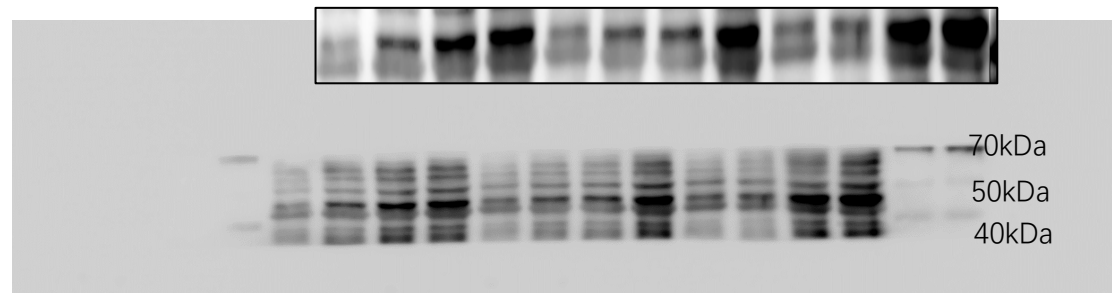

Lm3 actb

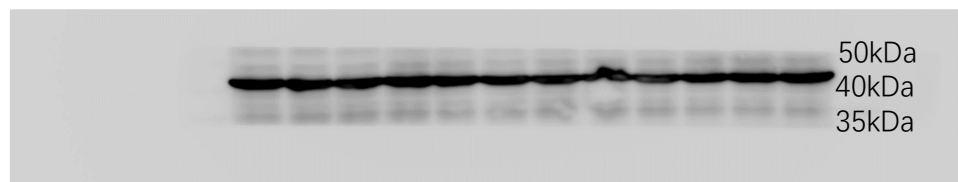

Huh7 actb

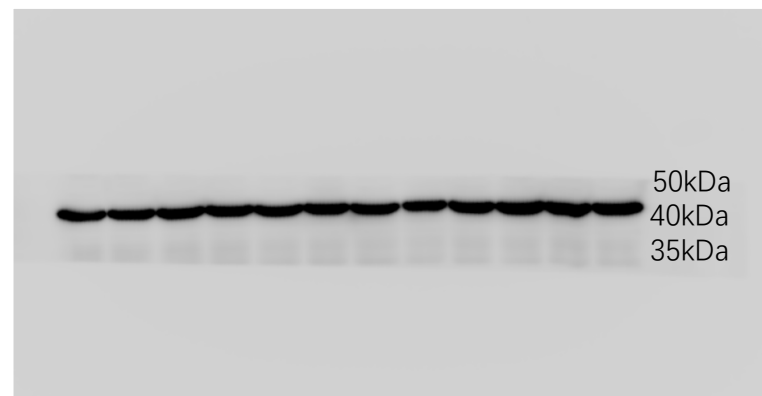



Figure.5H

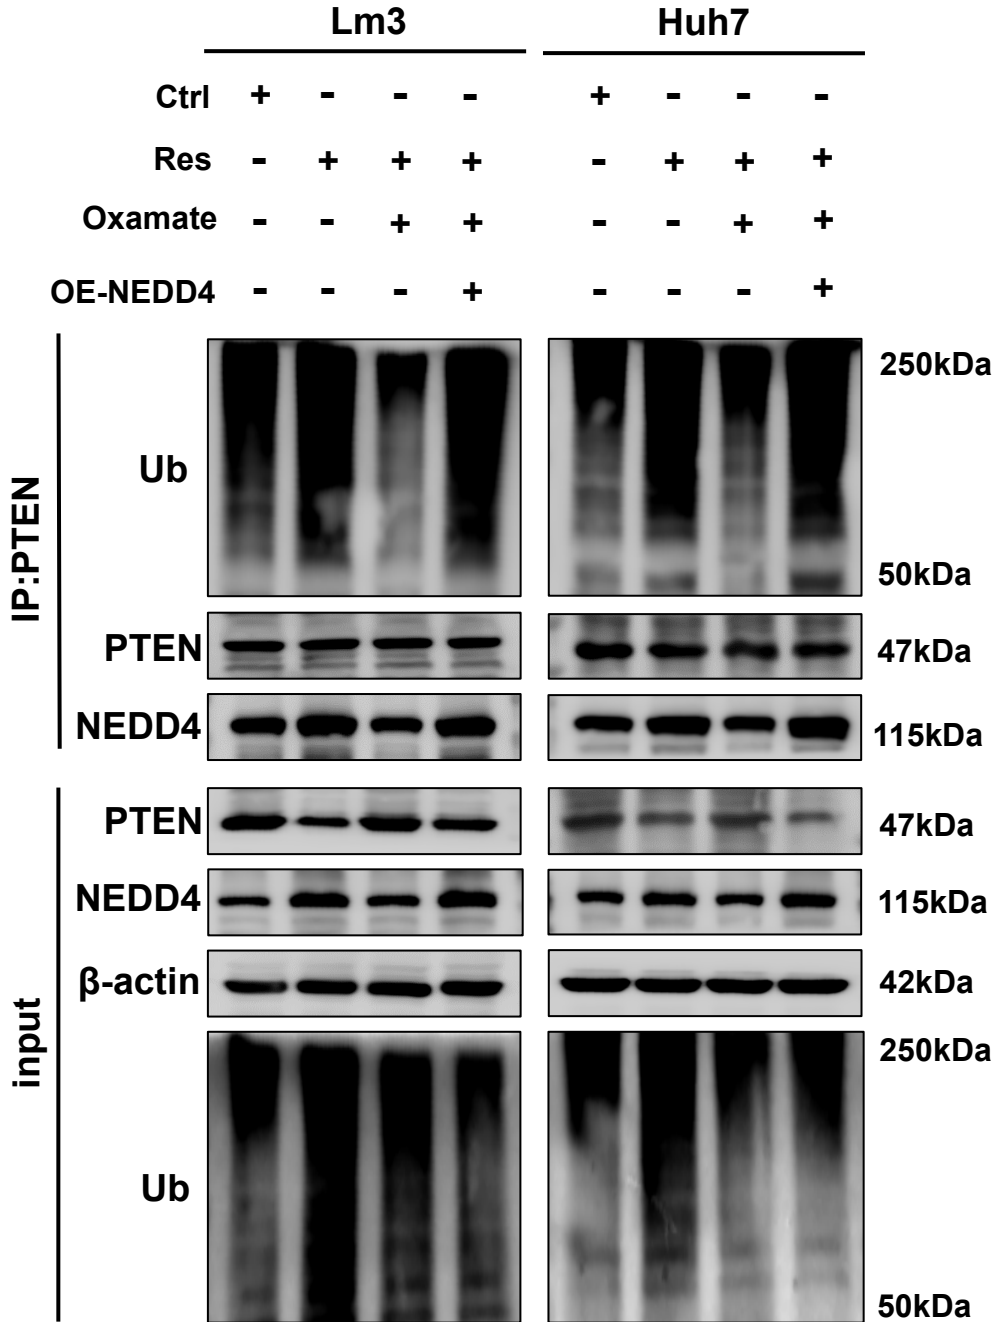

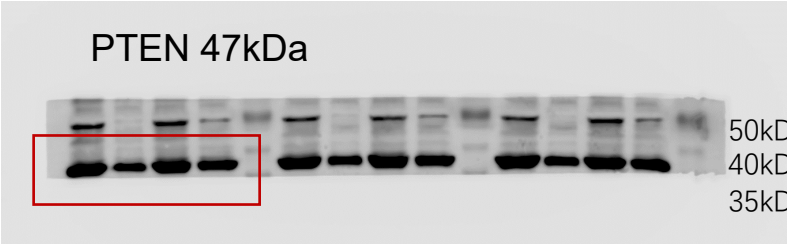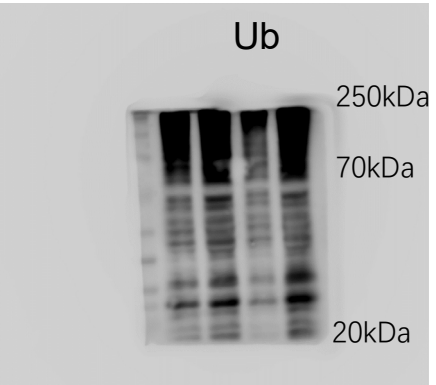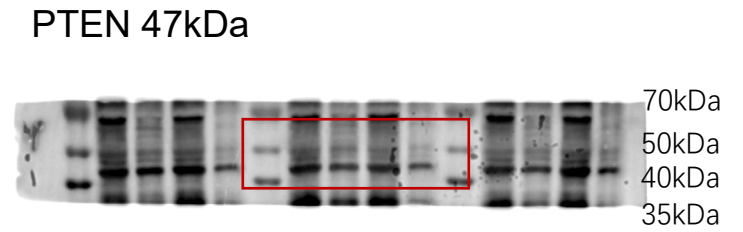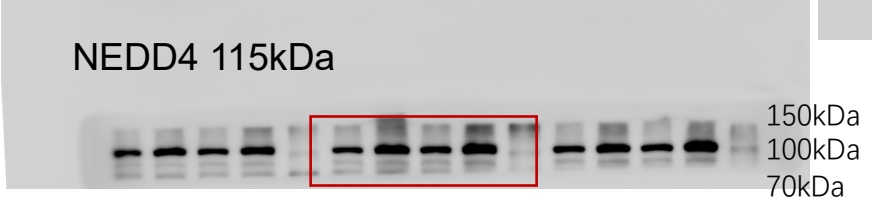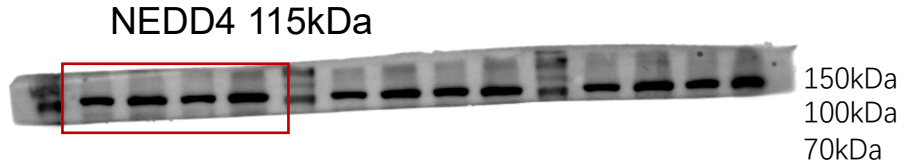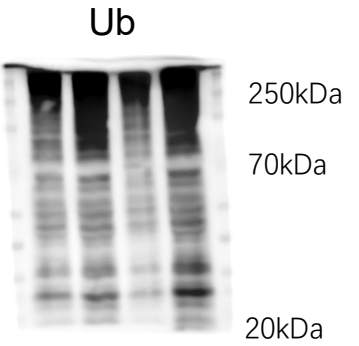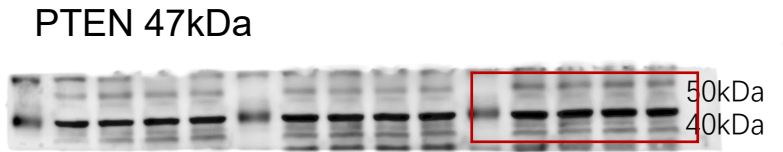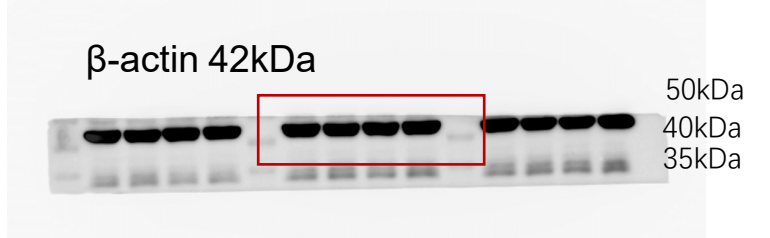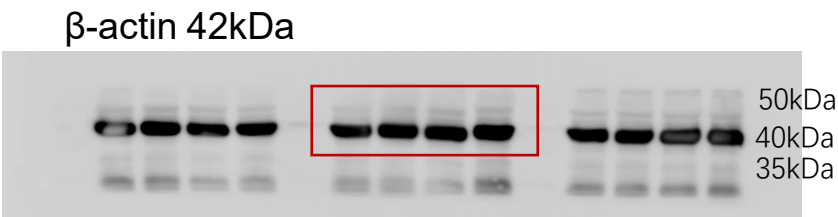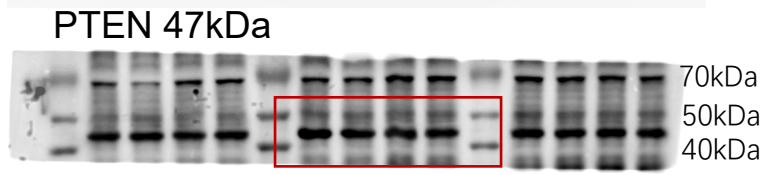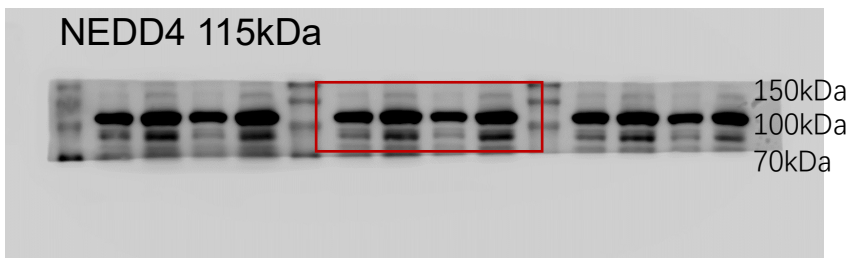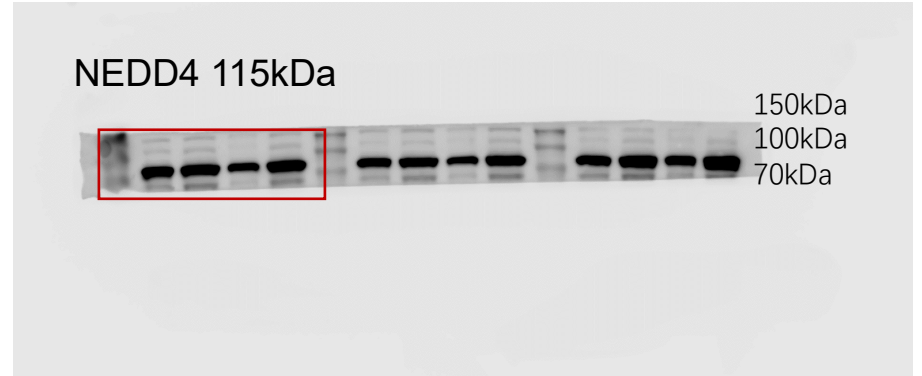

Ub

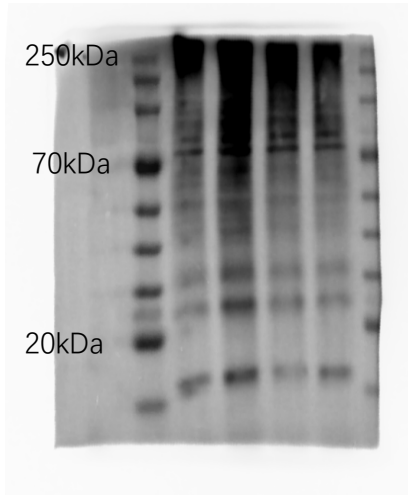

Ub

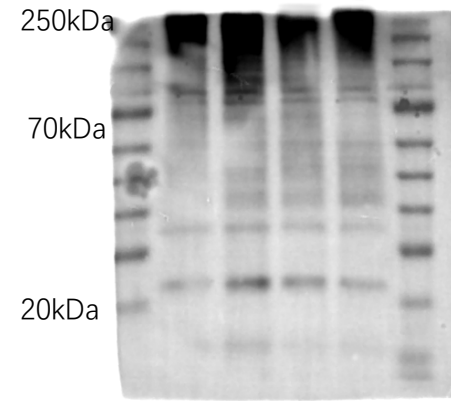



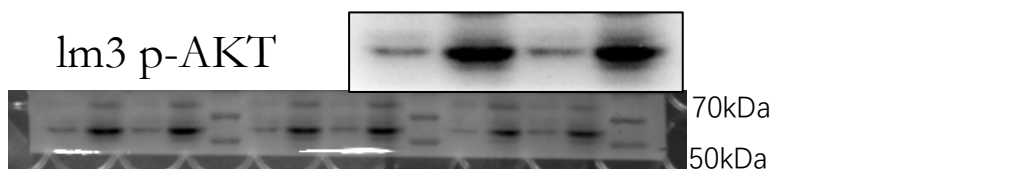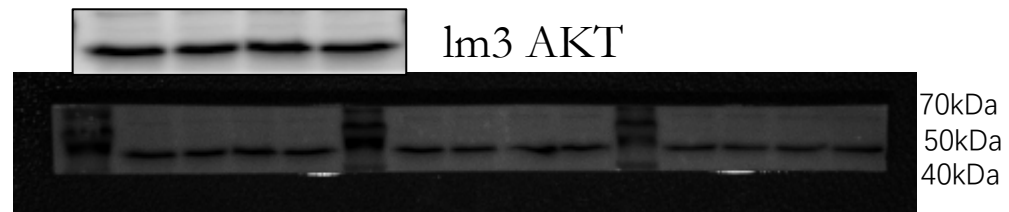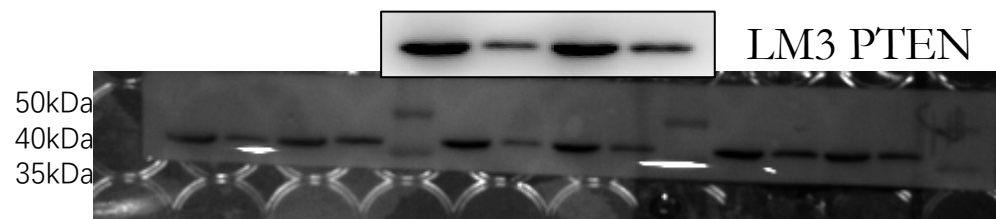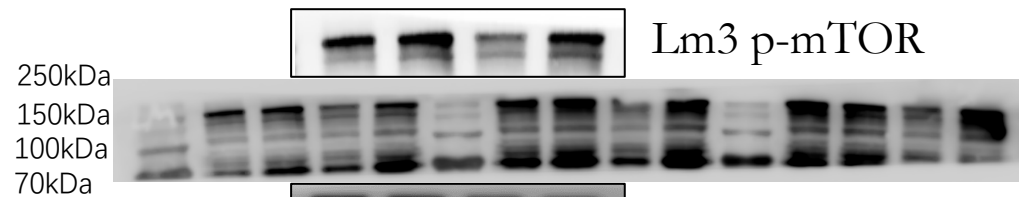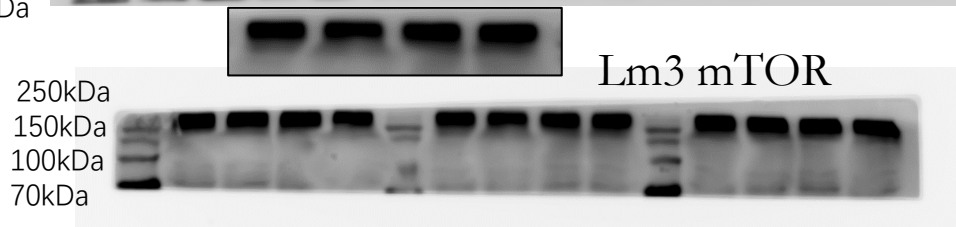

Lm3  $\beta$ -actin

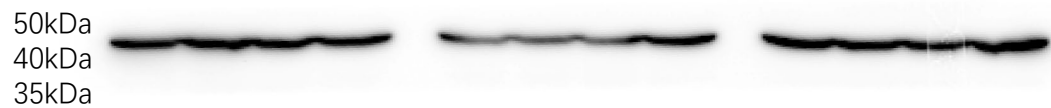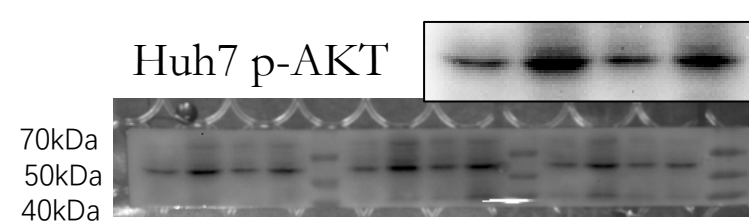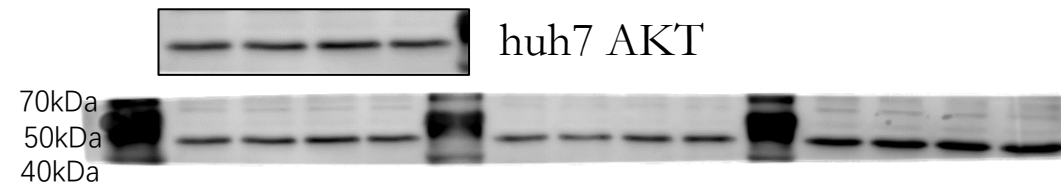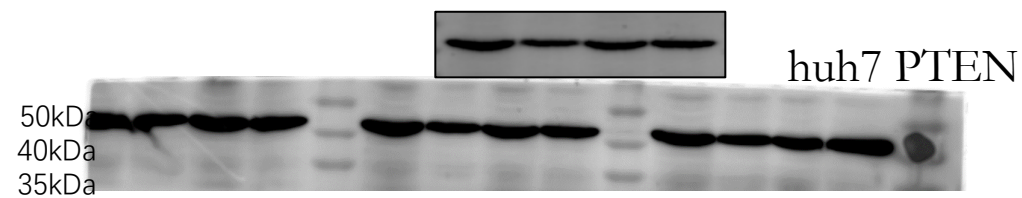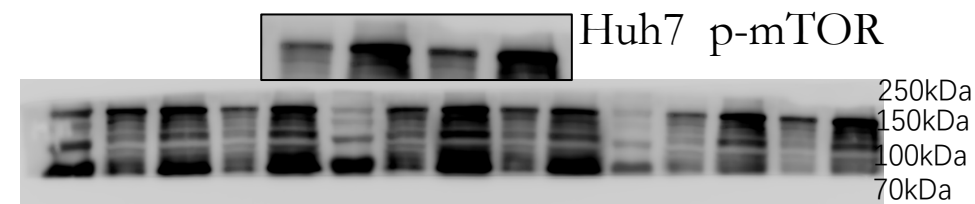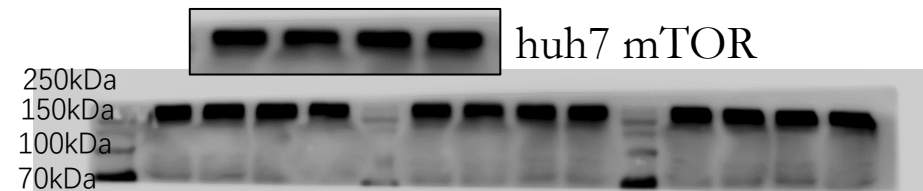

Huh7  $\beta$ -actin

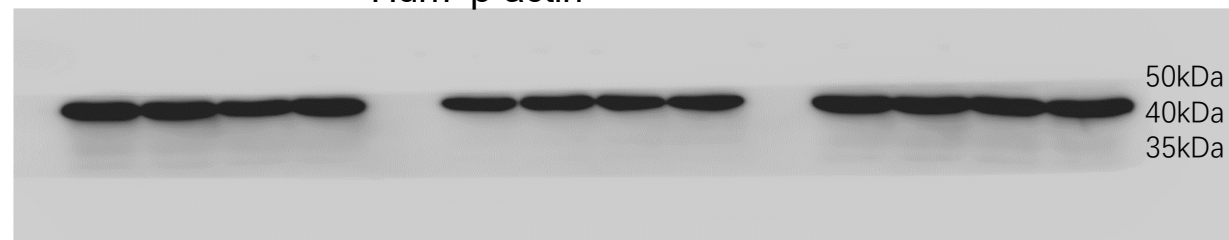

Figure.6C

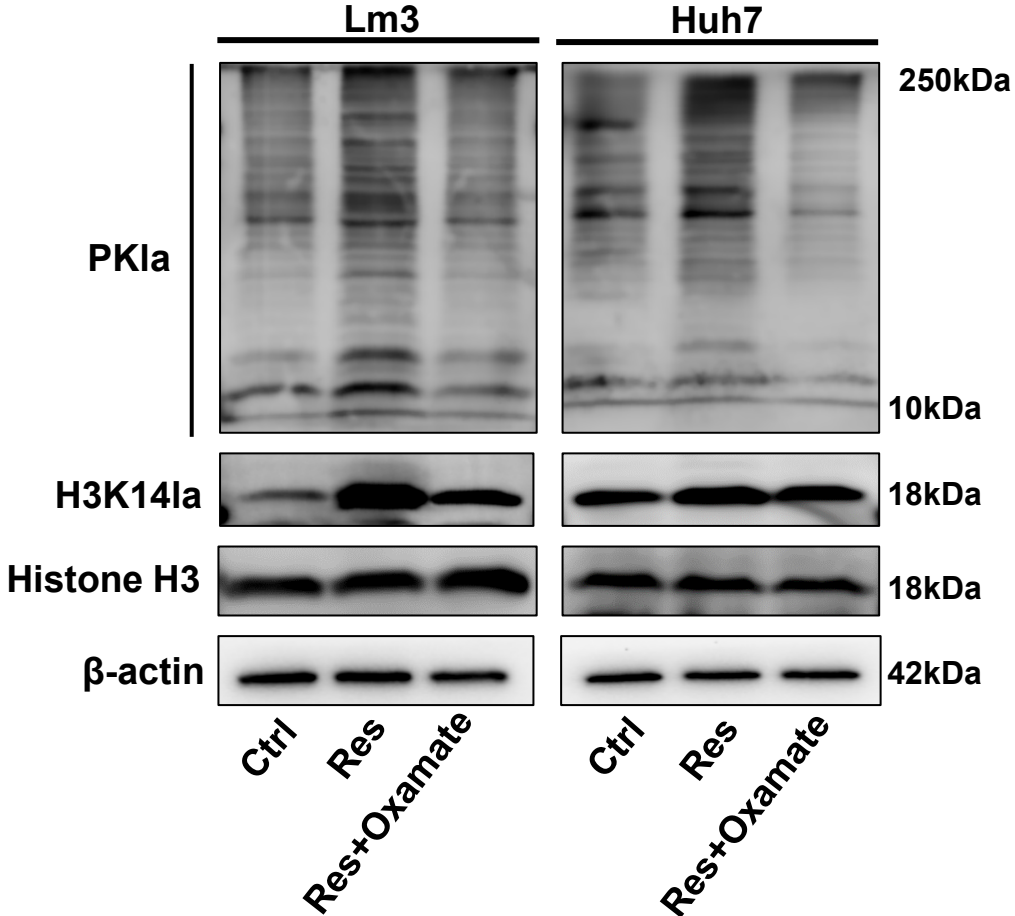

Lm3

**Pk1a 10-250kDa**

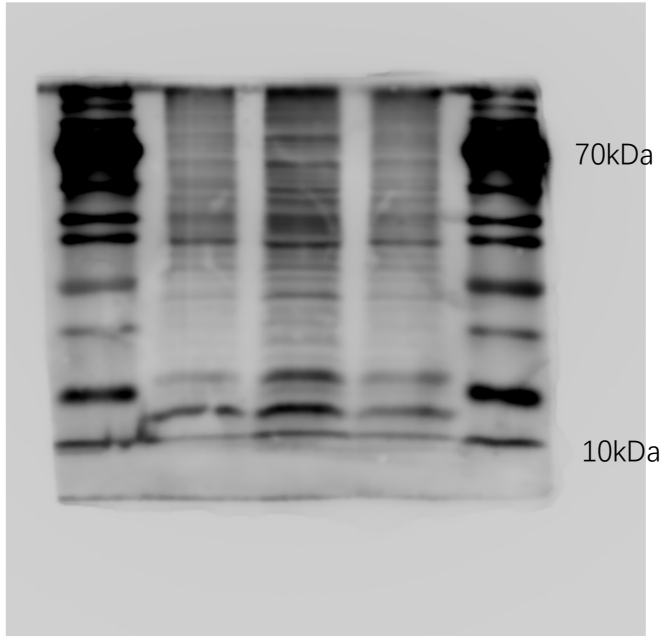

**H3K141a 18kDa**

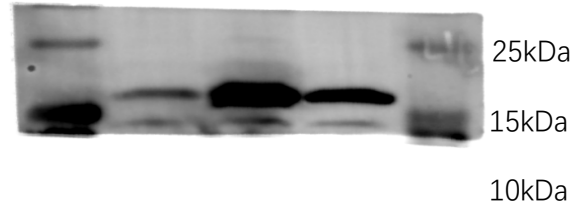

**Histone H3 18kDa**

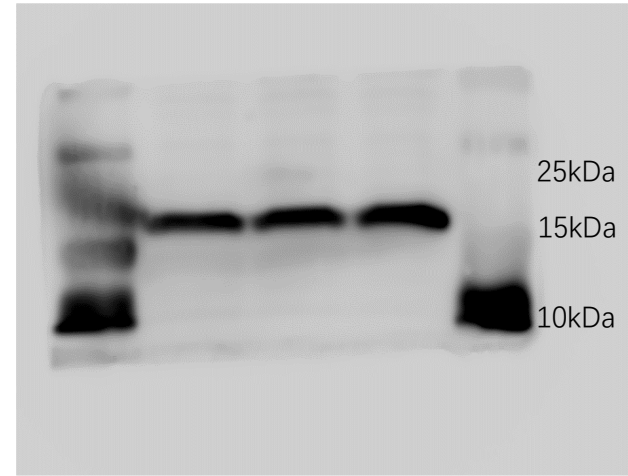

**$\beta$ -actin 42kDa**

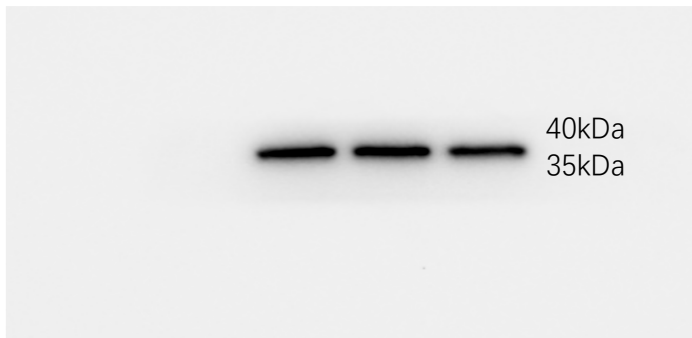

Lm3

**Pk1a 10-250kDa**

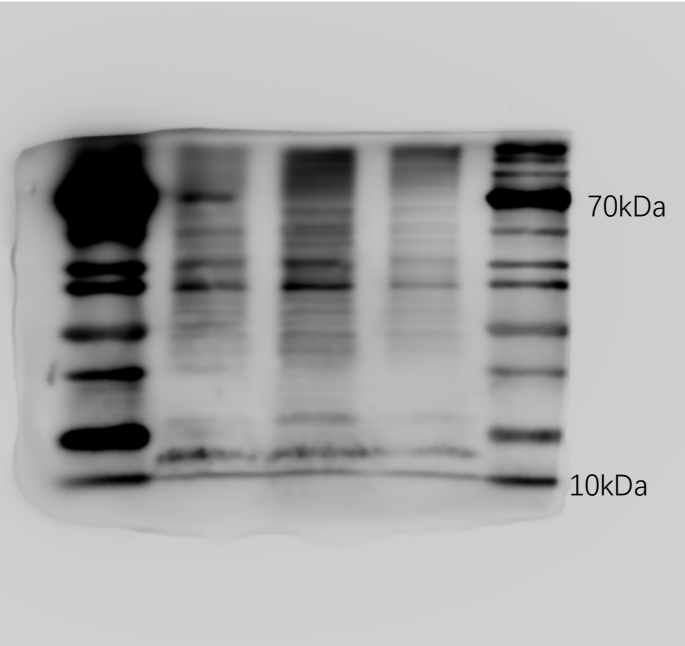

**H3K141a 18kDa**

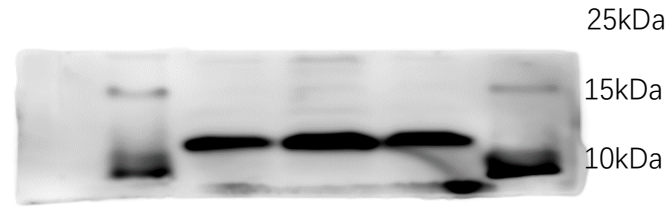

**Histone H3 18kDa**

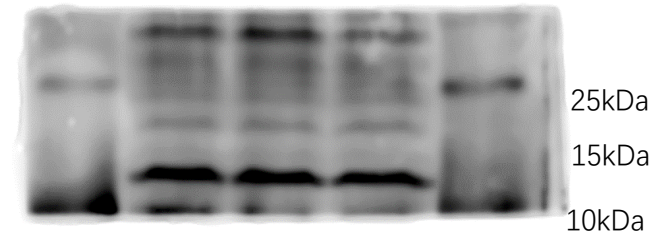

**$\beta$ -actin 42kDa**

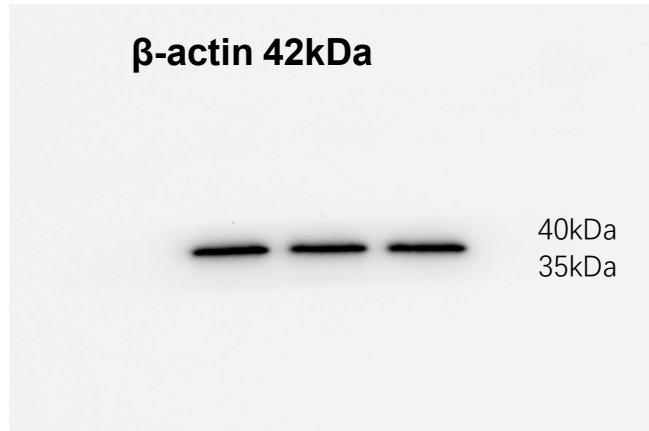



Figure.6D

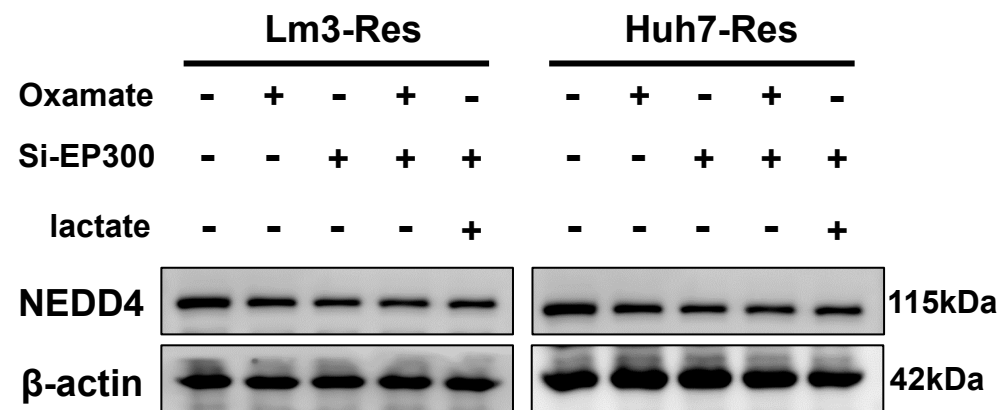

Lm3 NEDD4 115kDa

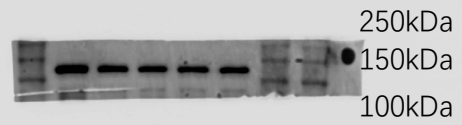

Huh7 NEDD4 115kDa

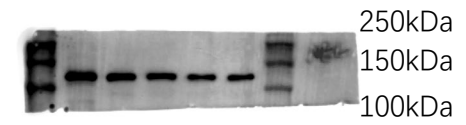

Lm3  $\beta$ -actin 42kDa

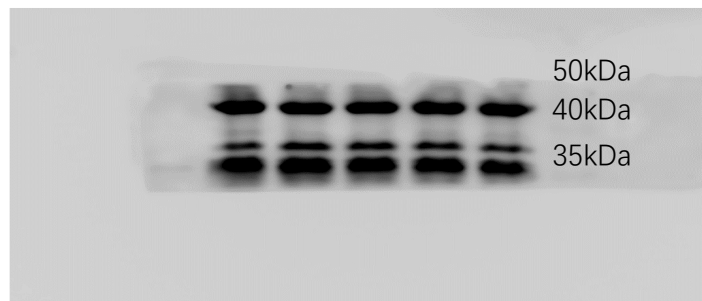

Huh7  $\beta$ -actin 42kDa

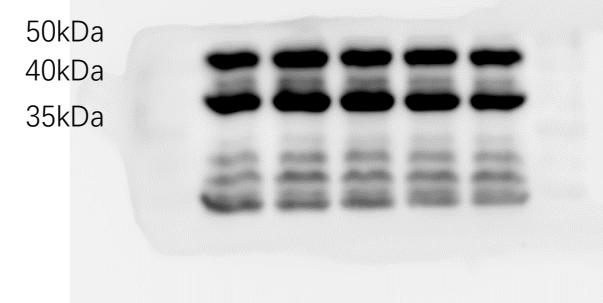

Figure.6E

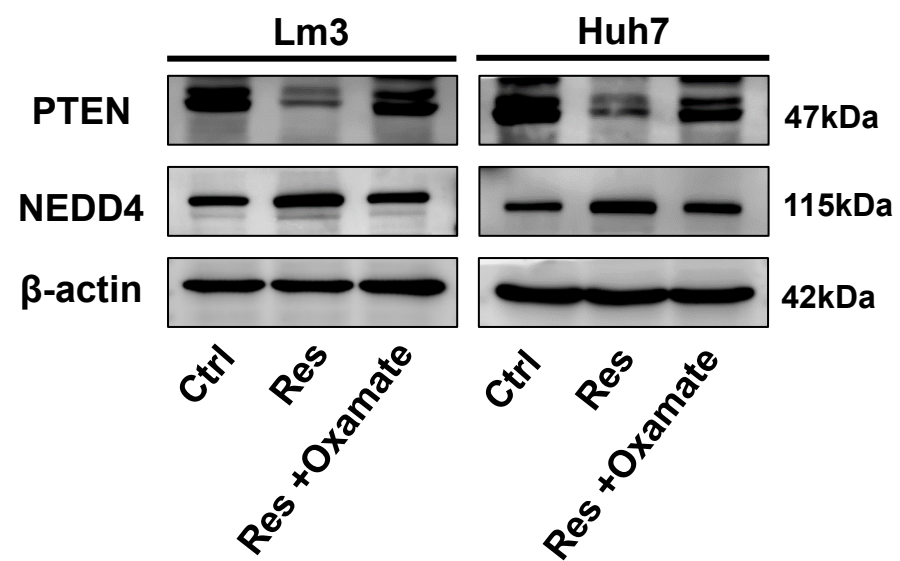

LM3 NEDD4

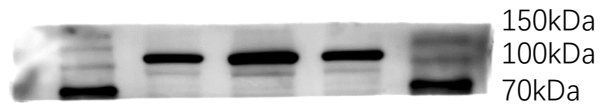

huh7 NEDD4

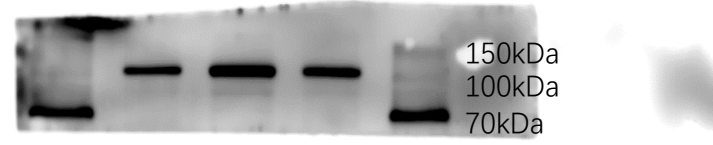

LM3 PTEN

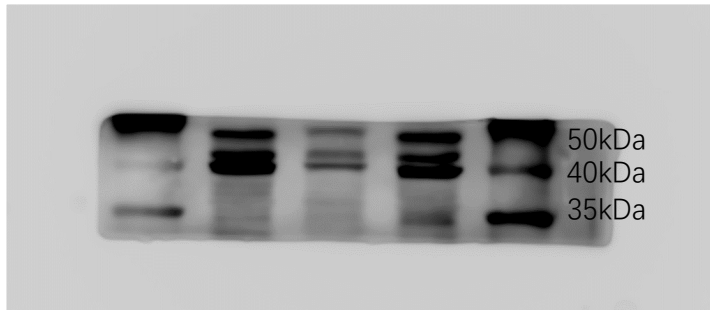

Huh7 PTEN

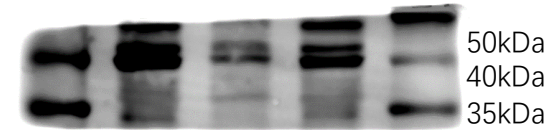

LM3 ACTB

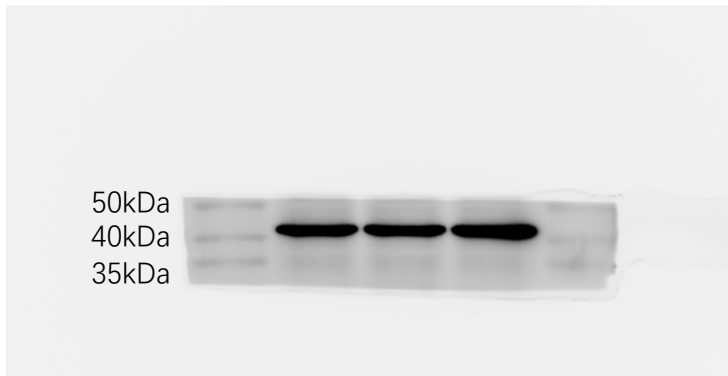

Huh7 ACTB

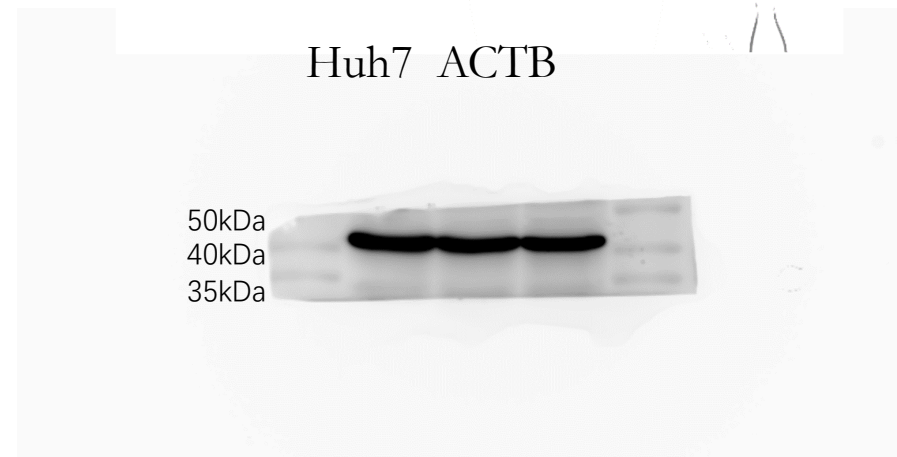

Figure.6H

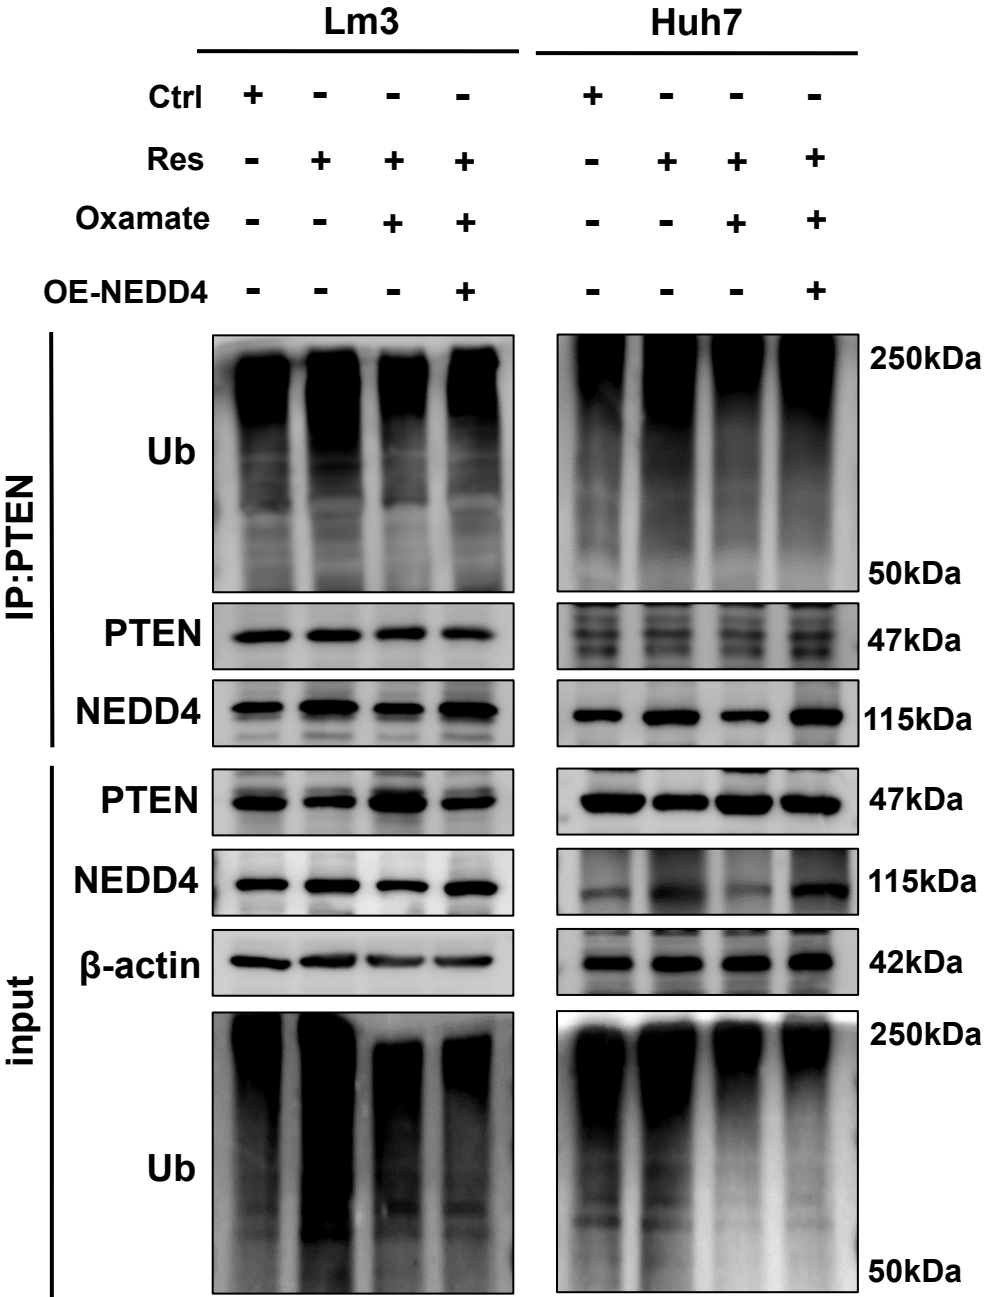

PTEN 47kDa

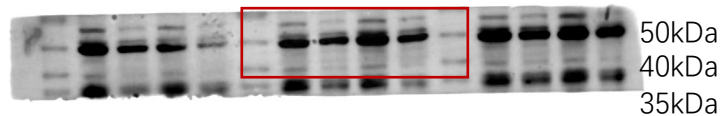

Ub

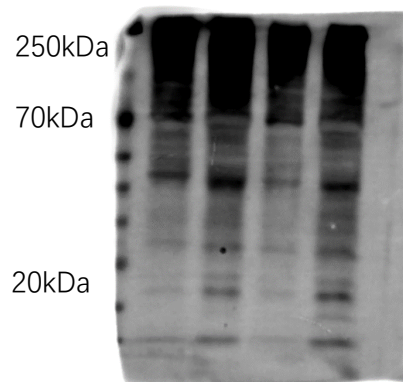

PTEN 47kDa

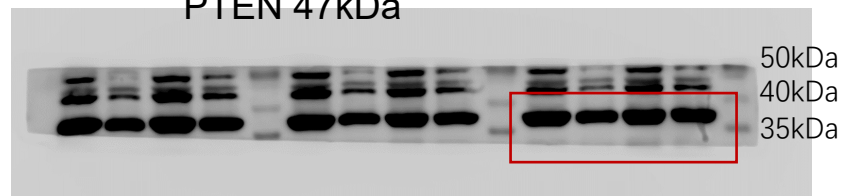

PTEN 47kDa

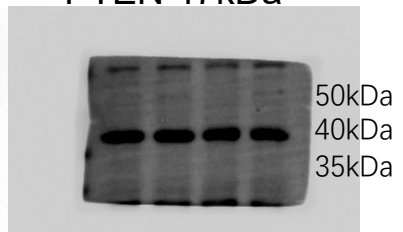

NEDD4 115kDa

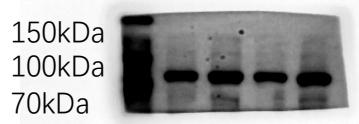

NEDD4 115kDa

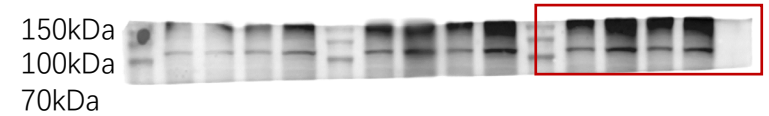

$\beta$ -actin 42kDa

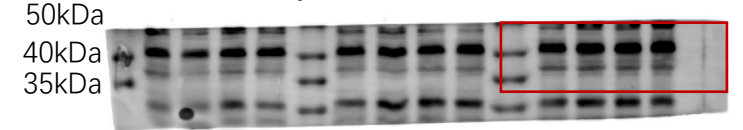

$\beta$ -actin 42kDa

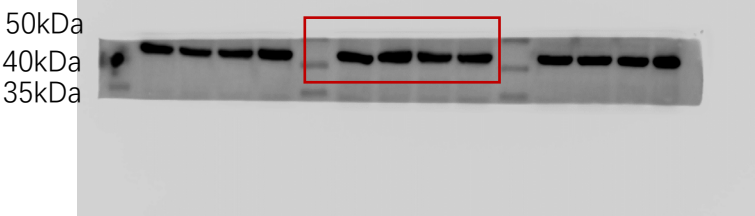

Ub

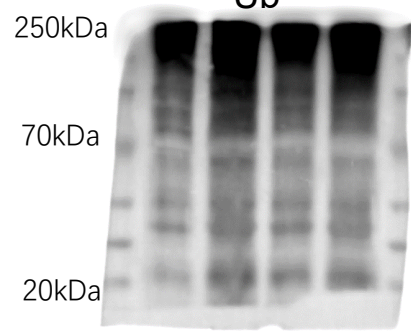

PTEN 47kDa

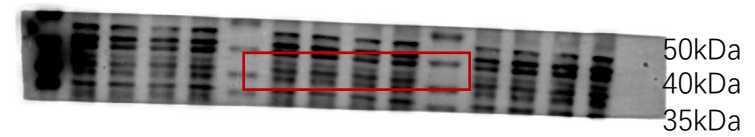

NEDD4 115kDa

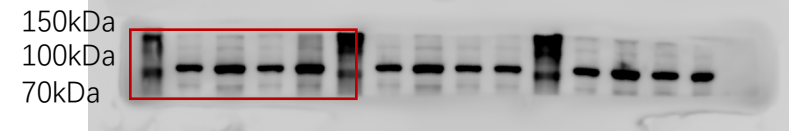

NEDD4 115kDa

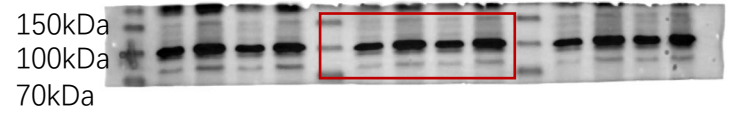

Figure.7E

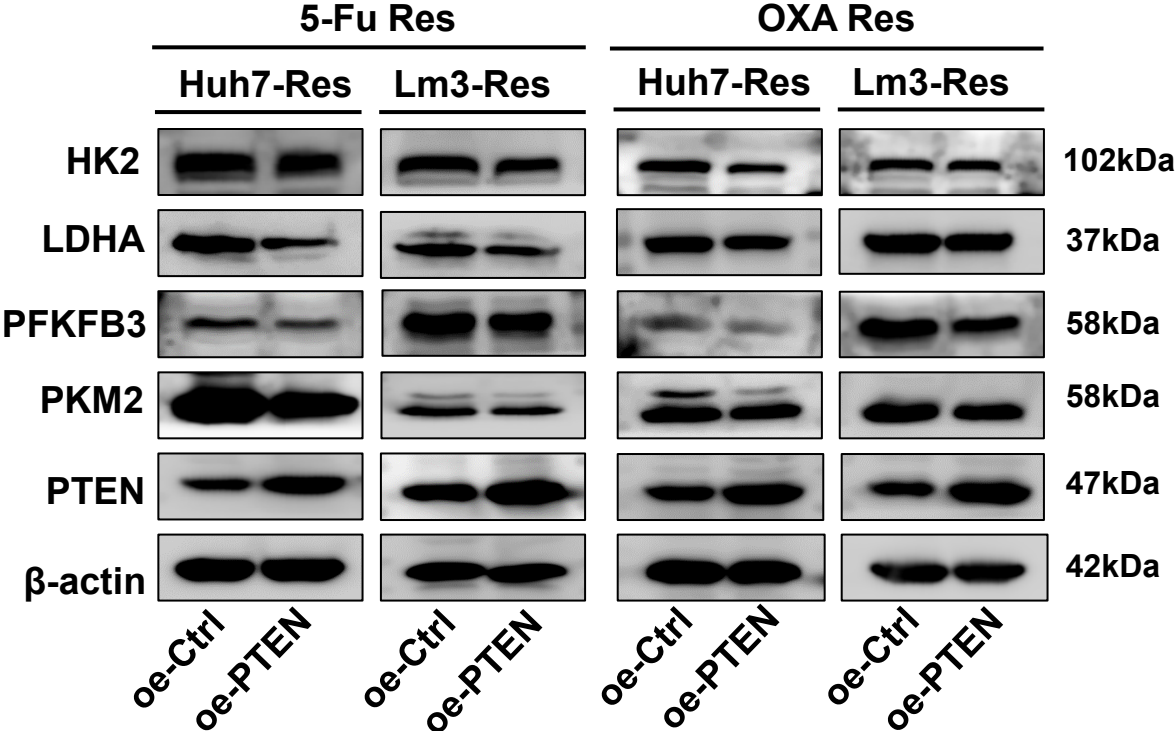

Huh7-Res HK2 102kDa

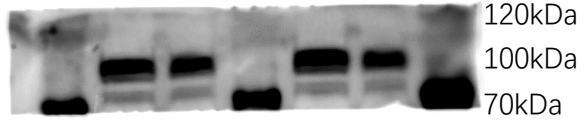

Huh7-Res PTEN 47kDa

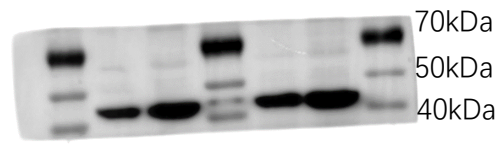

Lm3-Res HK2 102kDa

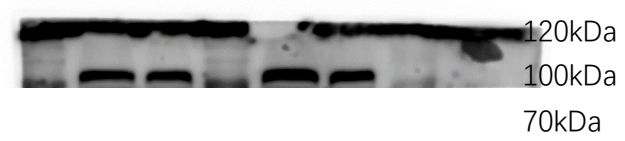

Lm3-Res PTEN 47kDa

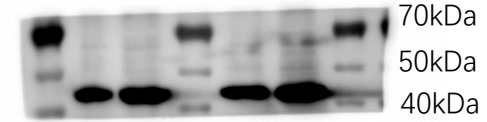

Huh7-Res LDHA 37kDa

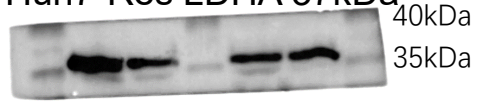

Lm3-Res LDHA 37kDa

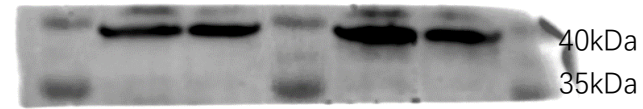

Huh7-Res PFKFB3 58kDa

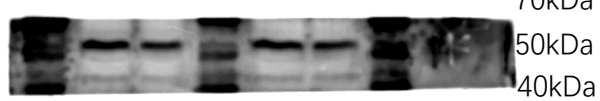

Lm3-Res PFKFB3 58kDa

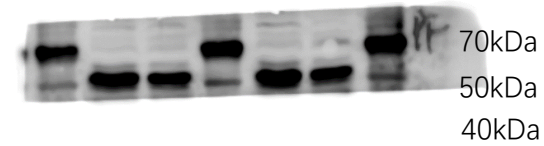

Huh7-Res PKM2 58kDa

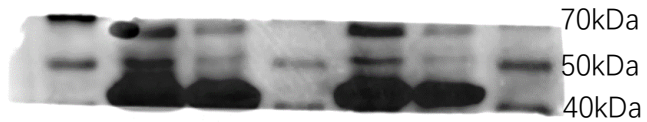

Lm3-Res PKM2 58kDa

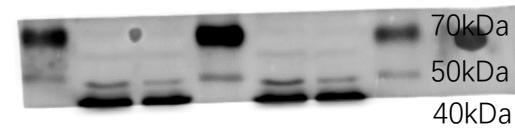

Huh7-Res  $\beta$ -actin 42kDa

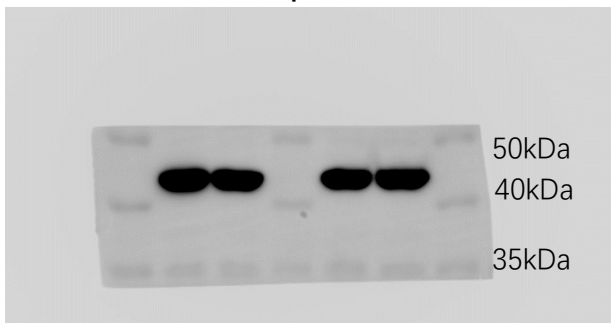

Lm3-Res  $\beta$ -actin 42kDa

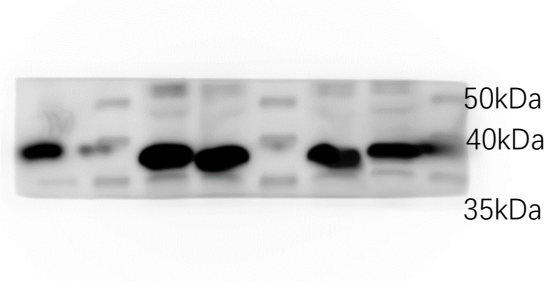



Huh7-Res HK2 102kDa

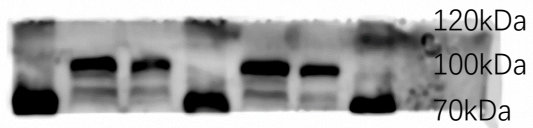

Huh7-Res  $\beta$ -actin 42kDa

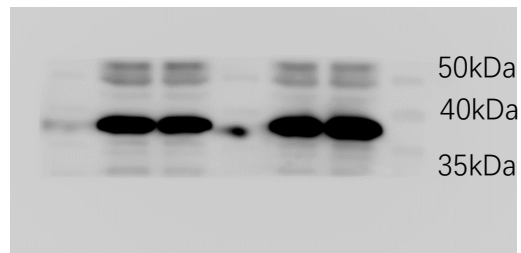

Lm3-Res HK2 102kDa

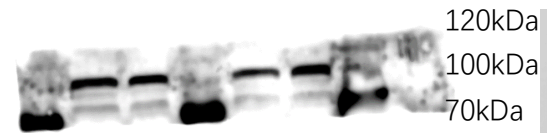

Lm3-Res  $\beta$ -actin 42kDa

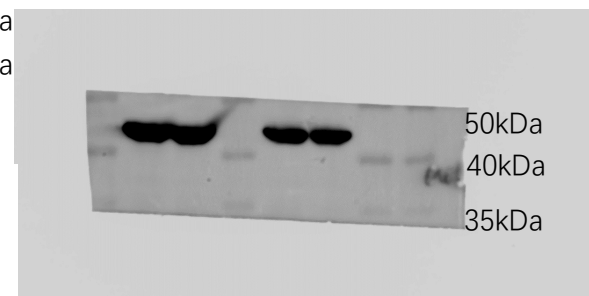

Huh7-Res LDHA 37kDa

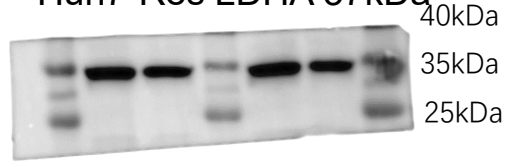

Lm3-Res LDHA 37kDa

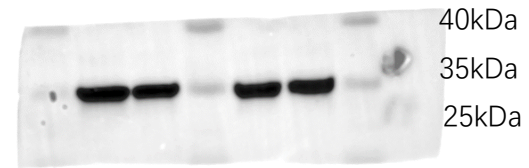

Huh7-Res PFKFB3 58kDa

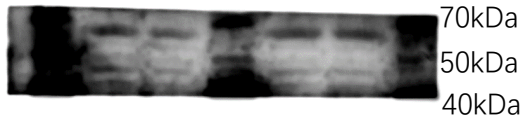

Lm3-Res PFKFB3 58kDa

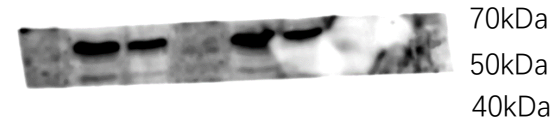

Huh7-Res PKM2 58kDa

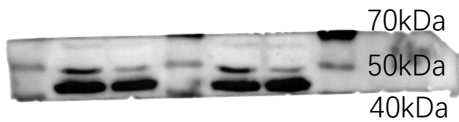

Lm3-Res PKM2 58kDa

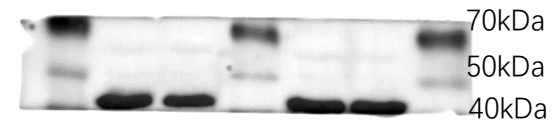

Huh7-Res PTEN 47kDa

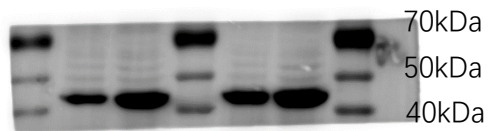

Lm3-Res PTEN 47kDa

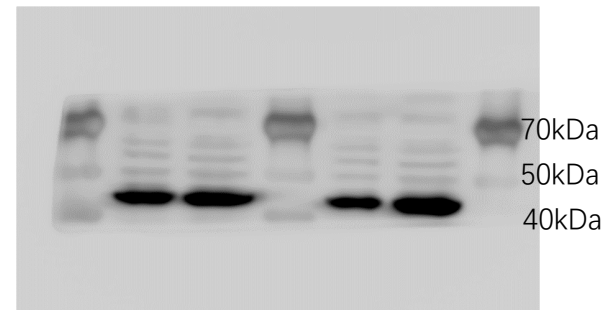

Figure.7F

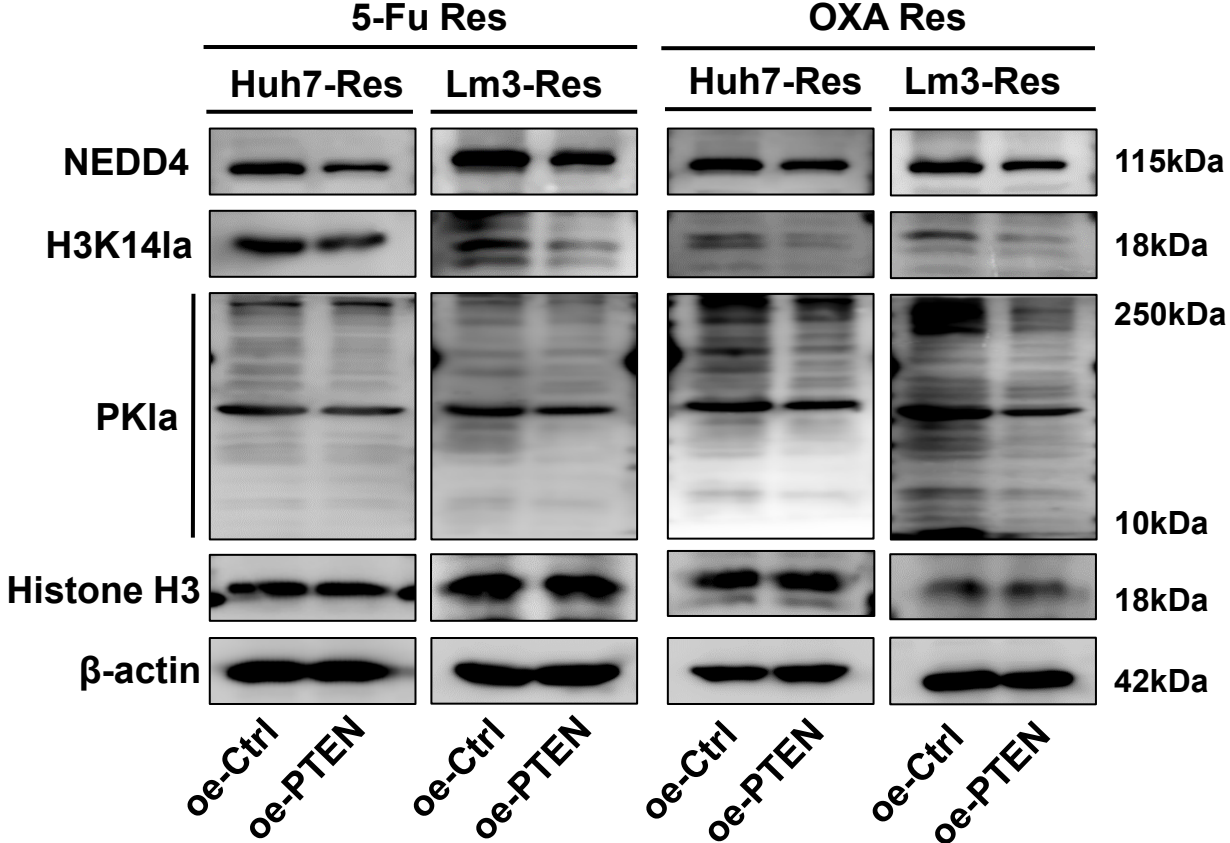

Huh7-Res NEDD4 115kDa

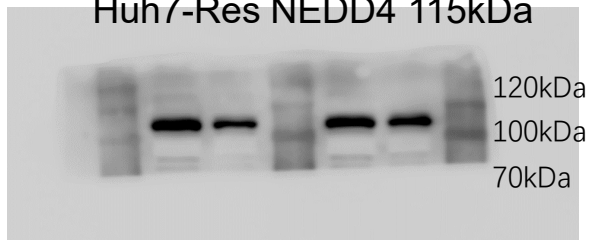

Huh7-Res  $\beta$ -actin 42kDa

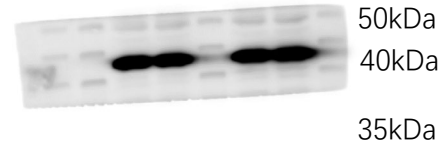

Lm3-Res NEDD4 115kDa

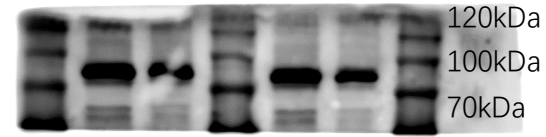

Lm3-Res  $\beta$ -actin 42kDa

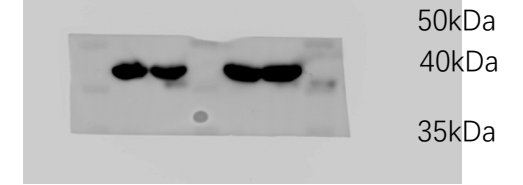

Huh7-Res H3K14Ia 18kDa

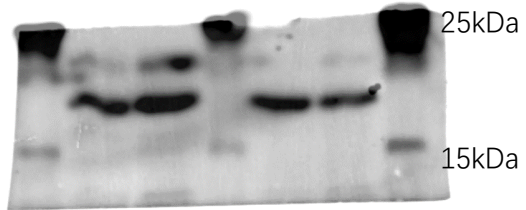

Lm3-Res H3K14Ia 18kDa

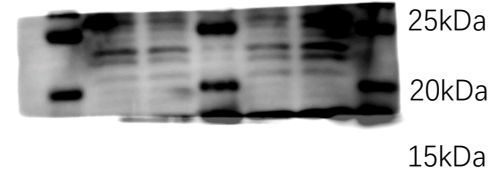

Huh7-Res PkIa

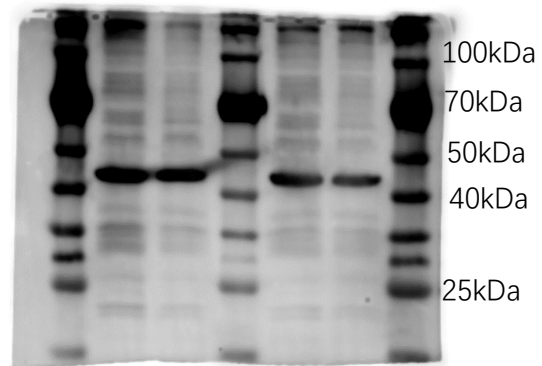

Lm3-Res PkIa

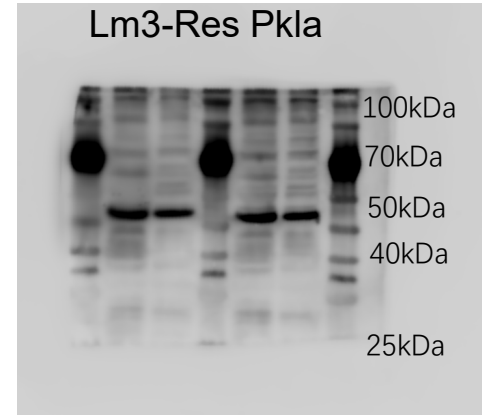

Huh7-Res Histone H3 18kDa

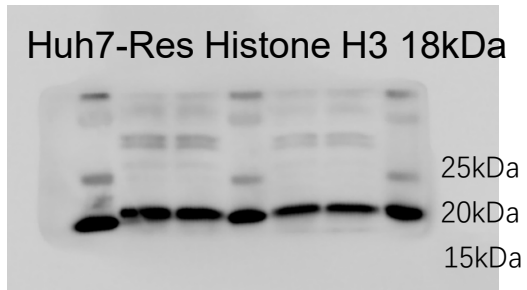

Lm3-Res Histone H3 18kDa

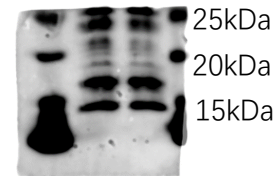

Huh7-Res NEDD4 115kDa

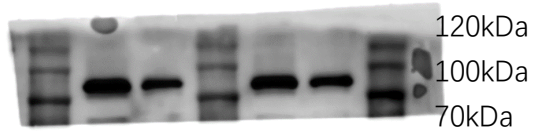

Huh7-Res  $\beta$ -actin 42kDa

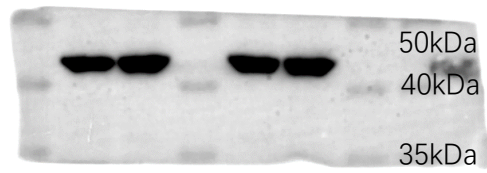

Lm3-Res NEDD4 115kDa

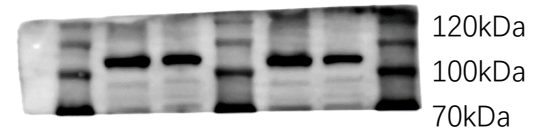

Lm3-Res  $\beta$ -actin 42kDa

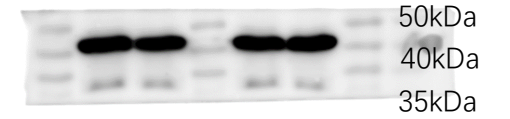

Huh7-Res H3K14Ia 18kDa

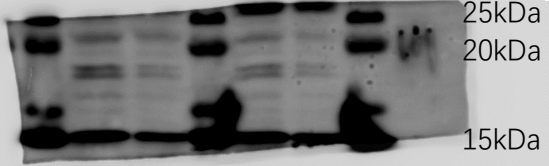

Lm3-Res H3K14Ia 18kDa

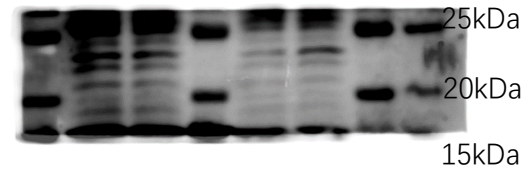

Huh7-Res PkIa

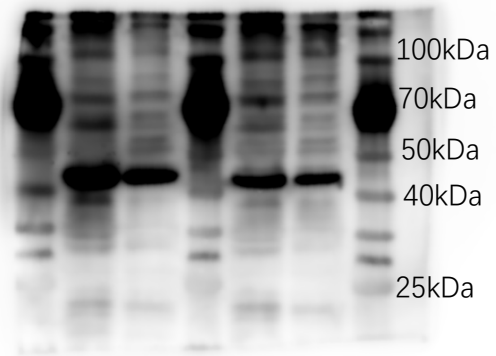

Lm3-Res PkIa

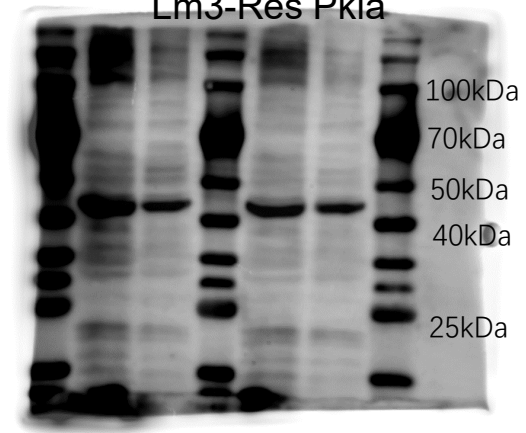

Huh7-Res Histone H3 18kDa

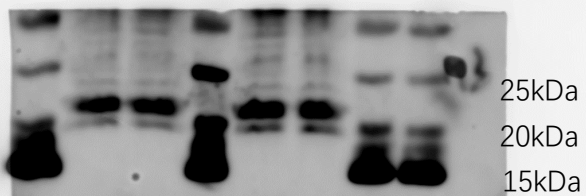

Lm3-Res Histone H3 18kDa

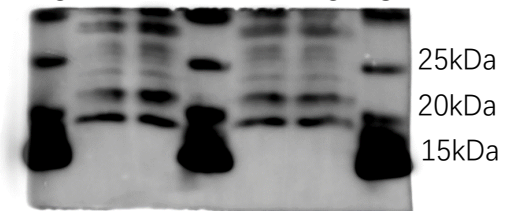

Figure.8D-G

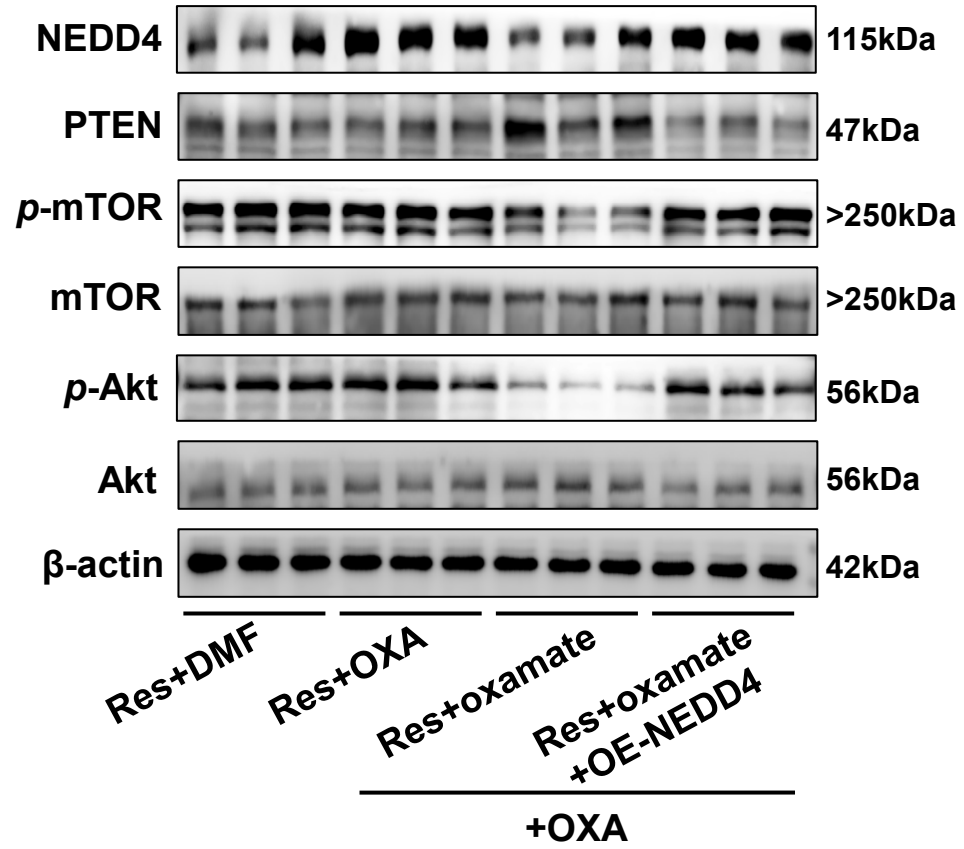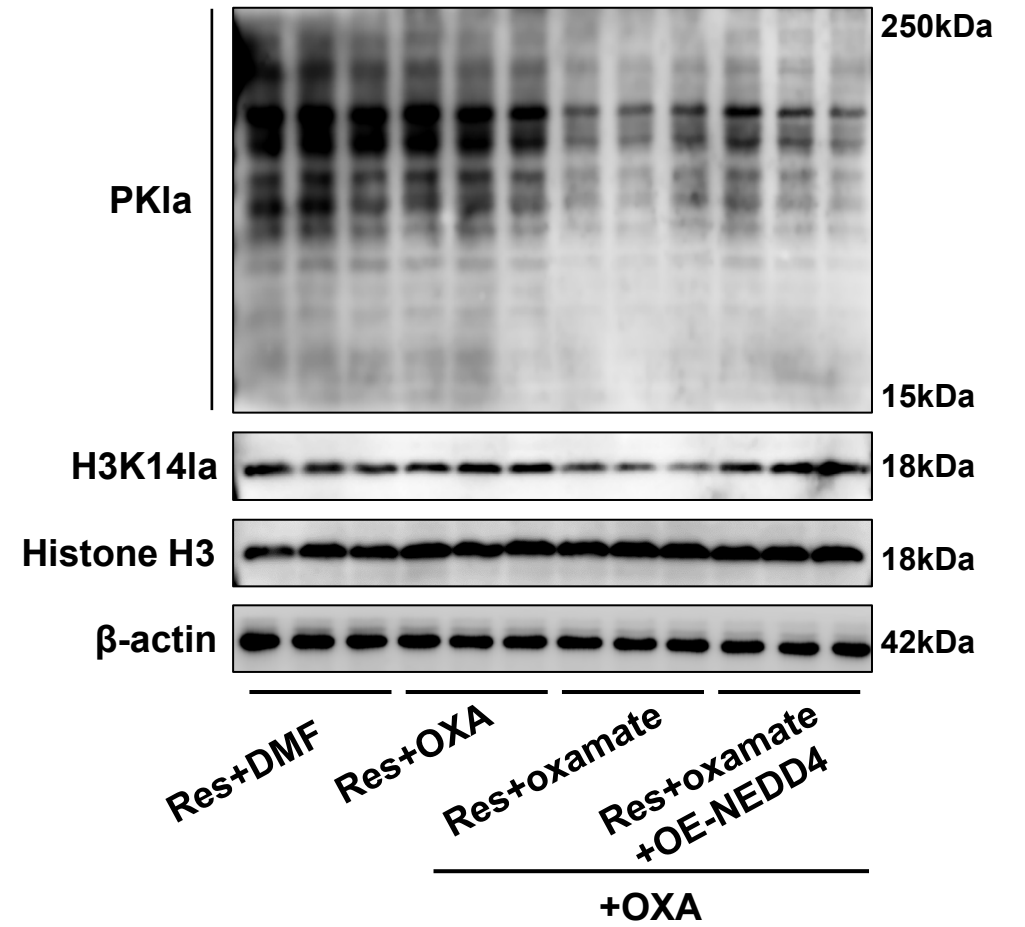

NEDD4 115kDa

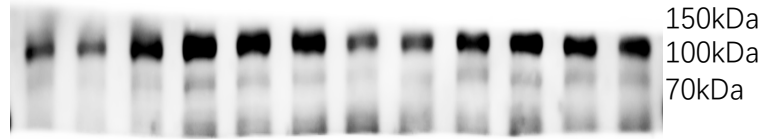

*p*-Akt 56kDa

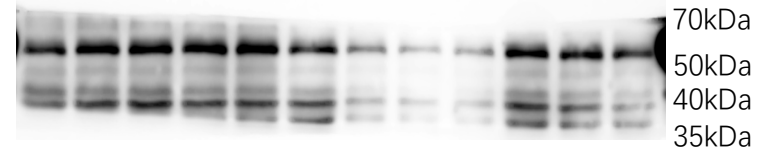

PTEN 47kDa

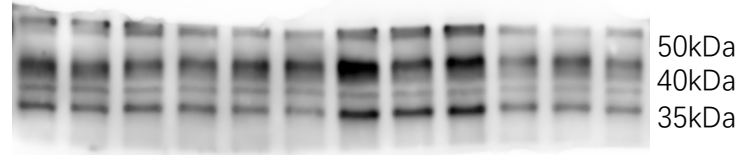

Akt 56kDa

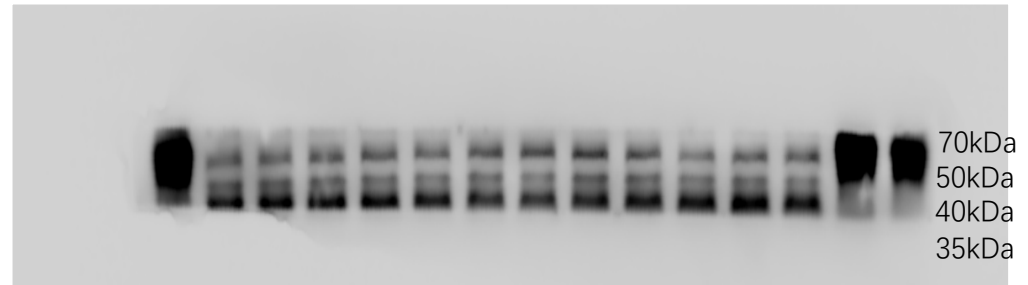

*p*-mTOR 250kDa

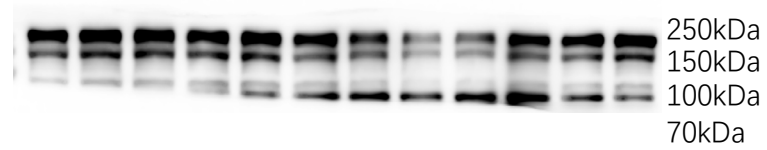

mTOR 250kDa

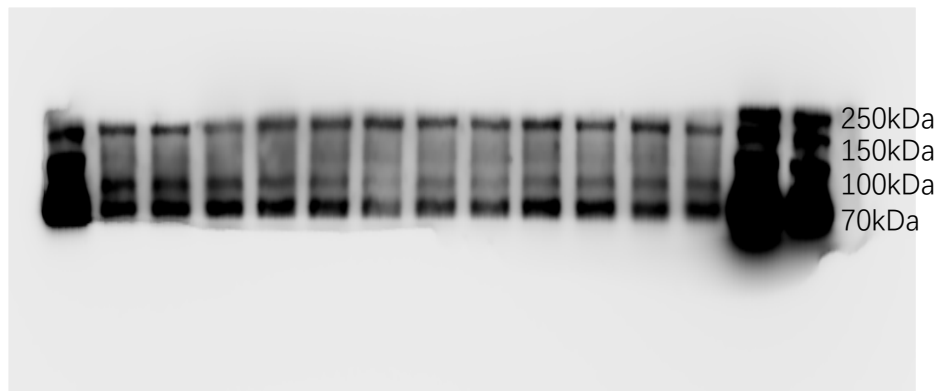

$\beta$ -actin 42kDa

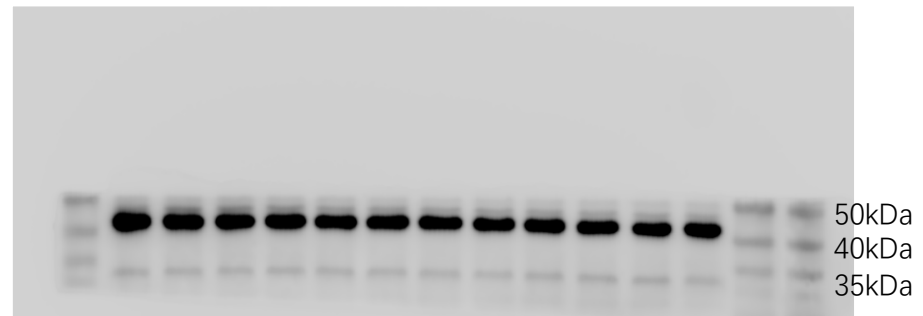

**Pk1a 10-250kDa**

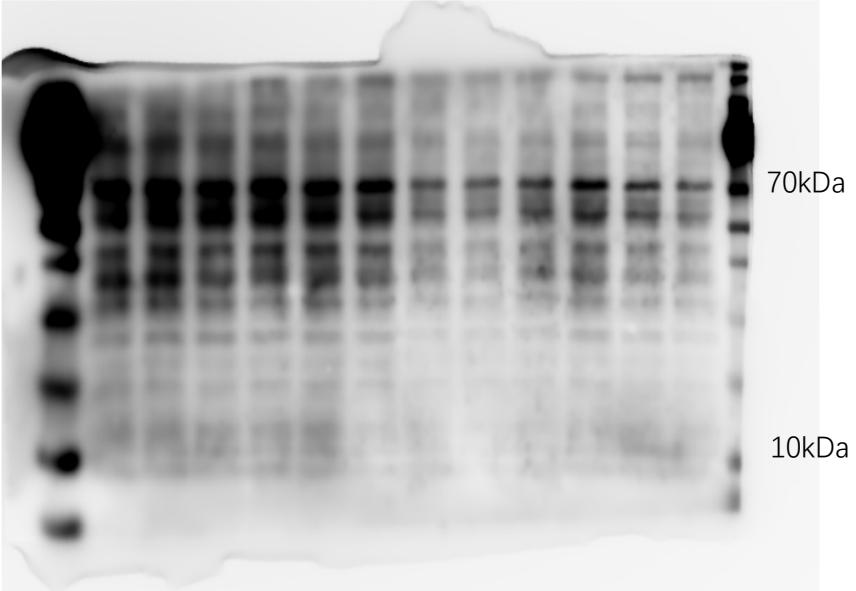

**H3K141a 18kDa**

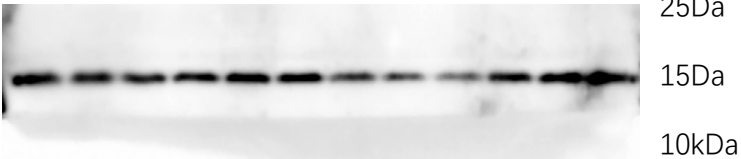

**Histone H3 18kDa**

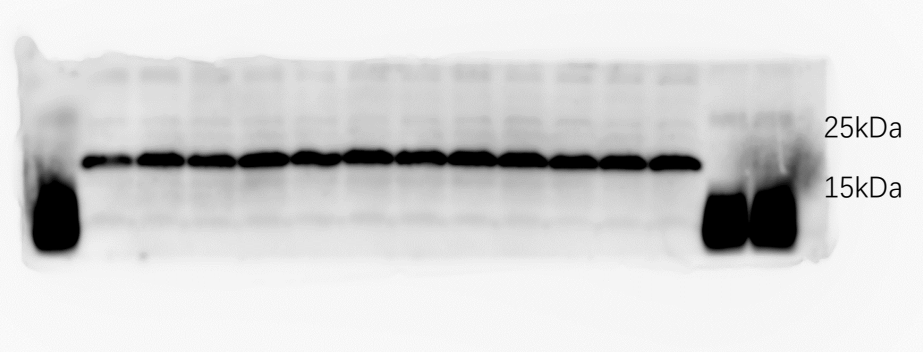

**$\beta$ -actin 42kDa**

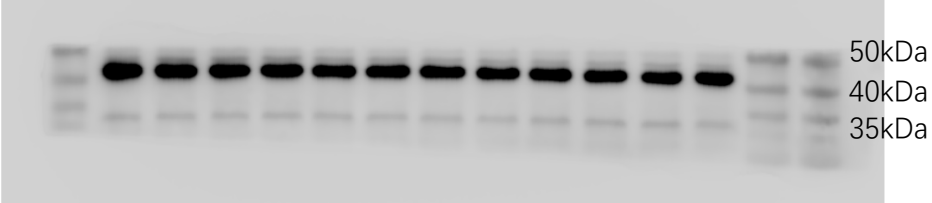

# S1.D

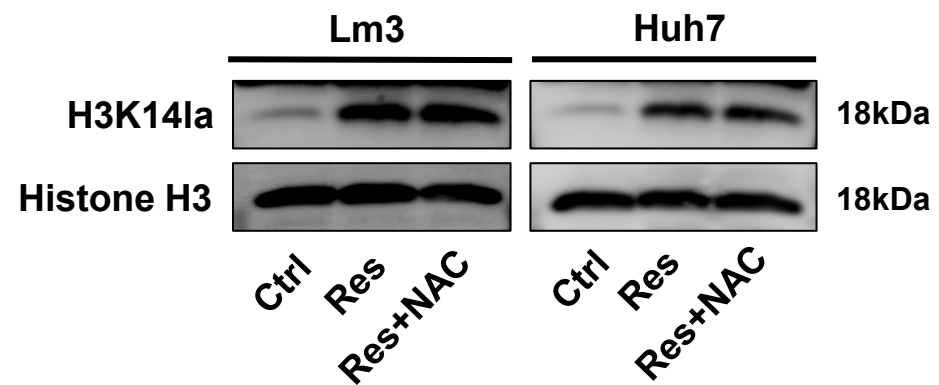



**H3K14Ia 18kDa**

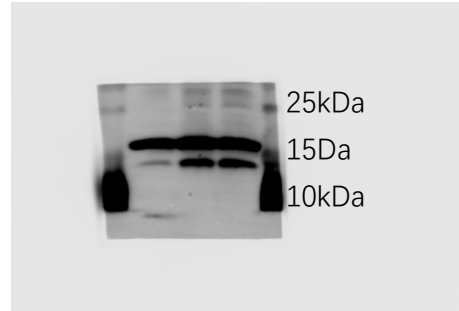

**H3K14Ia 18kDa**

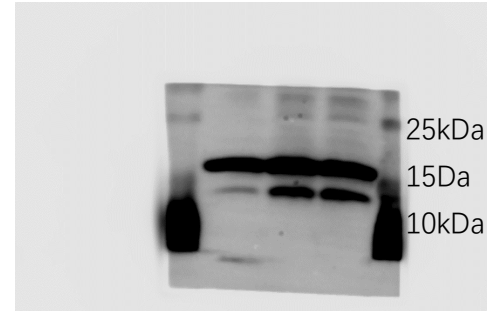

**Histone H3 18kDa**

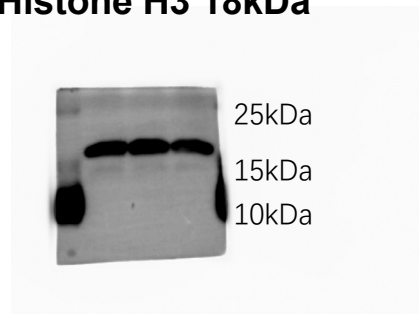

**Histone H3 18kDa**

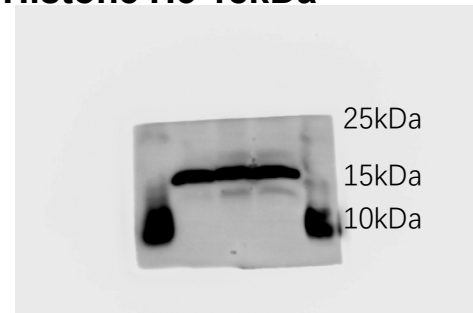

# S2.C

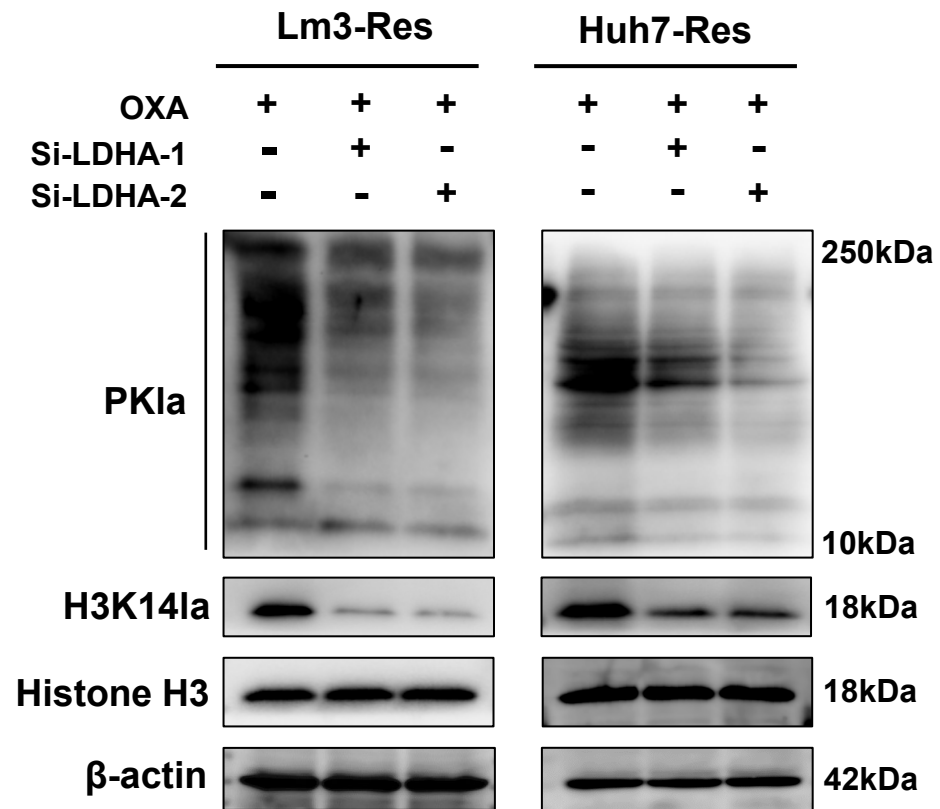

**Lm3-Res**

**Pk1a 10-250kDa**

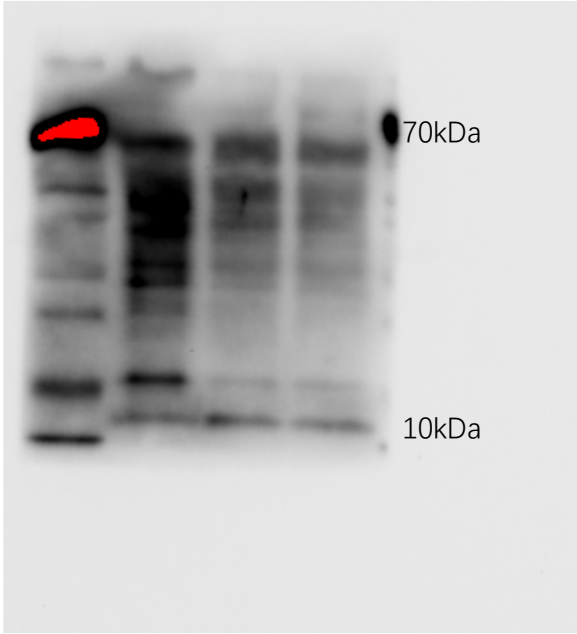

**H3K141a 18kDa**

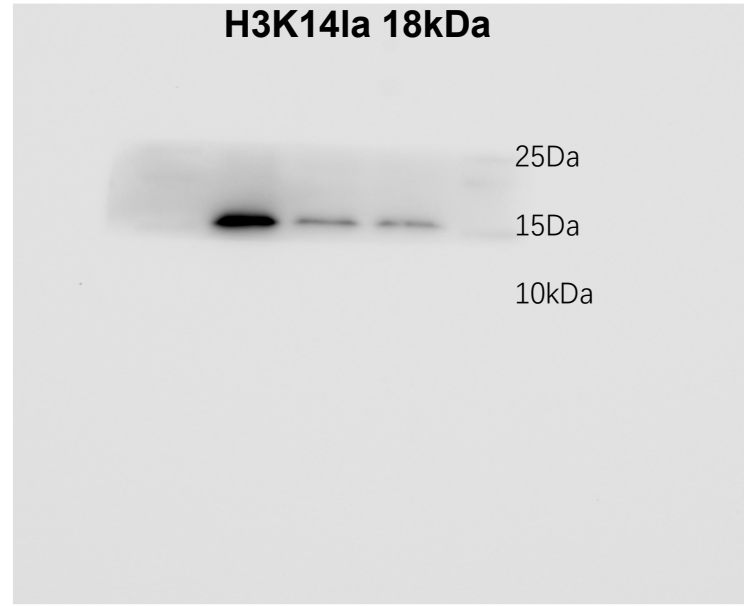

**Histone H3 18kDa**

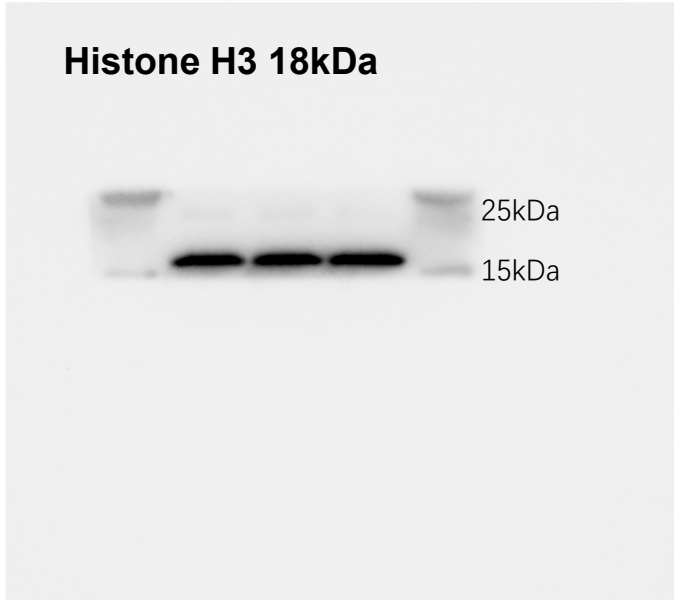

**$\beta$ -actin 42kDa**

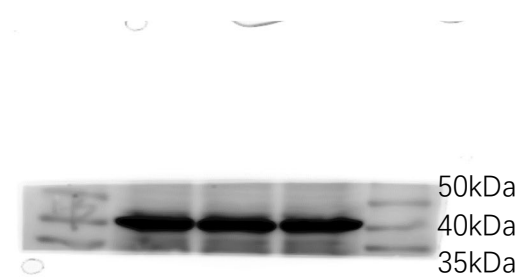

**Lm3-Res**

**Pk1a 10-250kDa**

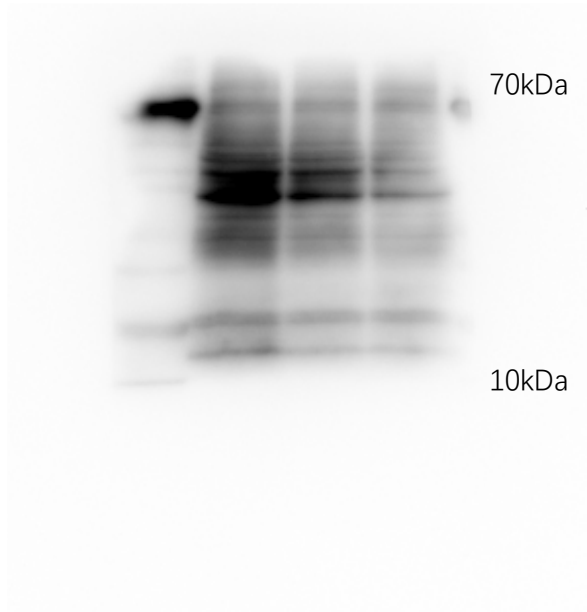

**H3K141a 18kDa**

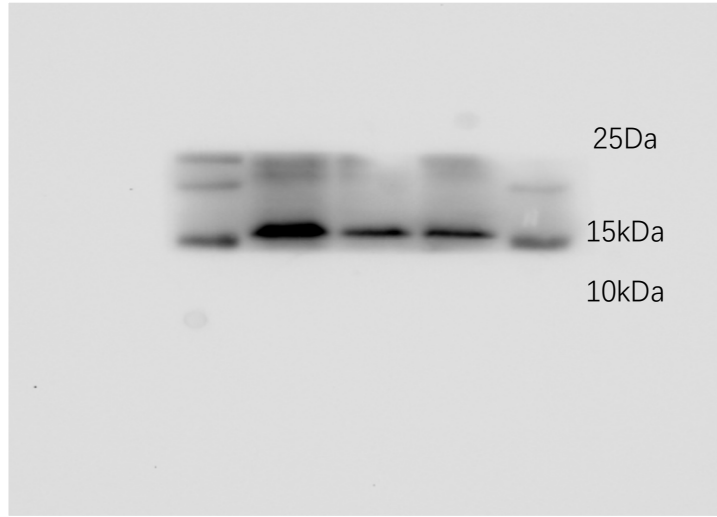

**Histone H3 18kDa**

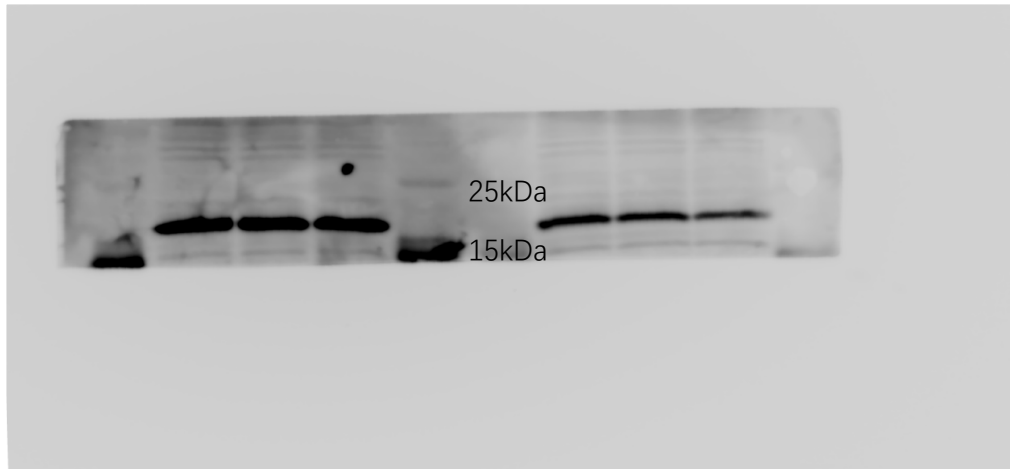

**$\beta$ -actin 42kDa**

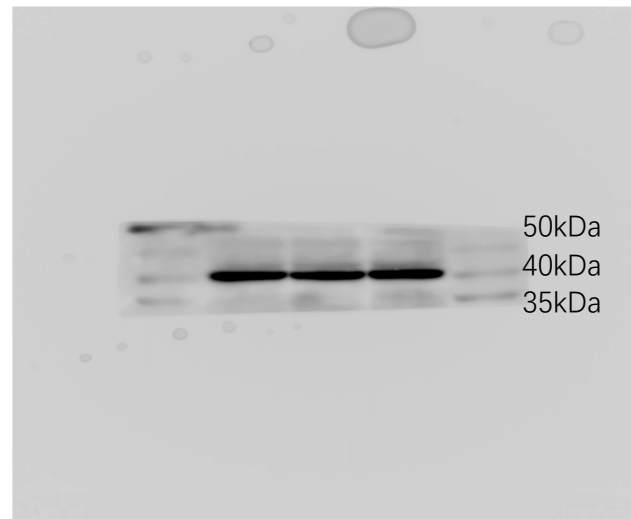

# S3.C

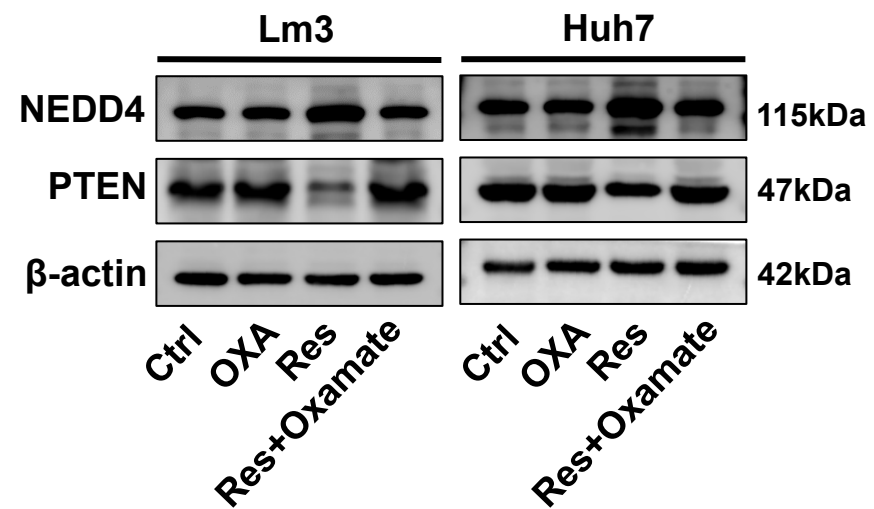

LM3 NEDD4

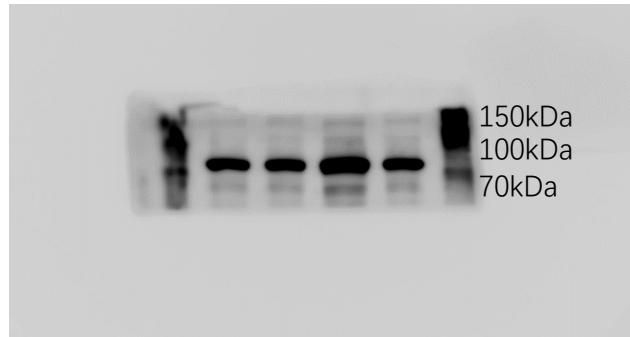

huh7 NEDD4

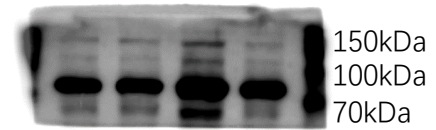

LM3 PTEN

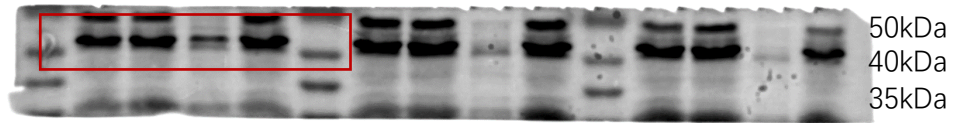

huh7 PTEN

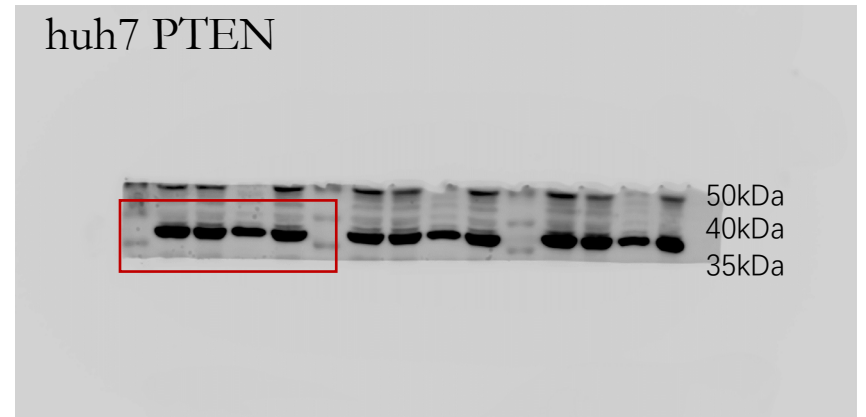

LM3 ACTB

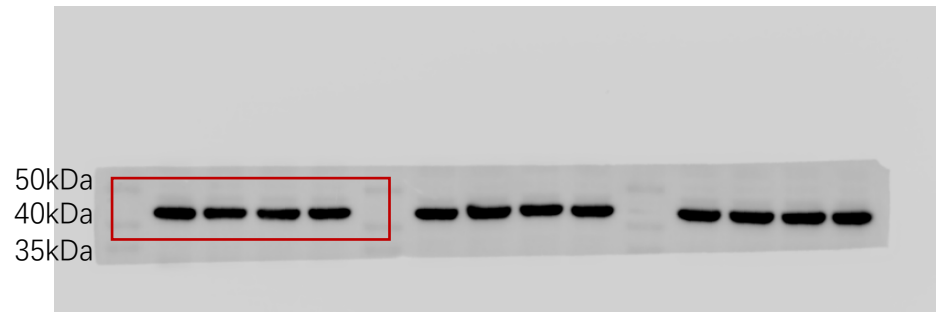

huh7 ACTB

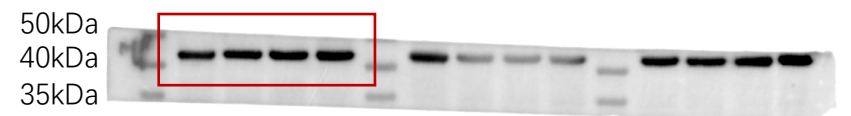

# S3.D

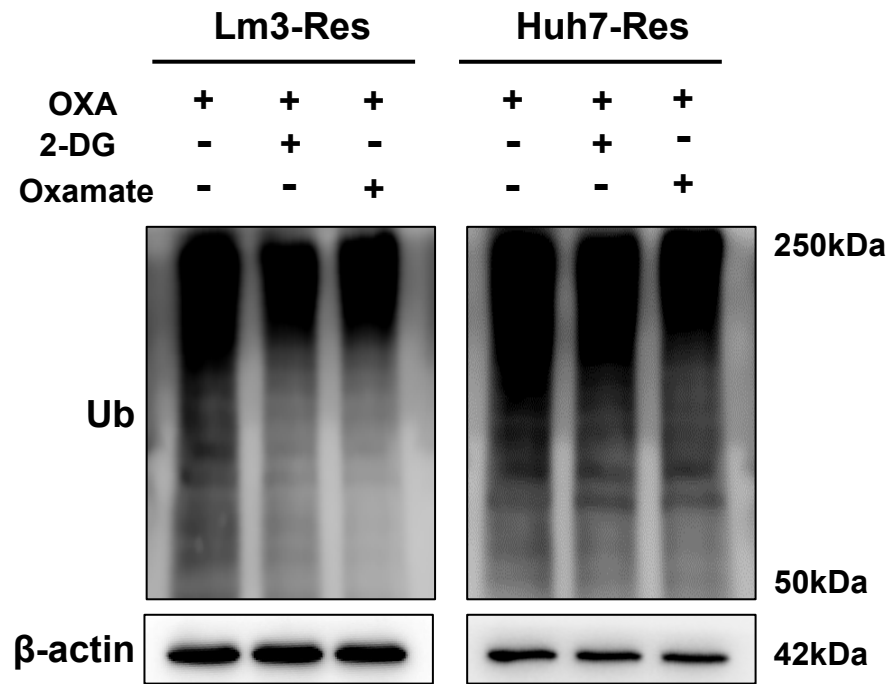

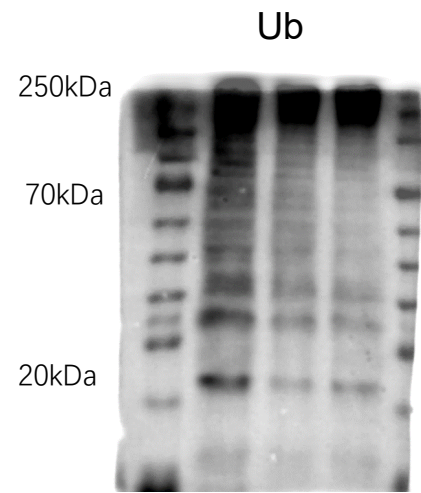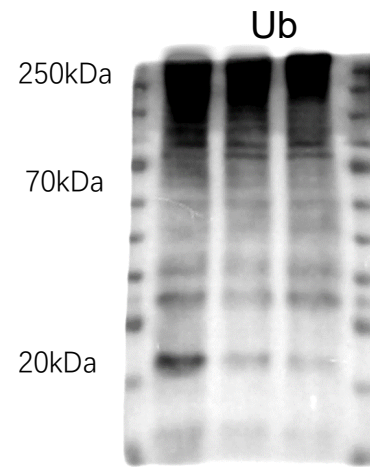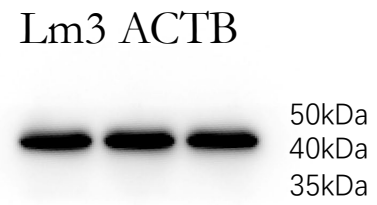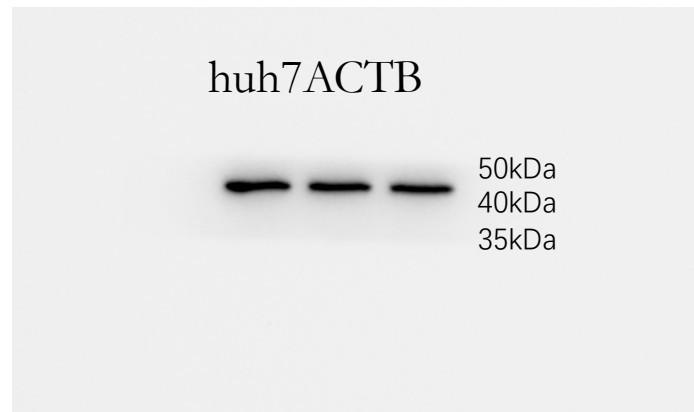



# S3.F

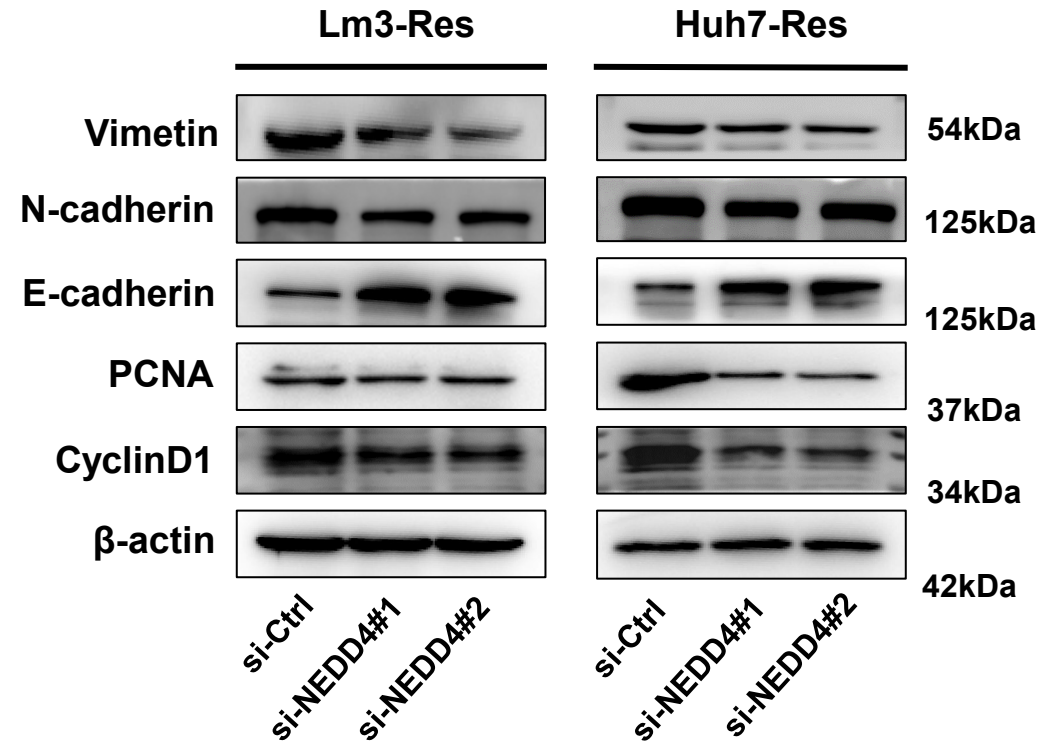

Lm3 N-cadherin

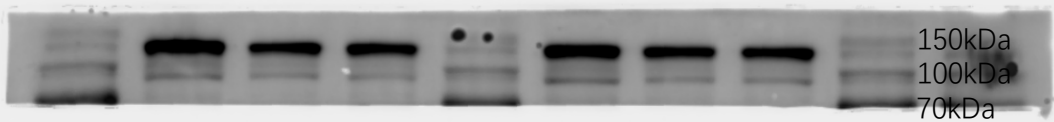

Lm3 PCNA

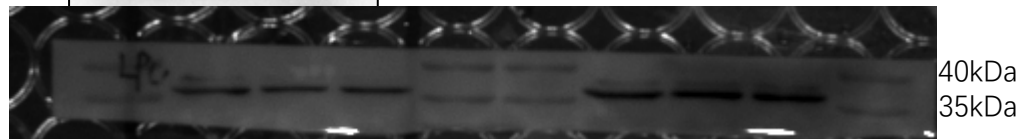

Lm3 E-CA

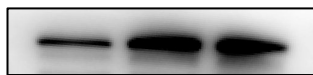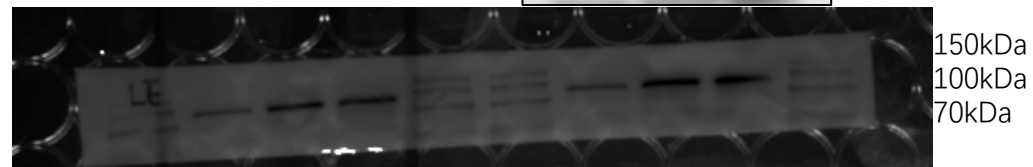

Lm3 Vimetin

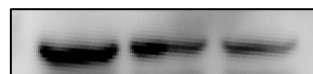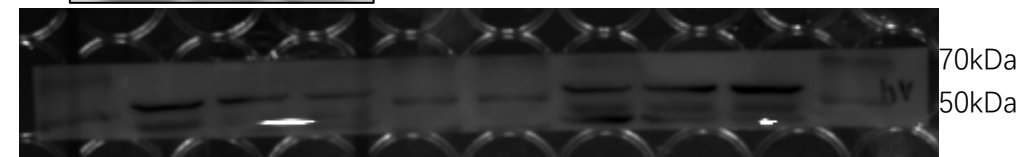

Lm3 CYD

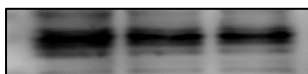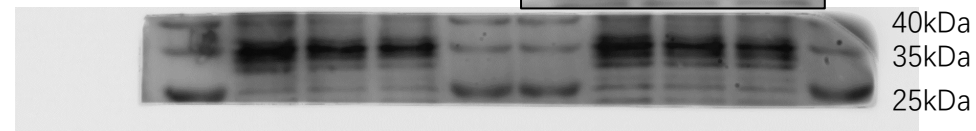

Lm3 ACTB

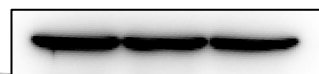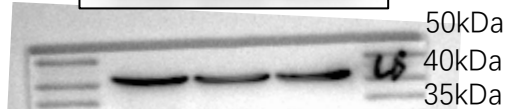

Huh7 E-cadherin

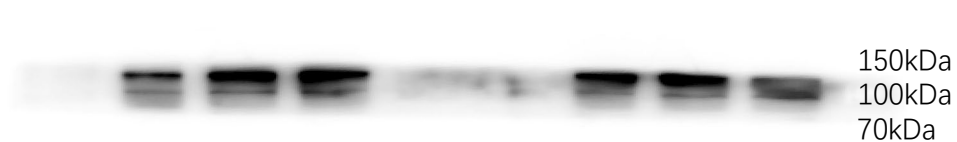

Huh7 N-cadherin

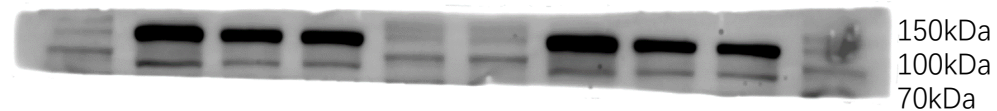

Huh7 PCNA

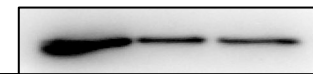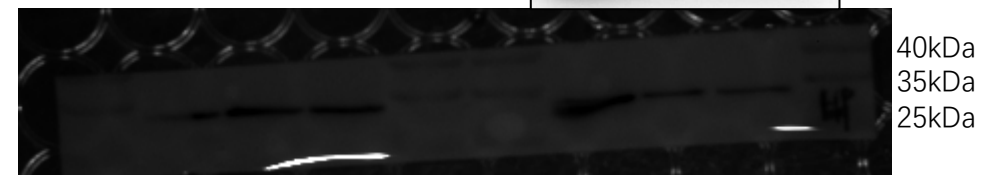

huh7 Vimetin

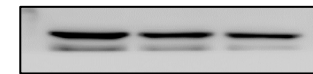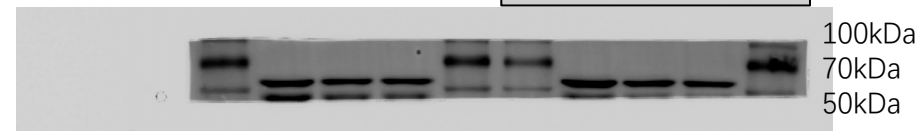

huh7 CYD

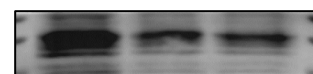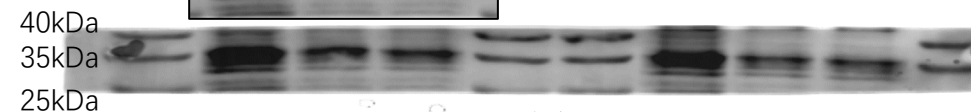

Huh7 ACTB

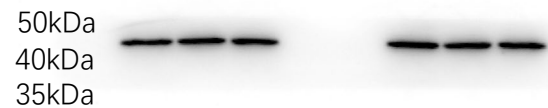

# S5.A

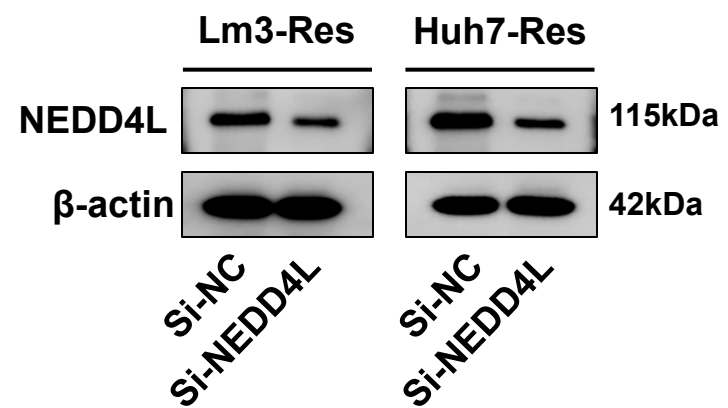

NEDD4L 112kDa

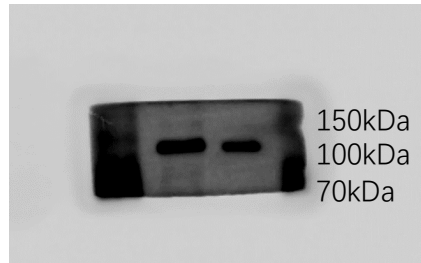

NEDD4L 112kDa

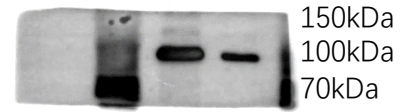

$\beta$ -actin 42kDa

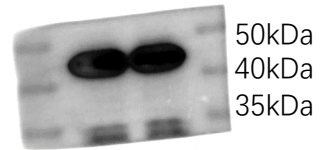

$\beta$ -actin 42kDa

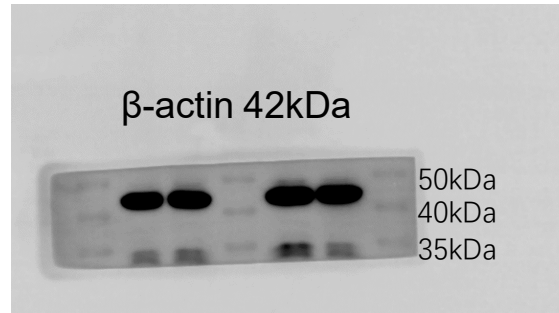

# S5.B

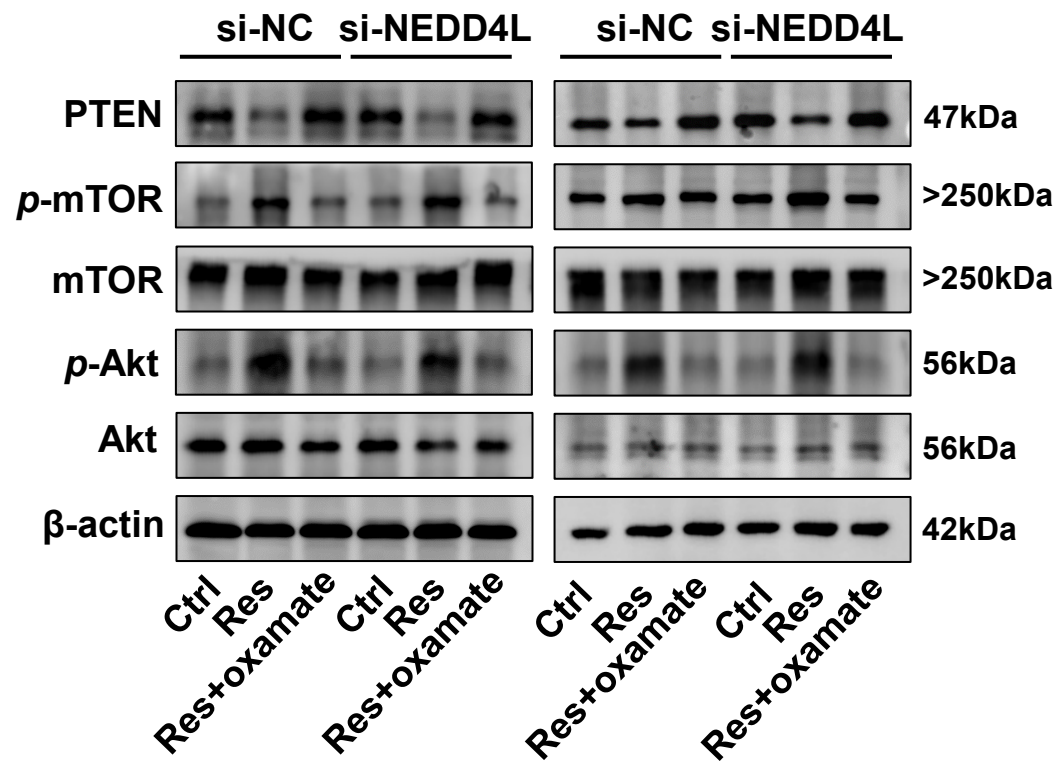

PTEN 47kDa

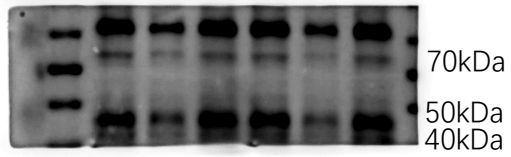

P-mTOR 250kDa

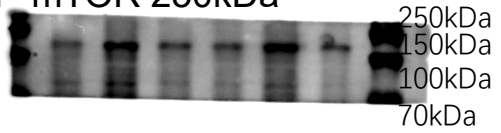

mTOR 250kDa

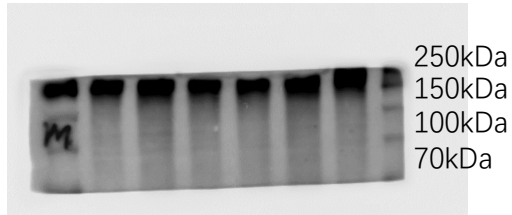

Akt 56kDa

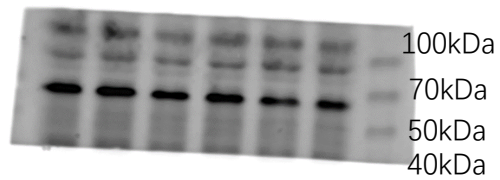

$\beta$ -actin 42kDa

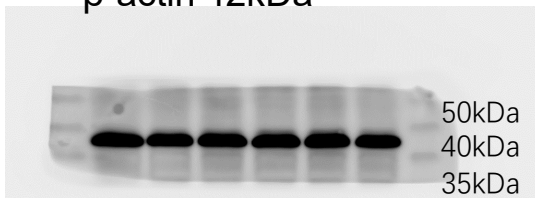

p-Akt 56kDa

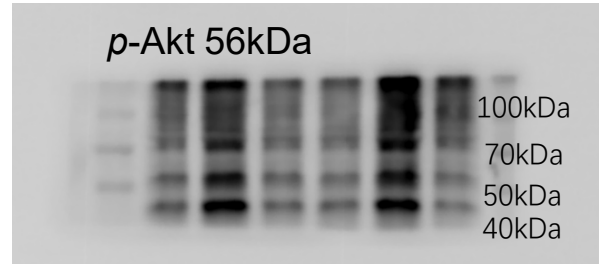

mTOR 250kDa

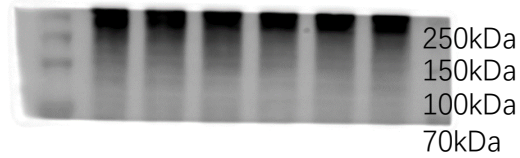

Akt 56kDa

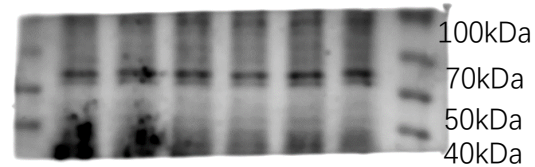

$\beta$ -actin 42kDa

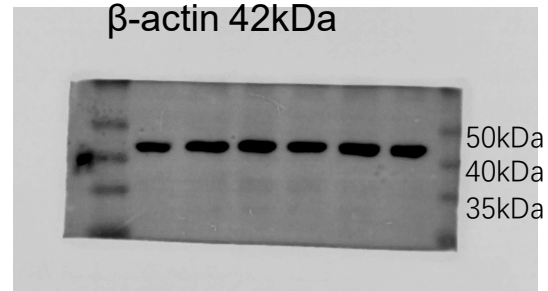

PTEN 47kDa

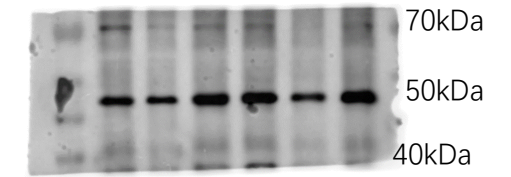

P-mTOR 250kDa

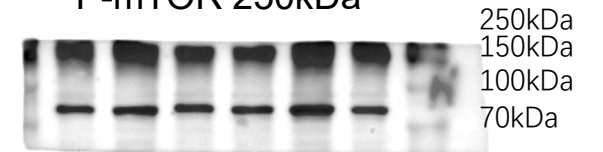

# S5.C

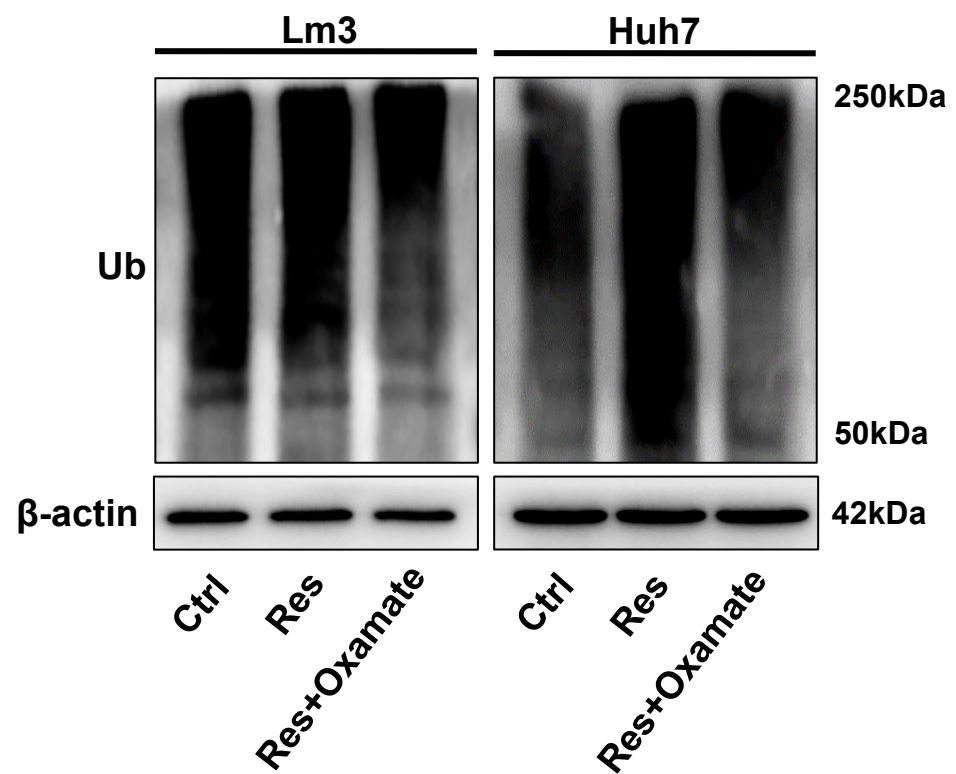

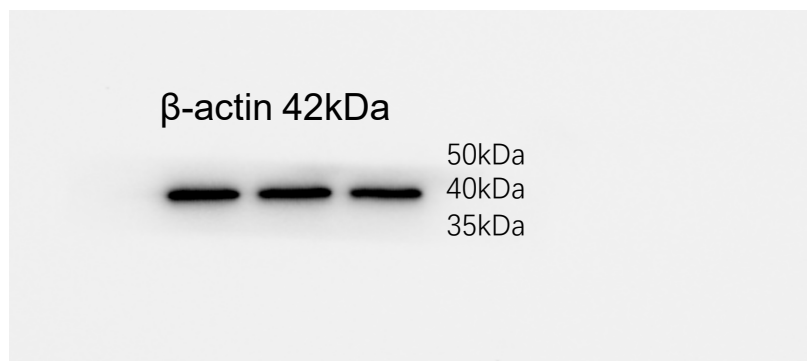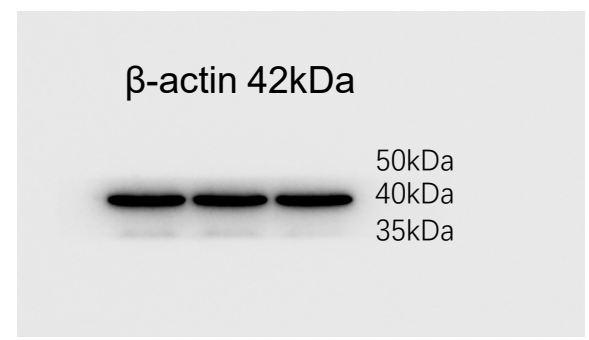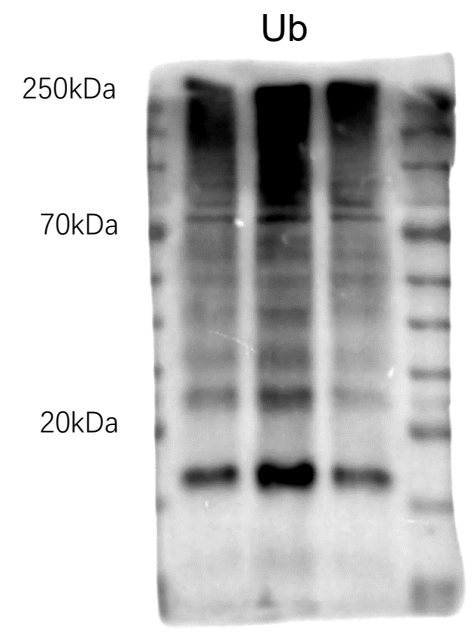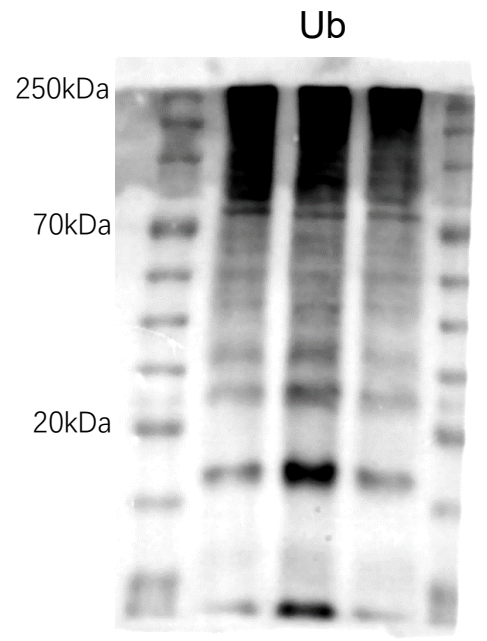



Ub

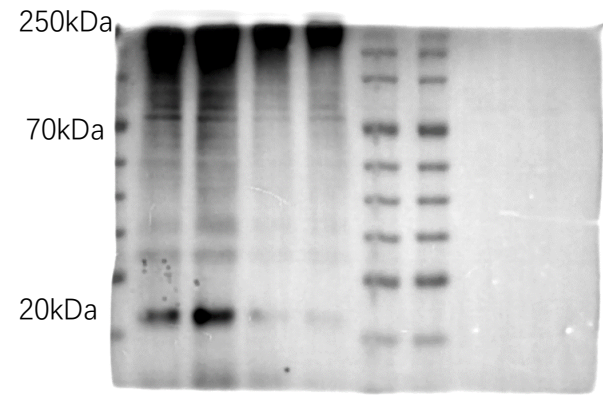

Ub

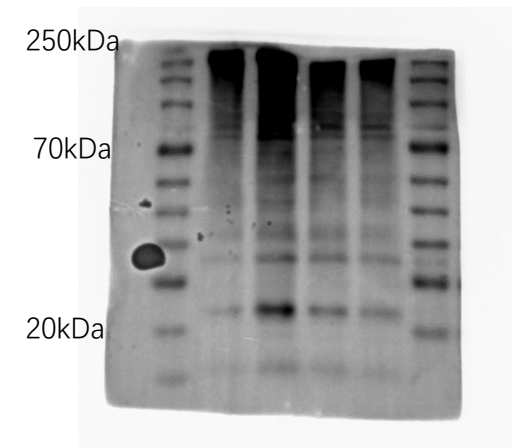

# S6.A

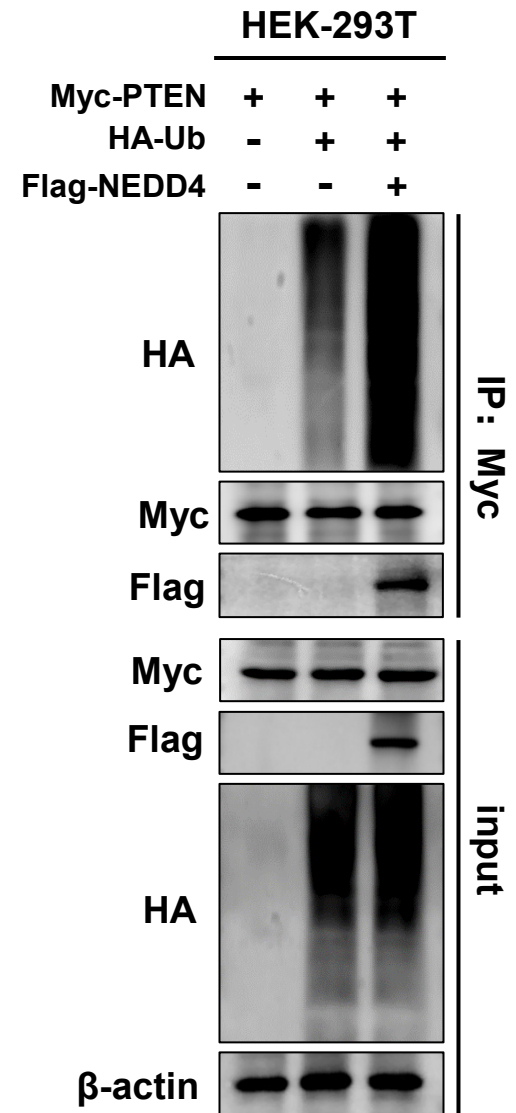

$\beta$ -actin

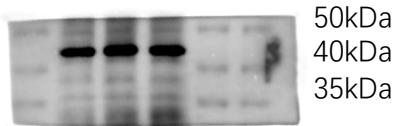

HA

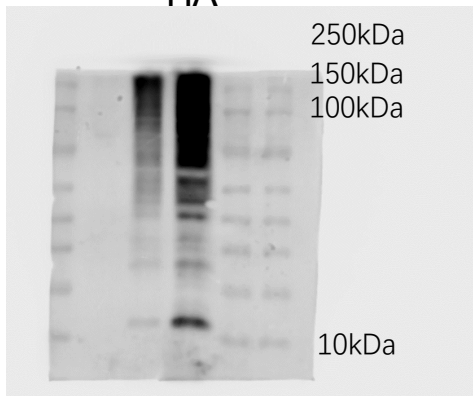

Myc

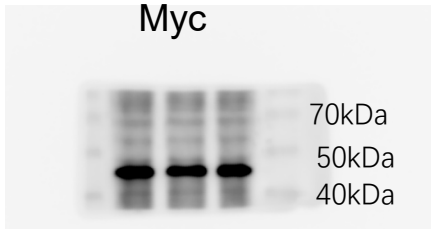

Flag

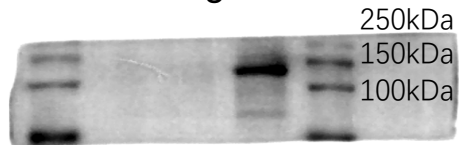

HA

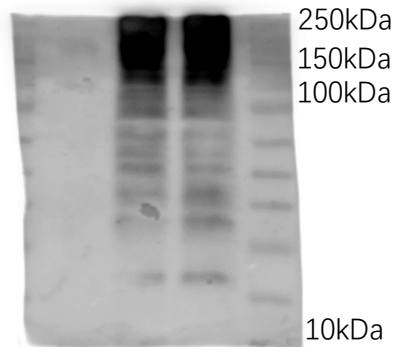

Input Myc

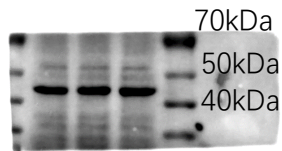

Input:Flag

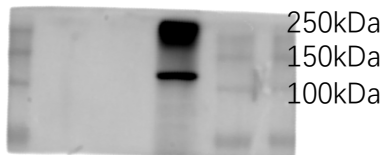

# S7.B

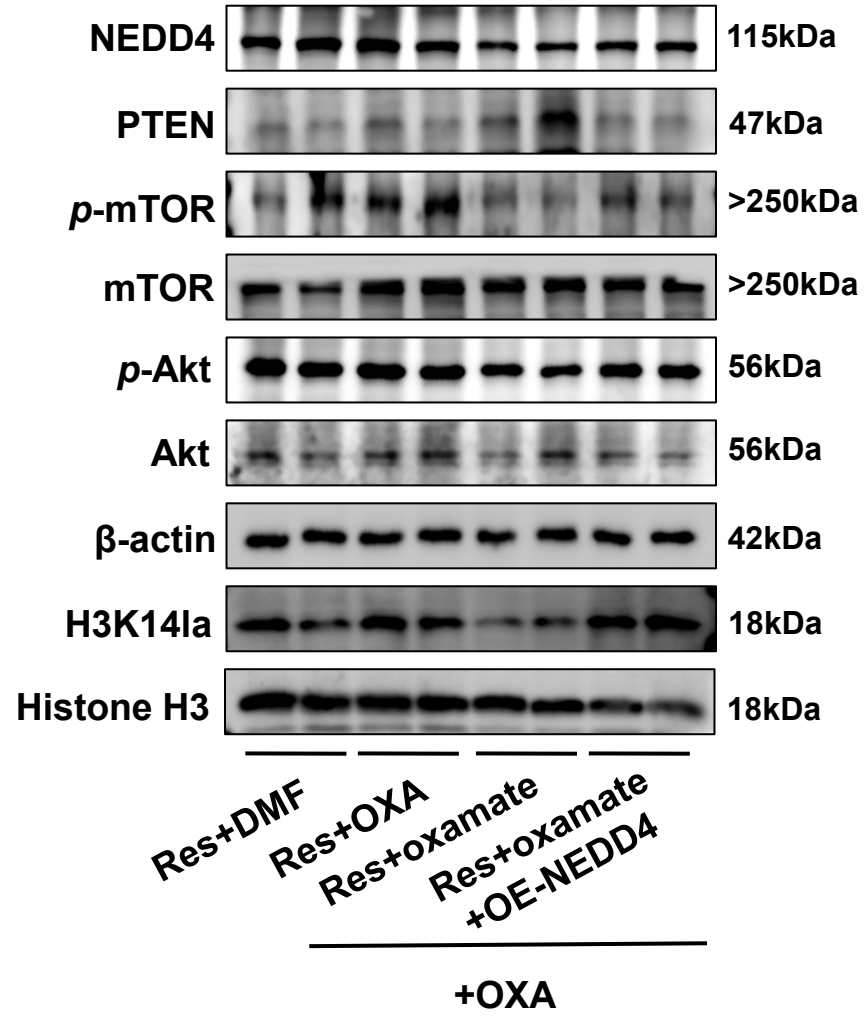

mTOR 250kDa

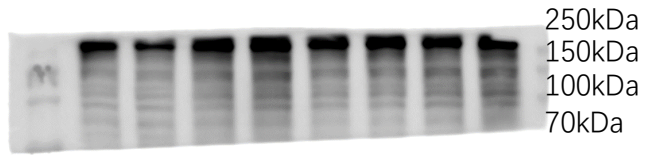

H3 18kDa

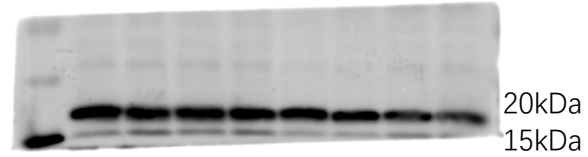

Akt 56kDa

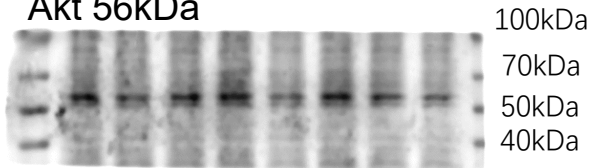

$\beta$ -actin 42kDa

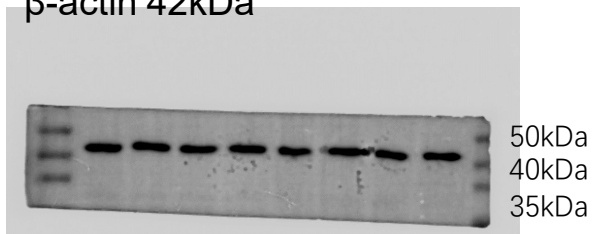

NEDD4 115kDa

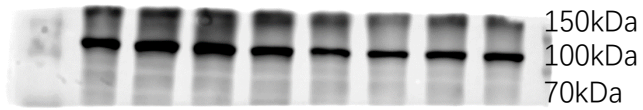

p-Akt 56kDa

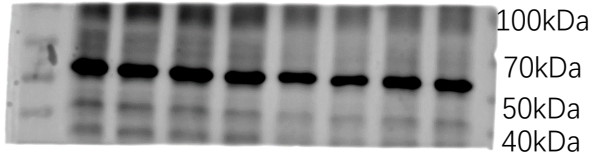

PTEN 47kDa

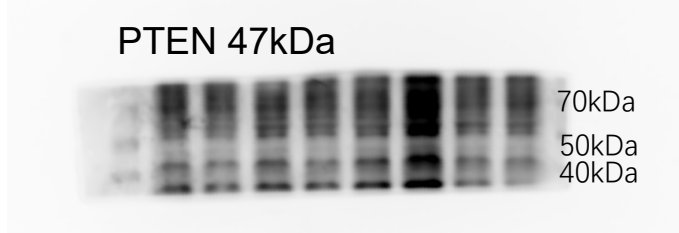

P-mTOR 250kDa

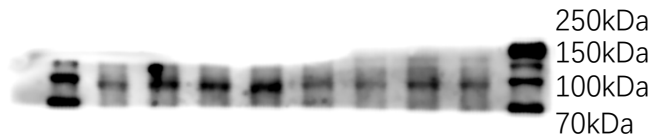

H3K14A 18kDa

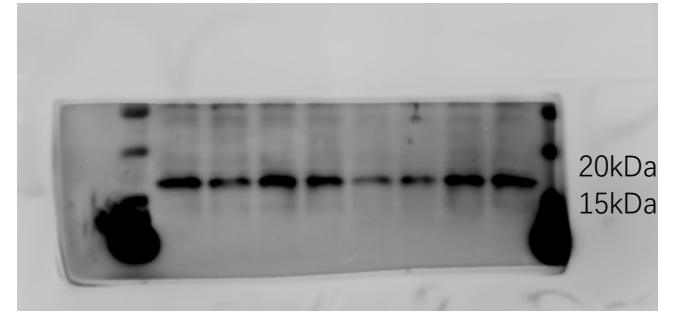

# S7.C

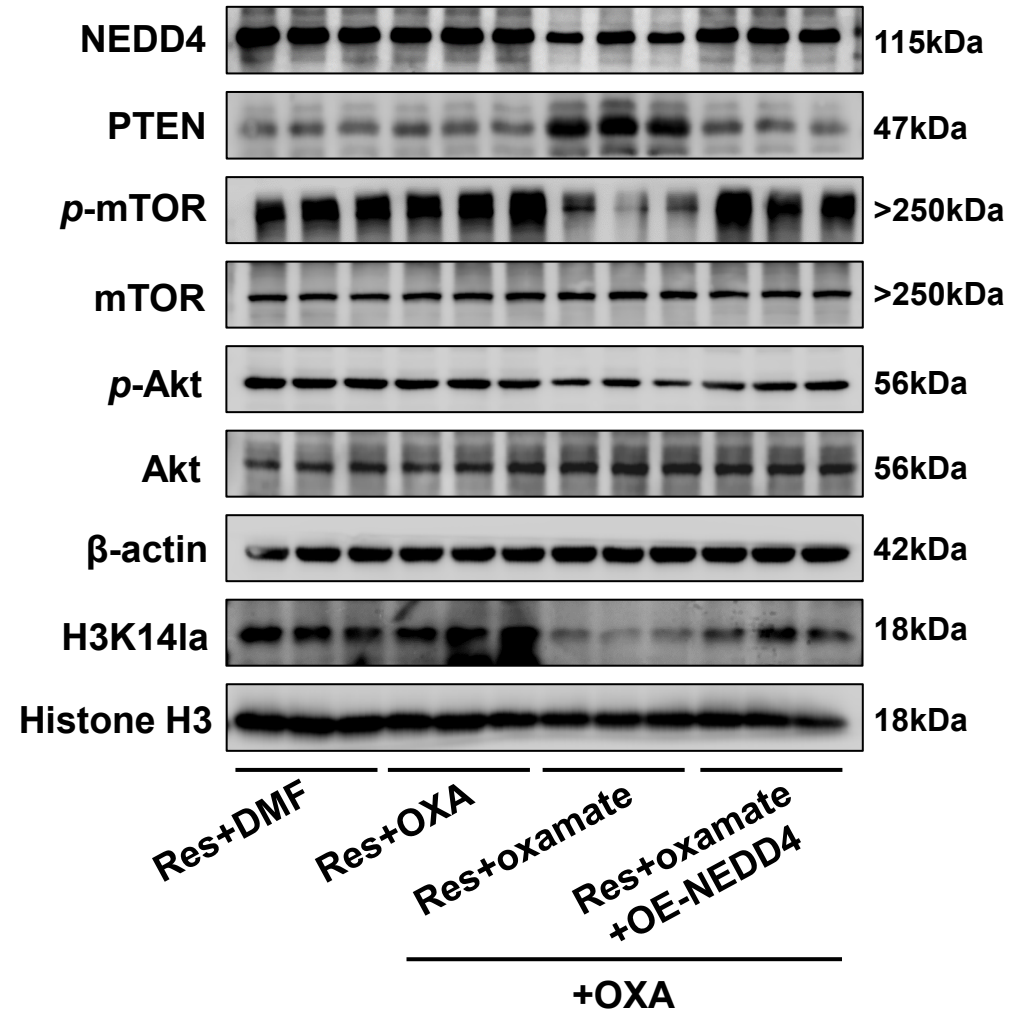

NEDD4 115kDa

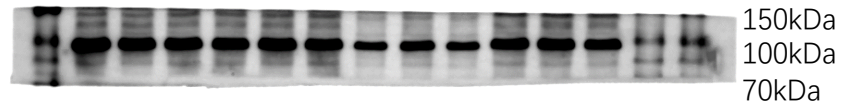

PTEN 47kDa

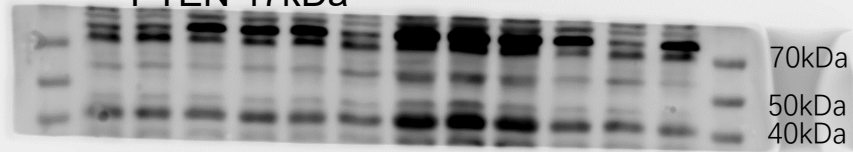

p-mTOR 250kDa

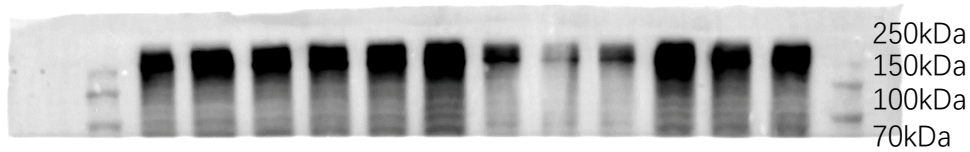

mTOR 250kDa

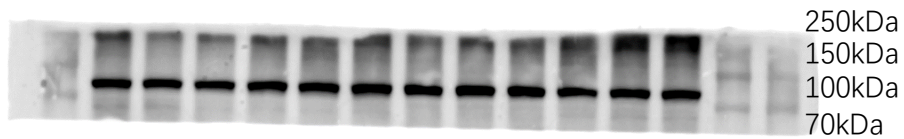

H3 18kDa

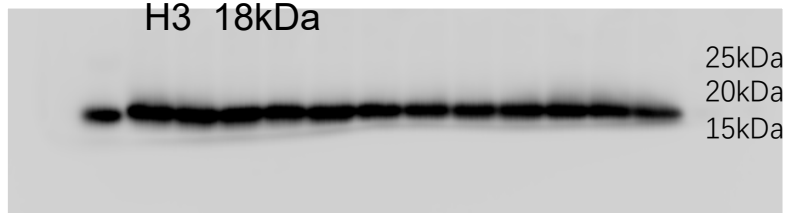

Akt 56kDa

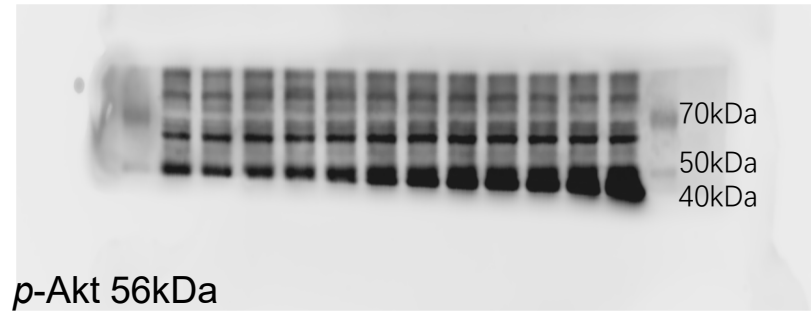

p-Akt 56kDa

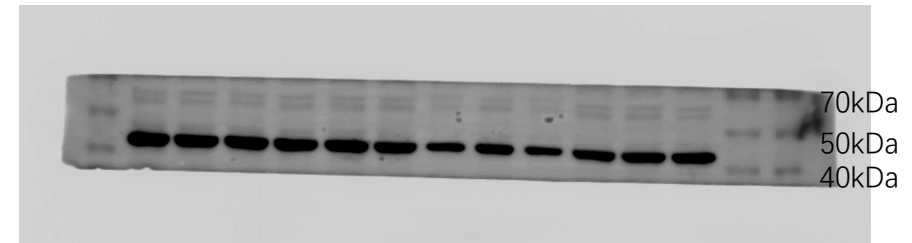

$\beta$ -actin 42kDa

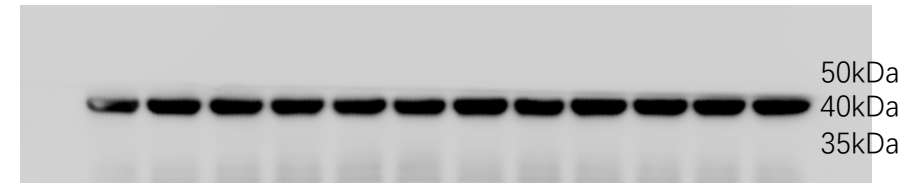

H3K14Ia 18kDa

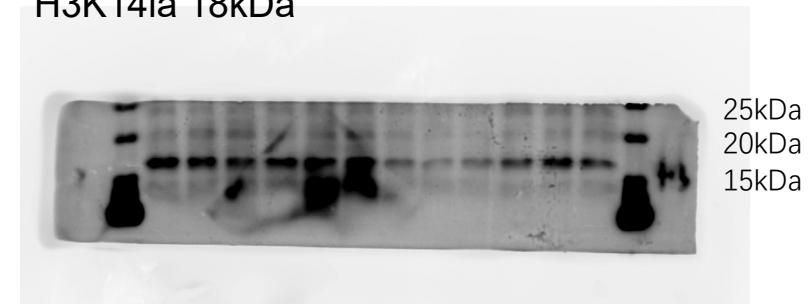

# S7.D

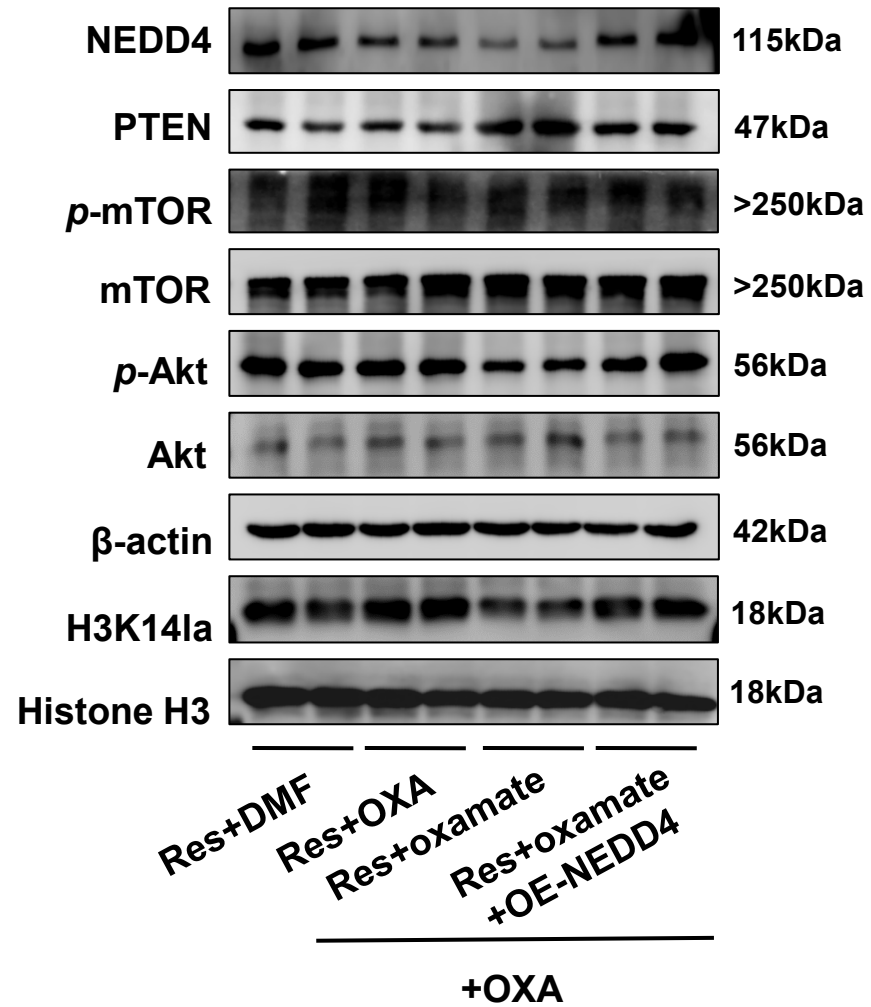



mTOR 250kDa

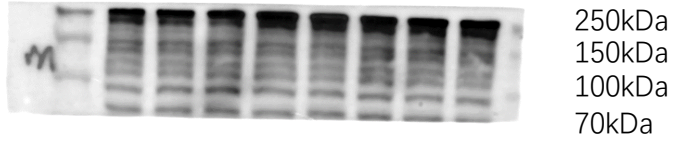

P-Akt 56kDa

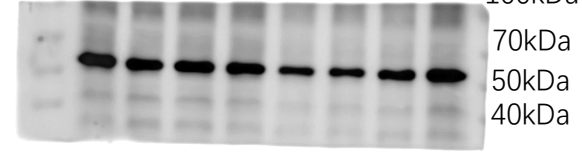

NEDD4 115kDa

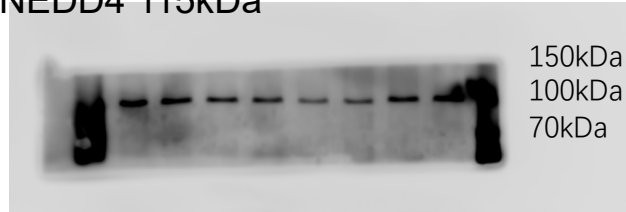

PTEN 47kDa

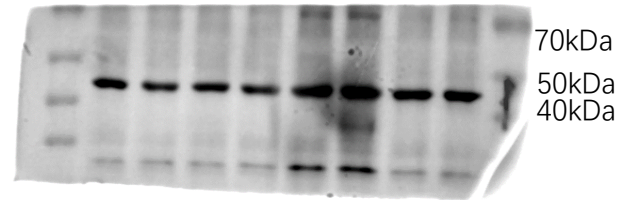

$\beta$ -actin 42kDa

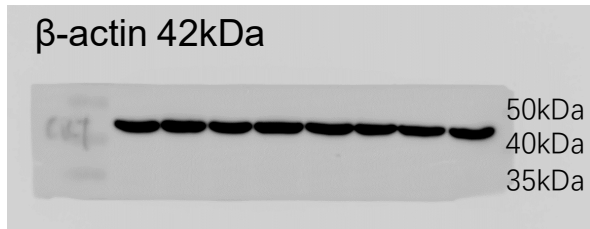

H3K14A 18kDa

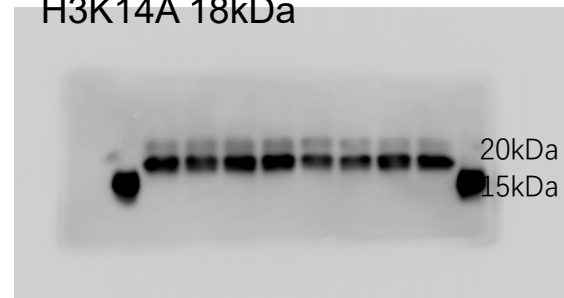

P-mTOR 250kDa

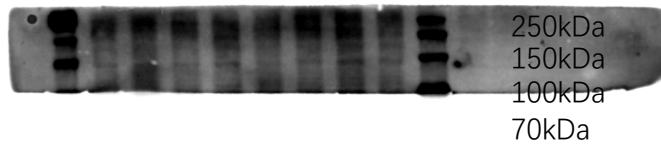

H3 18kDa

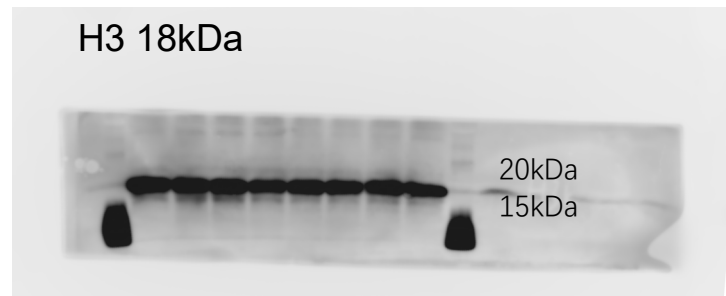

Supplement: 41419_2025_7359_MOESM4_ESM.pdf [file 41419_2025_7359_MOESM4_ESM.pdf]
